1 **Type 2 diabetes promotes cell centrosome amplification and the role**  
2 **of AKT-ROS-dependent signalling of ROCK1 and 14-3-3 $\sigma$**

3

4 Pu Wang<sup>1</sup>, Yu Cheng Lu<sup>1</sup>, Jie Wang<sup>2</sup>, Lan Wang<sup>1</sup>, Hanry Yu<sup>3</sup>, Yuan Fei Li<sup>4</sup>, Alice  
5 Kong<sup>5</sup>, Juliana Chan<sup>5</sup>, Shao Chin Lee<sup>1,\*</sup>

6

7 <sup>1</sup>: School of Life Sciences, Shanxi University, Taiyuan, Shanxi, PR China

8 <sup>2</sup>: Shanxi College of Traditional Chinese Medicine, Taiyuan, Shanxi, PR China,

9 <sup>3</sup>: Department of Physiology, National University of Singapore, Singapore.

10 <sup>4</sup>: Department of Oncology, the First Clinical Hospital of Shanxi Medical  
11 University, Taiyuan, Shanxi, PR China

12 <sup>5</sup>: Department of Medicine and Therapeutics, the Chinese University of Hong Kong,  
13 HKSAR, PR China

14

15 \*: Correspondence: Dr. Shao Chin Lee, School of Life Sciences, Shanxi University,  
16 Taiyuan, Shanxi, PR China. Email: lee\_shao@hotmail.com; Telephone: (86)  
17 13485376021;

18

19 **Running title:**

20 Centrosome amplification in type 2 Diabetes and its mechanisms

21

22

23 **Abstract**

24 Type2 diabetes is associated with oxidative stress which can cause cell centrosome  
25 amplification. The study investigated centrosome amplification in type 2 diabetes and  
26 the underlying mechanisms. We found that centrosome amplification was increased in  
27 the peripheral blood mononuclear cells (PBMC) from the type 2 diabetic patients,  
28 which correlated with the levels of fasting blood glucose and HbA1c. High glucose,  
29 insulin and palmitic acid, alone or in combinations, induced ROS production and  
30 centrosome amplification. Together, they increased AKT activation as well as the  
31 expression, binding and centrosome translation of ROCK1 and 14-3-3 $\sigma$ . Results from  
32 further analyses showed that AKT-ROS-dependent upregulations of expression,  
33 binding and centrosome translocation of ROCK1 and 14-3-3 $\sigma$  was the molecular  
34 pathway underlying the centrosome amplification induced by high glucose, insulin  
35 and palmitic acid. Moreover, the increases in AKT activation and ROS production as  
36 well as expression, binding and centrosome distribution of ROCK1 and 14-3-3 $\sigma$  were  
37 confirmed in the PBMC from the patients with type 2 diabetes. In conclusion, our  
38 results show that type 2 diabetes promotes cell centrosome amplification, and suggest  
39 that the diabetic pathophysiological factors-activated AKT-ROS-dependent signalling  
40 of ROCK1 and 14-3-3 $\sigma$  is the underlying molecular mechanism.

41

42 **Key words:** Centrosome amplification; Type 2 diabetes; AKT; ROS; ROCK1;  
43 14-3-3 $\sigma$ ; Pathophysiological factors.

44

## 45 INTRODUCTION

46 Type 2 diabetes is a common non-communicable disease. At certain stage of the  
47 disease development, patients present pathophysiological features such as  
48 hyperglycemia, hyperinsulinemia and increased plasma level of free fatty acids. At  
49 latter stage, patients may develop insulin deficiency, but continue to have  
50 hyperglycemia and increased plasma level of free fatty acids. These  
51 pathophysiological factors are able to trigger the production of reactive oxygen  
52 species (ROS) (Inoguchi et al., 2000; May and de Haen, 1979) and DNA damage (Lee  
53 and Chan, 2015) *in vitro*, which may explain why oxidative stress and DNA damage  
54 are increased *in vivo* in patients with type 2 diabetes (Lee and Chan, 2015; Orié et al.,  
55 1999).

56  
57 Cell centrosome amplification refers to a cell with more than two centrosomes. There  
58 is evidence that oxidative stress and DNA damage can cause centrosome  
59 amplification (Chae et al., 2005; Dodson et al., 2004). At the molecular level, many  
60 signal mediators for cell centrosome amplification have been identified, which  
61 include those inside or outside the centrosomes. Overexpression of PLK4 (Basto et al.,  
62 2008) or aurora A (Castellanos et al., 2008), both are centrosome proteins, can cause  
63 centrosome amplification. Wang and co-workers show that Chk2 is located in  
64 centrosome, which controls centrosome amplification induced by sub-toxic  
65 concentrations of hydroxyurea (Wang et al., 2015). Overexpression of cyclin E  
66 (Bagheri-Yarmand et al., 2010) which can be in centrosome was also to promote  
67 centrosome amplification. Ras (Zen et al., 2010) which is a protein outside the  
68 centrosomes has been shown to cause centrosome amplification. Interestingly,  
69 BRCA1 promotes centrosome amplification when is translocated to centrosome (Zou  
70 et al., 2014), which shows a dynamic communication between centrosome and its  
71 surrounding environment for centrosome amplification. At the cellular and organismal  
72 levels, centrosome amplification regulates cell division, movement and intracellular  
73 transport (Anderhub et al., 2012), and increases cancer invasion potential (Godinho et

74 al., 2014). While robust centrosome amplification results in multipolar division follow  
75 by mitosis catastrophe (Pannu et al., 2012), there is evidence that moderate  
76 centrosome amplification can induce genome instability (Ganem et al., 2009) and  
77 tumorigenesis (Levine et al., 2017).

78

79 Since type 2 diabetes is associated with oxidative stress (Inoguchi et al., 2000; May  
80 and de Haen, 1979; Lee and Chan, 2015; Orié et al., 1999) which can cause  
81 centrosome amplification (Chae et al., 2005; Dodson et al., 2004), in the present study,  
82 we investigate cell centrosome amplification in type 2 diabetes and the underlying  
83 mechanisms.

84

## 85 **RESULTS**

### 86 **Cell centrosome amplification is increased in patients with type 2 diabetes, which** 87 **is in correlation with fasting blood glucose and HbA1c**

88 To investigate whether centrosome amplification is associated with type 2 diabetes,  
89 first of all, we compared the extent of centrosome amplification in PBMCs from 32  
90 patients with type 2 diabetes and 12 healthy subjects. The clinical characteristics of  
91 the volunteers were summarized in Table 1. Compared with the healthy subjects, the  
92 diabetic patients had higher body mass index, fasting blood glucose, HbA1c and  
93 triglyceride. Moreover, we compared the level of centrosome amplification between  
94 the healthy subject and diabetic patients. The images of centrosome and centrosome  
95 amplification were shown in Fig. 1A. The patients had a greater degree of cell  
96 centrosome amplification than the healthy subjects (8.7 % v.s.3.4%;  $p<0.01$ ) (Fig. 1B);  
97 there was a 2.6-fold increase in centrosome amplification in PBMCs from the patients.  
98 When the diabetic patients were divided into two groups according to their fasting  
99 blood glucose level less or greater than 10mM, there was a step-wise increase in  
100 centrosome amplification ( $p<0.01$ ; Fig. 1C). Indeed, in all the volunteers, correlation  
101 analysis showed that the extent of cell centrosome amplification was correlated with  
102 the fasting blood glucose level ( $R^2 = 0.7$ ;  $p<0.01$ ; Fig. 1D) and HbA1c ( $R^2=0.7$ ;

103 p<0.01; Fig. 1E). Similarly, in the patients alone, the level of centrosome  
104 amplification was also correlated with fasting blood glucose ( $R^2 = 0.5$ ; p <0.01; Fig.  
105 1F) and HbA1c ( $R^2=0.4$ ; p<0.01; Fig. 1G).

106

107 Suggested Table 1 here

108 Suggested Figure 1 here

109

110 **High glucose, insulin and palmitic acid, alone or in combinations, induce**  
111 **centrosome amplification via ROS production**

112 We then investigated whether the pathophysiological factors in type 2 diabetes could  
113 induce centrosome amplification via specific molecular pathway using colon cancer  
114 cells as an experimental model. Some results were verified in normal human breast  
115 epithelial cells wherever it was considered to be meaningful, which was to verify  
116 findings from experiments using cancer cells in non-cancerous cell model. Palmitic  
117 acid, the most common saturated free fatty acid, was used to represent free fatty acids.  
118 We tested ROS pathway to start with. Fluorescent spectrophotometry was used to  
119 quantify the level of ROS when experiments involved more than three samples.  
120 Otherwise, flow cytometry analysis was employed. The results showed that high  
121 glucose, insulin and palmitic acid, alone or in combinations, significantly induced  
122 ROS production (Fig. 2A) and centrosome amplification (Figs. 2C) in the cancer cells.  
123 High glucose, insulin and palmitic acid individually induced centrosome amplification  
124 in concentration-dependent manners (figures not shown). They, together, also  
125 triggered ROS production (Fig. 2B) and centrosome amplification (Fig. 2D) in the  
126 normal human breast epithelial cells. Antioxidant N-acetylcysteine (NAC) was able to  
127 inhibit the ROS production and the centrosome amplification (Figs. 2A -2D). The  
128 potential of high glucose, insulin and palmitic acid in inducing centrosome  
129 amplification was three factors > two factors > single factor (all at p<0.05; Fig. 2C).

130

131 Suggested Figure 2 here

132

133 **Functional transcriptomic analysis identifies AKT, ROCK1 and 14-3-3 $\sigma$  as signal**  
134 **mediators for the centrosome amplification**

135 To further identify the molecular signals for the centrosome amplification, we  
136 performed a functional transcriptomic analysis between the control samples and those  
137 treated with high glucose, insulin and palmitic acid. The differentially expressed  
138 genes were summarized in the supplementary data sheet (Table S1). In total, 729  
139 genes were differentially expressed, with 508 upregulated and 221 downregulated.  
140 Results of bioinformatic annotation were included in supplementary figures S1-S5.  
141 Functional enrichment using GO analysis assigned the genes to 37 terms in three  
142 categories of molecular component, molecular function and biological process (Fig.  
143 S1). The top terms were molecular function, cellular component, biological process  
144 and cell, which had 9%, 9%, 8.4% and 8.3% of the genes, respectively. KEGG  
145 annotation identified 37 pathways which were related to different functional groups  
146 (Fig. S2). The top pathways were signal transduction, infectious diseases, cancer,  
147 immune system and endocrine system, which had 15.6%, 11.6%, 11.1%, 7.4% and 7.0%  
148 of the genes, respectively. Notably, AKT (Fig.S3), ROCK (Fig. S4) and 14-3-3 $\sigma$   
149 (Fig.S5) pathways were activated, which were chosen for further functional analysis.  
150 Western blot analyses confirmed that high glucose, insulin and palmitic acid activated  
151 AKT, which was inhibited by AKT inhibitor Ly294002 or siRNA (Fig. 3A). Similarly,  
152 ROCK1 (Fig. 3B) and 14-3-3 $\sigma$  (Fig. 3C) protein levels were upregulated, which were  
153 inhibited their specific siRNA (Figs. 3B and 3C). We then performed functional  
154 analyses to examine whether AKT, ROCK1 and 14-3-3 $\sigma$  mediated the centrosome  
155 amplification. Indeed, inhibition of AKT using chemical inhibitor or siRNA could  
156 inhibit the centrosome amplification (Fig. 3D). Similarly, siRNA for ROCK1 (Fig. 3E)  
157 and siRNA for 14-3-3 $\sigma$  (Fig. 3F) were also able to inhibit the centrosome  
158 amplification. Moreover, AKR chemical inhibitor, AKT siRNA, ROCK1 siRNA and  
159 14-3-3 $\sigma$ siRNA individually were all able to inhibit the centrosome in the normal  
160 human breast epithelial cells (Figs. 3G and 3H).

161

162 Suggested Figure 3 here

163

164 **AKT-ROS-dependent signaling of ROCK1 and 14-3-3 $\sigma$  is the molecular pathway**  
165 **for the centrosome amplification**

166 We next delineated the signal transduction pathway for the centrosome amplification  
167 in the colon cancer cells. The logic was that inhibition of an upstream signal would  
168 inhibit downstream one(s), while inhibition of a downstream signal would not affect  
169 the upstream one(s). We observed that inhibition of AKT using chemical inhibitor  
170 (Fig. 4A) orsiRNA (Fig. 4B) was able to inhibit ROS production as well as the  
171 upregulations of ROCK1 (Figs. 4C) and 14-3-3 $\sigma$  (Fig. 4D). NAC was able to inhibit  
172 the upregulation of ROCK1 (Fig. 4E) and 14-3-3 $\sigma$  (Fig. 4F), but did not affect the  
173 activation of AKT (figure not shown). ROCK1 or 14-3-3 $\sigma$ siRNA did not affect AKT  
174 activation or ROS production (figures not shown).

175

176 Suggested Figure 4 here

177

178 **High glucose, insulin and palmitic acid increase the binding between ROCK1**  
179 **and 14-3-3 $\sigma$  as well as their centrosome translocation**

180 Next, we investigated the relationships amongst ROCK1, 14-3-3 $\sigma$ and centrosome in  
181 the cancer cells by using ROCK1 and 14-3-3 $\sigma$  antibodies to pull down their binding  
182 partners, as well as to analyse the centrosome translocation of the two proteins. In  
183 pull-down samples using ROCK1 antibody, 14-3-3 $\sigma$  protein was detected, which was  
184 increased in the cells treated with high glucose, insulin and palmitic acid (Fig. 5A).  
185 Similarly, high glucose, insulin and palmitic acid increased the pull down ofROCK1  
186 using 14-3-3 $\sigma$  antibody (Fig. 5A). AKT inhibitor and NAC were able to inhibit the  
187 increase in co-precipitation of ROCK1 and14-3-3 $\sigma$ from the cells treated by high  
188 glucose, insulin and palmitic acid (Figs. 5A). These observations on the Western blot  
189 analysis images were confirmed when the images were quantified (Figs. 5B and 5C.  
190 As shown in confocal images in Figs. 5D and 5E respectively, ROCK1 and 14-3-3 $\sigma$   
191 were localized in the centrosome in all the treated samples. In the cells with more than  
192 one centrosome, only half of the centrosomes had ROCK1, with another half of

193 centrosomes free of ROCK1 (Fig. 5D). The fluorescent intensity of ROCK1 staining,  
194 which indicates the level of ROCK1 in the centrosomes, was higher in the treated  
195 cells compared to that in the control cells, which was inhibited by AKT inhibitor or  
196 NAC but not 14-3-3 $\sigma$ siRNA (Fig. 5F). Comparing with that only 1% of the control  
197 cells had 14-3-3 $\sigma$  in the centrosomes, approximately 20% of the cells treated with  
198 high glucose, insulin and palmitic acid had 14-3-3 $\sigma$  in the centrosomes, which was  
199 inhibited by AKT inhibitor, NAC or ROCK1 siRNA (all at  $p < 0.01$ ; Figs. 5E and 5G).

200

201 Suggested Figure 5 here

202

203 **The increases in AKT activation and ROS production as well as expression,**  
204 **binding and centrosome distribution of ROCK1 and 14-3-3 $\sigma$  *in vitro* are verified**  
205 **in the PBMC from the volunteers**

206 Finally, we investigated whether the molecular signalling events found *in vitro*  
207 occurred *in vivo* in patients with type 2 diabetes. We compared these molecular events  
208 between the PBMC from healthy volunteers and those from type 2 diabetic patients.  
209 The results showed that PBMC from the diabetic patients had increased level of AKT  
210 activation (Fig. 6A) and ROS production (Fig. 6B). The PBMC from the patients also  
211 had increased expression (Fig. 6A), binding (Figs. 6C) and centrosome distribution of  
212 ROCK1 and 14-3-3 $\sigma$  (Figs. 6D and 6E).

213

214 Suggested Figure 6 here

215

## 216 **DISCUSSION**

217 Our results showed that patients with type 2 diabetes had 2.6-fold increase in cell  
218 centrosome amplification *in vivo* in PBMC, which correlated with poor glycemic  
219 control (Fig. 1). Pathophysiological factors in type 2 diabetes, i.e., high glucose,  
220 insulin and palmitic acid, could trigger centrosome amplification (Figs. 2C and 3D).  
221 AKT-ROS-dependent upregulation of expression, binding and centrosome



222 translocation of ROCK1 and 14-3-3 $\sigma$  was the underlying molecular pathway (Figs.  
223 3-6).

224

225 Type 2 diabetes increases the risk of developing all-site cancer, with the exception of  
226 prostate cancer (Giovannucci et al., 2010). Cancer patients with type 2 diabetes have  
227 poorer prognosis than those without diabetes (Mills et al., 2013). However, it remains  
228 unknown why and how type 2 diabetes favours cancer development. Centrosome  
229 amplification can initiate in animal model (Levine et al., 2017) and increase cancer  
230 cell invasion potential (Godinho et al., 2014). In the present study, we showed that  
231 patients with type 2 diabetes had increased level of cell centrosome amplification *in*  
232 *vivo* (Fig. 1). Thus, we speculate whether there is a link between the  
233 diabetes-associated centrosome amplification (Fig. 1) and the increased cancer risk in  
234 type 2 diabetes.

235

236 Our results (Figs. 3-6) support the findings that AKT (Na et al., 2015) and ROS (Chae  
237 et al., 2005) can mediate centrosome amplification, and further place AKT upstream  
238 of ROS. In an apoptosis model, activation of ROCK1 causes AKT inactivation (Zhang  
239 et al., 2016), which is different from our results that placed ROCK1 downstream of  
240 AKT activation (Figs. 4C). Our result (Fig. 4E) showed that ROS was upstream of  
241 ROCK1, which is in agreement with the observations by Shen and Wang (Shen and  
242 Wang, 2015). Oh and Jang showed that AKT can be upstream of 14-3-3 $\sigma$  (Oh and  
243 Jang, 2009), which is supported by our result (Figs. 4D) that AKT was upstream of  
244 14-3-3 $\sigma$ .

245

246 As shown in Fig. 4, inhibition of AKR inhibits all other signals. Inhibition of ROS  
247 inhibits ROCK1 and 14-3-3 $\sigma$  but not AKT. Inhibition of ROCK1 or 14-3-3 $\sigma$  did not  
248 affect any other signals. This suggests that AKT-ROS-dependent signalling of  
249 ROCK1 and 14-3-3 $\sigma$  is the pathway underlying the centrosome amplification by the  
250 experimental treatment. Our results (Figs. 5D and 5E) showed that ROCK1, but not  
251 14-3-3 $\sigma$ , was a centrosome protein. ROCK1 was present in half of the centrosomes

252 when a cell had two or more centrosomes. Whether it is present only in the mother  
253 centrosomes remains to be clarified. In most cases, 14-3-3 $\sigma$  was present in the  
254 centrosomes only in the treated cells (Fig. 5E). Knockdown of ROCK1 inhibited  
255 14-3-3 $\sigma$  translocation to centrosome, while knockdown of 14-3-3 $\sigma$  did not affect the  
256 translocation of ROCK1 to the centrosomes (Figs. 5F and 5G), which suggests that  
257 ROCK1 transports 14-3-3 $\sigma$  to centrosome or is involved in 14-3-3 $\sigma$  translocation to  
258 centrosome after treatment. Downregulation of either ROCK1 or 14-3-3 $\sigma$  inhibited  
259 the centrosome amplification (Figs. 3E and 3F), which suggests that the integrity of  
260 ROCK1 and 14-3-3 $\sigma$  complex is required for the centrosome amplification. These  
261 data suggest that the pathophysiological factors of type 2 diabetes activate AKT-ROS  
262 signalling which promotes the expression and binding of ROCK1 and 14-3-3 $\sigma$  as well  
263 as their translocation to centrosome to promote centrosome amplification.

264

265 High glucose, insulin and palmitic acid, alone or in combinations, did not affect the  
266 cell viability under the experimental conditions, with the exception that high glucose  
267 treatment increased cell viability (data not shown). In some cell line models,  
268 centrosome amplification is associated with cell cycle arrest (Yih et al., 2006). In our  
269 study, high glucose, insulin and palmitic acid, alone or in combination, did not disturb  
270 the cell cycle (data not shown), which suggests that cell cycle arrest is not a  
271 prerequisite for centrosome amplification under our experimental conditions. At the  
272 concentrations of 10, 20 and 30  $\mu$ M, linoleic acid did not significantly affect the  
273 centrosome amplification (figure not shown), suggesting that unsaturated free fatty  
274 acids are unable to suppress the centrosome amplification.

275

276 In our study, 3.4% of the PBMC from the healthy subjects displayed centrosome  
277 amplification (Fig. 1B), which agrees with the finding by Dementyeva and  
278 do-workers that approximately 3% of the peripheral blood cells from healthy donors  
279 display centrosome amplification (Dementyeva et al., 2010).

280

281 It is known that obesity increases the risk for cancer (Mazzarella, 2005). There is also

282 evidence that type 1 diabetes modestly increases the risk for cancer (Zendehdel et al.,  
283 2003). Obesity is associated with increased plasma levels of insulin and free fatty  
284 acids (Golay et al., 1986). Type 1 diabetes is associated with hyperglycaemia and  
285 increased free fatty acid level. All these pathophysiological factors were able to cause  
286 centrosome amplification (Figs. 2C-2D). Thus, we speculate whether centrosome  
287 amplification could play a role the cancer development in obesity and type 1 diabetes.  
288 Moreover, our results (Figs. 3B and 3C) showed that the diabetic pathophysiological  
289 factors could upregulate ROCK1 and 14-3-3 $\sigma$  which are associated with  
290 neurodegeneration (Joo et al., 2015; Hu et al., 2016), upon which we further speculate  
291 whether ROCK1 and/or 14-3-3 $\sigma$  could be new clues for the development of  
292 Alzheimer's disease which shows an increased risk in type 2 diabetes (Zhang et al.,  
293 2016).

294

295 The study involved limited number of subjects. Further analysis with large cohorts is  
296 required to confirm the findings. In the study, we used PBMC to demonstrate the  
297 increase in centrosome amplification in type 2 diabetes. This raises a concern of  
298 whether centrosome amplification occurs in other tissues prone to diabetes-related  
299 cancer.

300

301 In conclusion, our results show that type 2 diabetes promotes cell centrosome  
302 amplification, and suggest that activation of AKT-ROS-dependent upregulations in  
303 expression, binding and centrosome translocation of ROCK1 and 14-3-3 $\sigma$  by the  
304 pathophysiological factors in type 2 diabetes is the underlying molecular mechanism.

305

## 306 **MATERIALS AND METHODS**

### 307 **Chemicals, antibodies and cells**

308 All chemicals were purchased from Sigma (St. Louis, MO, USA). Gama-tubulin  
309 antibody (No. ab27074; mouse antibody) was purchased from Abcam (Cambridge,  
310 UK). Rock1 antibody (No. 4035; rabbit antibody) was provided by cell signaling  
311 technology (Boston, MA, USA). 14-3-3 $\sigma$  antibody (No. PLA0201; rabbit antibody)  
312 was purchased from Sigma (St. Louis, MO, USA). Other antibodies were provided by

313 Cell Signalling Technology (Boston, MA, USA). HCT116 colon cancer cells were  
314 kindly provided by Dr. B. Vogelstein of the Johns Hopkins University School of  
315 Medicine, who produced the cell line. Normal human breast epithelial cells  
316 (PCS-600-010) and culture medium were purchased from the American Type Culture  
317 Collection (ATCC, Manassas, VA, USA). The culture medium and reagents for the  
318 colon cancer cells were purchased from Gibco (Beijing, China). The palmitic acid  
319 stock was conjugated to fatty acid-free bovine albumin in a 3:1 molar ratio at 37 °C  
320 for 1 hour before use. Anti-gamma tubulin antibody was used to detect centrosome by  
321 innumofluorescent staining. ROCK1 siRNA treatment largely reduced the staining of  
322 ROCK1. 14-3-3 was seen in the centrosome only after experimental treatment. These  
323 observations showed that non-specific staining by the antibodies would not affect the  
324 experimental observations.

325

### 326 **Clinical study**

327 Institutional approval and written informed consent were obtained from the medical  
328 ethics committee and all participating subjects, respectively. All the volunteers were  
329 consecutively recruited during 2014 and 2016 at the Shanxi Hospital of Integrative  
330 Western and Chinese Medicine and Shanxi Medical University without any selection  
331 bias. Type 2 diabetes was diagnosed according to the 1999 WHO criteria. All healthy  
332 subjects were free hypertension. Each volunteer donated 5-ml blood sample. All the  
333 clinical data were collected by clinical doctors responsible for the clinical study.

334

### 335 **Cell culture**

336 HCT116 cells were maintained in DMEM (low glucose, 5mM) supplemented with 50  
337 U/ml penicillin, 50 g/ml streptomycin and 10% (v/v) foetal calf serum. Human  
338 primary breast epithelial cells were cultured in basal medium (PCS-600-030) with a  
339 growth kit (PCS-600-040, ATCC, Manassas, USA) according to ATCC instructions.  
340 Epithelial cells from the second passage in our lab were used in the study. In cell  
341 model studies, cells treated for 12 hours were used for ROS quantification. Cells  
342 treated for 24 hours were harvested for co-immunoprecipitation assay. Those treated  
343 for 30 hours were used for transcriptomic analysis. Cells treated for 48 hours were  
344 used for quantification of centrosome number and protein distribution in centrosomes.  
345 We performed time course assays and the time points were chosen, since these time  
346 points produced the highest level of differences for the measurements between the

347 control and the treated samples.

348

### 349 **Quantification of ROS**

350 Changes in the intracellular ROS levels were determined using the  
351 2,7'-dichlorofluorescein (DCFH-DA, Beyotime, Shanghai, China) probe on a  
352 spectrofluorometer (SpectraMax M5, Molecular Devices, Silicon Valley USA). Cells  
353 grown in a 24-well plate were treated, washed twice with PBS, and incubated with  
354 DCFH-DA for 20 min at 37 °C. Then, the cells were harvested, washed once in PBS,  
355 and transferred to a 96-well plate. Optical density values were obtained at an  
356 excitation wavelength of 488 nm and an emission wavelength of 525 nm.

357 Alternatively, the ROS levels were quantified using a flow cytometer (FACSCalibur,  
358 BD, New Jersey, USA) according to the manufacturer's instructions.

359

### 360 **Confocal microscopy**

361 A cover slip was placed in a well of a 6-well plate. Cells were plated at a density of  
362 50,000 cells per well. Cells grown on the cover slips were fixed in cold methanol and  
363 acetone (1:1; v:v) for 6 min at -20°C, followed by three washes with PBS (10 min  
364 each time). Then, the cells were incubated with 0.1% Triton X-100 for 15 minutes and  
365 3% BSA for 1 hour. The cells were incubated with a primary antibody in 3% BSA in  
366 PBS overnight at 4 °C, washed twice with PBS, and incubated with a  
367 FITC-conjugated secondary antibody in 3% BSA in 1×PBS for 1 hour at room  
368 temperature in the dark. Finally, the cells were mounted with mounting medium.

369 Confocal microscopy was performed using the Zeiss LSM880 microscope  
370 (Oberkochen, Germany) with a 1.4 NA oil-immersion lens, and image processing was  
371 performed with Zen software (Oberkochen, Germany). One hundred cells were  
372 counted for their centrosome numbers for the percentage of centrosome amplification.

373

374 To separate peripheral blood mononuclear cells (PBMC), we loaded a 5-ml blood  
375 sample on the top of separation medium (LTS1077; TBD, Tianjin, China) in a  
376 centrifuge tube and centrifuged at 250 g for 20 min. The cells on the top were  
377 collected, washed twice in PBS, smeared onto a cover slip, and air dried for 24 hours  
378 at room temperature.

379

380

### 381 **Transcriptomic profiling and bioinformatic annotation**

382 The cells were harvested after treatment and total RNA was extracted. Two cDNA  
383 libraries (control or treatment with high glucose, insulin, and palmitic acid) were  
384 constructed using the Illumina TruSeq RNA Sample Preparation Kit (Illumina, USA)  
385 according to the manufacturer's instructions. After several steps of purification,  
386 adapter addition, and cDNA length selection, the two libraries were sequenced  
387 independently using an Illumina HiSeq™500 platform (Shanghai Personal  
388 Biotechnology Co., Shanghai, China). Pathway assignments were generated using GO  
389 (geneontology.org) and KEGG databases (www.kegg.jp).

390

### 391 **Western blot analysis**

392 The cells were lysed in RIPA buffer. Proteins were separated by polyacrylamide gel  
393 electrophoresis and transferred onto PVDF membrane. After blocking for 1 hour at  
394 room temperature with TBST containing 0.05% (v/v), Tween-20 and 5% (w/v)  
395 non-fat milk, the membranes were incubated with primary antibodies overnight at  
396 4 °C, followed by washes with TBST containing 0.05% Tween-20. The membranes  
397 were then incubated with a horseradish peroxidase-conjugated secondary antibody for  
398 1 hour at room temperature. ECL reagents (Thermo Biosciences, Massachusetts, USA)  
399 were used to visualize the protein bands which were captured on X-ray film.

400

### 401 **Co-immunoprecipitation**

402 Cells were harvested under non-denaturing conditions, washed by ice-cold PBS for 3  
403 times, lysed in 0.5 ml ice-cold cell lysis buffer and centrifuged. Supernatant was  
404 collected to a new tube and incubated with 20 ul Protein G Plus /Protein A agarose  
405 (Miliproe, IP05 USA) with gentle shaking for 2 hours at 4 oC. Protein G Plus /Protein  
406 A agarose was then removed by centrifuge for 10 min at 4 oC, and supernatant was  
407 incubated with primary antibody overnight at 4 oC with gentle shaking. After that,  
408 30ul Protein G Plus /Protein A agarose were added and incubated under gentle  
409 shaking for 4 hours at 4 oC. Finally Protein G Plus /Protein A agarose was collected  
410 by centrifuge.

411

### 412 **Knockdown of protein level**

413 The pre-designed siRNA oligonucleotides (Songon Technology, Shanghai, China) for  
414 Akt1, ROCK1 and 14-3-3σ were:

415 GAGUUUGAGUACCUGAAGCUGUU (sense) and  
416 AACAGCUUCAGGUACUCAAACUC (antisense);  
417 UGAUCUUGUAGCUCCCGCAUGUGUC (sense) and  
418 ACUAGAACAUCGAGGGCGUACACAG (antisense); and  
419 ACCTGCTCTCAGTAGCCTA (sense) and TAGGCTACTGAGAGCAGGT  
420 (antisense), respectively. HCT116 cells ( $5 \times 10^4$  cells per well) were seeded in 6-well  
421 plates and cultured for 24 hours, and then were transfected with 200 pM siRNA  
422 oligonucleotides using Lipofectamine 2000 transfection reagent (Invitrogen,  
423 California, USA), according to the manufacturer's instructions. The total AKT protein  
424 level was evaluated by Western blot analysis 24 hours after transfection.

425

### 426 **Statistical analysis**

427 All the experiments including the transcriptomic profiling were performed in triplicate.  
428 The data are expressed as the mean  $\pm$  SD. Student's t-test was performed to compare  
429 the difference between two groups. Multi-group comparisons were performed using  
430 one-way ANOVA analysis. Linear regression analysis was performed for correlations.  
431 The statistical analysis software package SPSS21 was employed for the statistical  
432 comparisons. A p value  $< 0.05$  was considered statistically significant.

433

### 434 **Acknowledgement**

435 The authors thank Dr. ZY Li for her help in establishing our cell culture facility.

436

### 437 **Competing interests**

438 The authors declare that there is no conflict of interest.

439

### 440 **Author contribution**

441 P Wang and YC Lu performed most of the experiments. J Wang and YF LI  
442 contributed the clinical studies. L Wang provided the technologies. H Yu was involved  
443 in grant applications and the study design. A Kong and J Chan contributed the ROS  
444 data set and were involved in designing the study. SC Lee was the principal  
445 investigator, who was in charge the whole project, from grant application and study  
446 design to manuscript preparation.

447 **Funding**

448 This work was supported by Shanxi University (No. 113533901005 and 113545017;  
449 Talent Recruitment Fund) and the Department of Science and Technology of Shanxi  
450 Province (2015081034 and 201601D11066).

451

452 **References**

- 453 Anderhub, S.J., Krämer, A., Maier, B. (2012). Centrosome amplification in  
454 tumorigenesis. *Cancer Lett.* **322**, 8-17.
- 455 Bagheri-Yarmand, R., Biernacka, A., Hunt, K.K., Keyomarsi, K. (2010). Low  
456 molecular weight cyclin E overexpression shortens mitosis, leading to  
457 chromosome missegregation and centrosome amplification. *Cancer Res.* **70**,  
458 5074-5084.
- 459 Basto, R., Brunk, K., Vinadogrova, T., Peel, N., Franz, A., Khodjakov, A., Raff, J.W.  
460 (2008). Centrosome amplification can initiate tumorigenesis in flies. *Cell* **133**,  
461 1032-1042.
- 462 Castellanos, E., Dominguez, P., Gonzalez, C. (2008). Centrosome dysfunction in  
463 *Drosophila* neural stem cells causes tumors that are not due to genome  
464 instability. *Curr. Biol.* **118**, 1209-1214.
- 465 Chae, S., Yun, C., Um, H., Lee, J.H., Cho, H. (2005). Centrosome amplification and  
466 multinuclear phenotypes are induced by hydrogen peroxide. *Exp. Mol. Med.* **37**,  
467 482-487.
- 468 Dementyeva, E., Nemeč, P., Kryukov, F., Muthu, K.R., Smetana, J., Zaoralova, R.,  
469 Kupska, R., Kuglik, P., Hajek, R. (2010). Centrosome amplification as a  
470 possible marker of mitotic disruptions and cellular carcinogenesis in multiple  
471 myeloma. *Leuk. Res.* **34**, 1007-1011.
- 472 Dodson, H., Bourke, E., Jeffers, L.J., Vagnarelli, P., Sonoda, E., Takeda, S., Earnshaw,  
473 W.C., Merdes, A., Morrison, C. (2004). Centrosome amplification induced by  
474 DNA damage occurs during a prolonged G2 phase and involves ATM. *EMBO J.*  
475 **23**, 3864-3873.
- 476 Ganem, N.J., Godinho, S.A., Pellman, D. (2009). A mechanism linking extra



- 477 centrosomes to chromosomal instability. *Nature* **460**, 278-82.
- 478 Giovannucci, E., Harlan, D.M., Archer, M.C., Bergenstal, R.M., Gapstur, S.M., Habel,  
479 L., Pollak, M., Regensteiner, J.G., Yee, D. (2010) Diabetes and cancer: a  
480 consensus report. *CA Cancer J. Clin.* **60**, 207-221.
- 481 Godinho, S.A., Picone, R., Burute, M., Dagher, R., Su, Y., Leung, C.T., Polyak, K.,  
482 Brugge, J.S., Théry, M., Pellman, D. (2014). Oncogene-like induction of cellular  
483 invasion from centrosome amplification. *Nature* **510**, 167-171.
- 484 Golay, A., Swislocki, A.L., Chen, Y.D., Jaspan, J.B., Reaven, M. (1986). Effect of  
485 obesity on ambient plasma glucose, free fatty acid, insulin, growth hormone,  
486 and glucagon concentrations. *J. Clin. Endocrinol. Metab.* **63**, 481-484.
- 487 Hu, Y.B., Zou, Y., Huang, Y., Zhang, Y.F., Lourenco, G.F., Chen, S.D., Halliday, G.M.,  
488 Wang, G., Ren, R.J. (2016). ROCK1 is associated with Alzheimer's  
489 disease-specific plaques, as well as enhances autophagosome formation but not  
490 autophagic A $\beta$  clearance. *Front. Cell Neurosci.* **10**, 253.
- 491 Inoguchi, T., Li, P., Umeda, F., Yu, H., Kakimoto, M., Imamura, M., Etoh, T.,  
492 Hashimoto, T., Naruse, M., Sano, H., Utsumi, H., Nawata, H. (2000). High  
493 glucose level and free fatty acid stimulate reactive oxygen species production  
494 through protein kinase C--dependent activation of NAD(P)H oxidase in cultured  
495 vascular cells. *Diabetes* **49**, 1939-1945.
- 496 Joo, Y., Schumacher, B., Landrieu, I., Bartel, M., Smet-Nocca, C., Jang, A., Choi,  
497 H.S., Jeon, N.L., Chang, K.A., Kim, H.S., Ottmann, C., Suh, Y.H. (2015).  
498 Involvement of 14-3-3 in tubulin instability and impaired axon development is  
499 mediated by Tau. *FASEB J.* **29**, 4133-4144.
- 500 Lee, S.C., Chan, J. (2015). Evidence for DNA damage as a biological link between  
501 diabetes and cancer. *Chin. Med. J. (Engl.)* **128**, 1543-1548.
- 502 Levine, M.S., Bakker, B., Boeckx, B., Moyett, J., Lu, J., Vitre, B., Spierings, D.C.,  
503 Lansdorp, P.M., Cleveland, D.W., Lambrechts, D., Foijer, F., Holland, A.J.  
504 (2017). Centrosome amplification is sufficient to promote spontaneous  
505 tumorigenesis in mammals. *Dev. Cell* doi: 10.1016/j.devcel.2016.12.022.
- 506 May, J., de Haen, C. (1979). Insulin-stimulated intracellular hydrogen peroxide

- 507 production in rat epididymal fat cells. *J. Biol. Chem.* **254**, 2214-2220.
- 508 Mazzearella, L. (2015). Why does obesity promote cancer? Epidemiology, biology, and  
509 open questions. *Ecancermedicalscience* **10**, 3332/ecancer2015.554.
- 510 Mills, K.T., Bellows, C.F., Hoffman, A.E., Kelly, T.N., Gagliardi, G. (2013) Diabetes  
511 mellitus and colorectal cancer prognosis: a meta-analysis. *Dis. Colon Rectum.*  
512 **56**, 1304-1319.
- 513 Na, H.J., Park, J.S., Pyo, J.H., Jeon, H.J., Kim, Y.S., Arkin, R., Yoo, M.A. (2015).  
514 Metformin inhibits age-related centrosome amplification in Drosophila midgut  
515 stem cells through AKT/TOR pathway. *Mech. Ageing Dev.* **149**, 8-18.
- 516 Oh, J.E., Jang, D.H. (2009). Alpha3beta1 integrin promotes cell survival via multiple  
517 interactions between 14-3-3 isoforms and proapoptotic proteins. *Exp. Cell Res.*  
518 **315**, 3187-3200.
- 519 Orié, N.N., Zidek, W., Tepe, M. (1999). Reactive oxygen species in essential  
520 hypertension and non-insulin-dependent diabetes mellitus. *Am. J. Hypertens.* **12**,  
521 1169-1174.
- 522 Pannu, V., Rida, P.C., Ogden, A., Clewley, R., Cheng, A., Karna, P., Lopus, M.,  
523 Mishra, R.C., Zhou, J., Aneja, R. (2012). Induction of robust de novo  
524 centrosome amplification, high-grade spindle multipolarity and metaphase  
525 catastrophe: a novel chemotherapeutic approach. *Cell Death Dis.* **3**, e346.
- 526 Shen, K., Wang, Y. (2015). Cocktail of four active components derived from Sheng  
527 Mai San inhibits hydrogen peroxide-induced PC12 cell apoptosis linked with  
528 the caspase-3/ROCK1/MLC pathway. *Rejuvenation Res.* **18**, 517-527
- 529 Wang, C.Y., Huang, E.Y., Huang, S.C., Chung, B.C. (2015). DNA-PK/Chk2 induces  
530 centrosome amplification during prolonged replication stress. *Oncogene* **34**,  
531 1263-1269.
- 532 Yih, L.H., Tseng, Y.Y., Wu, Y.C., Lee, T.C. (2006). Induction of centrosome  
533 amplification during arsenite-induced mitotic arrest in CGL-2 cells. *Cancer Res.*  
534 **66**, 2098-2106.
- 535 Zen, X., Shaikh, F.Y., Harrison, M.K., Adon, A.M., Trimboli, A.J., Carroll, K.A.,  
536 Sharma, N., Timmers, C., Chodosh, L.A., Leone, G., Saavedra, H.I. (2010). The

537 Ras oncogene signals centrosome amplification in mammary epithelial cells  
538 through cyclin D1/Cdk4 and Nek2. *Oncogene* **29**, 5103-5112.

539 Zendejdel, K., Nyrén, O., Ostenson, C.G., Adami, H.O., Ekblom, A., Ye, W. (2003).  
540 Cancer incidence in patients with type 1 diabetes mellitus: a population-based  
541 cohort study in Sweden. *J. Natl. Cancer Inst.* **95**, 1797-1800.

542 Zhang, J., Chen, C., Hua, S., Liao, H., Wang, M., Xiong, Y., Cao, F. (2016). An  
543 updated meta-analysis of cohort studies: Diabetes and risk of Alzheimer's  
544 disease. *Diabetes Res. Clin. Pract.* **124**, 41-47.

545 Zhang, Y., Fu, R., Liu, Y., Li, J., Zhang, H., Hu, X., Chen, Y., Liu, X., Li, Y., Li, P.,  
546 Liu, E., Gao, N. (2016). Dephosphorylation and mitochondrial translocation of  
547 cofilin sensitizes human leukemia cells to cerulenin-induced apoptosis via the  
548 ROCK1/Akt/JNK signaling pathway. *Oncotarget* **7**, 20655-20668.

549 Zou, J., Zhang, D., Qin, G., Chen, X., Wang, H., Zhang, D. (2014). BRCA1 and FancJ  
550 cooperatively promote interstrand cross linker induced centrosome  
551 amplification through the activation of polo-like kinase 1. *Cell Cycle* **13**,  
552 3685-3697.

553

## 554 **Figure Legends**

555

### 556 **Fig. 1.**

557 **Cell centrosome amplification is increased in patients with type 2 diabetes, which**  
558 **is in correlation with fasting blood glucose and HbA1c.** (A): image of centrosome  
559 amplification; (B): cell centrosome amplification is increased in patients with type 2  
560 diabetes; (C): evidence that centrosome amplification correlates with the fasting blood  
561 glucose; (D) and (E): correlation analysis shows that the centrosome amplification  
562 correlates with the fasting blood glucose and HbA1c in all the volunteers; (F) and (G):  
563 in the diabetic patients alone, centrosome amplification also correlates with fasting  
564 blood glucose and HbA1c. Student t-test was used to compare the means between two  
565 groups. One way ANOVA analysis was used to compare multiple groups. Linear  
566 regression was performed for correlations. \*:  $p < 0.05$ ; \*\*:  $p < 0.01$ , compared with

567 that in the control group.

568

569 **Fig. 2.**

570 **High glucose, insulin and palmitic acid, alone or in combinations, induce**  
571 **centrosome amplification via ROS production. (A):** high glucose, insulin and  
572 palmitic acid, alone or in combinations, triggers ROS production in the cancer cells;  
573 **(B):** the pathophysiological factors, together, trigger ROS production in normal  
574 human breast epithelial cell; **(C):** high glucose, insulin and palmitic acid, alone or in  
575 combinations, can promote centrosome amplification in the cancer cells; **(D):** high  
576 glucose, insulin and palmitic acid can trigger centrosome amplification in the normal  
577 human breast epithelial cells. **(A)-(D):** NAC inhibits the ROS production and the  
578 centrosome amplification. Glu: glucose, 15 mM; Ins: insulin, 5 nM; Pal: palmitic acid,  
579 150  $\mu$ M; NAC: 3 mM. One way ANOVA analysis was used to compare multiple  
580 groups. \*:  $p < 0.05$ ; \*\*:  $p < 0.01$ .

581

582 **Fig. 3.**

583 **Functional transcriptomic analysis identifies AKT, ROCK1 and 14-3-3 $\sigma$  as signal**  
584 **mediators for the centrosome amplification. (A), (B) and (C):**the diabetic  
585 pathophysiological factors activate of AKT, ROCK1 and 14-3-3 $\sigma$ , respectively; **(D):**  
586 inhibition of AKT using chemical inhibitor or siRNA blocks the centrosome  
587 amplification in the colon cancer cells; **(E):** ROCK1 siRNA inhibits the centrosome  
588 amplification; **(F):** 14-3-3 $\sigma$  siRNA inhibits the centrosome amplification in normal  
589 human breast epithelial cells. **(G):** AKT inhibitor inhibits centrosome amplification;  
590 **(H):** AKT siRNA, ROCK1 siRNA and 14-3-3 $\sigma$  siRNA inhibit centrosome  
591 amplification in normal human breast epithelial cells. One way ANOVA analysis was  
592 used to compare multiple groups. \*\*:  $p < 0.01$ , compared with that in the control group;  
593 #:  $p < 0.01$ , compared with that in the samples treated with Glu, Ins and Pal. Glu:  
594 glucose, 15 mM; Ins: insulin, 5 nM; Pal: palmitic acid, 150  $\mu$ M; Ly294002: 30  $\mu$ M.

595

596

597 **Fig. 4.**

598 **AKT-ROS-dependent signaling of ROCK1 and 14-3-3 $\sigma$  is the molecular pathway**  
599 **for the centrosome amplification. (A) and (B):** AKT chemical inhibitor and siRNA  
600 inhibit ROS production, respectively; (C): AKT chemical inhibitor or siRNA inhibits  
601 ROCK1 upregulation; (D): AKT chemical inhibitor or SiRNA inhibits 14-3-3 $\sigma$   
602 upregulation; (E) and (F): NAC inhibits the upregulation of ROCK1 and 14-3-3 $\sigma$ ,  
603 respectively. Glu: glucose, 15 mM; Ins: insulin, 5 nM; Pal: palmitic acid, 150  $\mu$ M;  
604 Ly294002, 30  $\mu$ M; NAC: 3 mM.

605

606 **Fig. 5.**

607 **High glucose, insulin and palmitic acid increase the binding between ROCK1**  
608 **and 14-3-3 $\sigma$  as well as their centrosome translocation. (A):** use of ROCK1 or  
609 14-3-3 $\sigma$  antibodies to pull down their binding partner, and the influences of Ly294002  
610 and NAC; (B) and (C): quantification of the gel images of Western blot analysis  
611 shown in Fig. 5A; (D): confocal image of ROCK1 localization in the centrosomes;  
612 (E): confocal image of 14-3-3 $\sigma$  localization in the centrosomes; (F): high glucose,  
613 insulin and palmitic acid increases level of ROCK1 localization in the centrosomes,  
614 which is inhibited by AKT inhibitor and NAC but not 14-3-3 $\sigma$  siRNA; (G):  
615 experimental treatment increases the localization of 14-3-3 $\sigma$  to the centrosomes,  
616 which is inhibited by AKT inhibitor, NAC or ROCK1 siRNA. One way ANOVA  
617 analysis was used to compare multiple groups. \*\*:  $p < 0.01$ , compared with that in the  
618 control group; #:  $p < 0.01$ , compared with that in the samples treated with Glu, Ins  
619 and Pal. Glu: glucose, 15 mM; Ins: insulin, 5 nM; Pal: palmitic acid, 150  $\mu$ M;  
620 Ly294002, 30  $\mu$ M; NAC, 3 mM.

621

622 **Fig. 6.**

623 **The increases in AKT activation and ROS production as well as expression,**  
624 **binding and centrosome distribution of ROCK1 and 14-3-3 $\sigma$  are confirmed in**  
625 **the PBMC from the patients with type 2 diabetes. (A):** AKT activation as well as  
626 expressions of ROCK1 and 14-3-3 $\sigma$  are increased in PBMC from the patients; (B):

627 ROS production is increased in the PBMC from the patients; **(C)**: binding between  
628 ROCK1 and 14-3-3 $\sigma$  is increased in PBMC from the diabetic patients; **(D)** and **(E)**:  
629 centrosome distributions of ROCK1 and 14-3-3 $\sigma$  are increased in the PBMC from the  
630 type 2 diabetic patients, respectively. For Western blot analyses and  
631 co-immunoprecipitation, five clinical samples were randomly selected and combined  
632 for the experiments. ROS quantification was performed in triplicate using different  
633 samples. One way ANOVA analysis was used to compare multiple groups. \*\*: p <  
634 0.01.

Table 1. Clinical and biochemical characteristics of the volunteers

|                                      | Healthy subject | Diabetic patient |
|--------------------------------------|-----------------|------------------|
| n                                    | 12              | 32               |
| Age (years)                          | 57±2            | 55±2             |
| Sex ratio (male:female)              | 1:1             | 1:1              |
| Body mass index (kg/m <sup>2</sup> ) | 19.8±2.7        | 26.7±5*          |
| Systolic blood pressure (mmHg)       | 133.3±5.7       | 131.7±17.2       |
| Diastolic blood pressure (mmHg)      | 76.6±11.5       | 83.3±10.3        |
| Fasting blood glucose (mmol/l)       | 5.3±0.3         | 10.1±3.7*        |
| HbA1c (%)                            | 5.6±            | 8.5±2.2*         |
| Total cholesterol (mmol/l)           | 2.8±1.4         | 4.9±1.4          |
| Triglyceride (mmol/l)                | 0.66(0.2-1.1)   | 2.3(1.2-3.5)*    |

Data are means ± SD, or medians (range). \*p<0.05

Fig. 1A

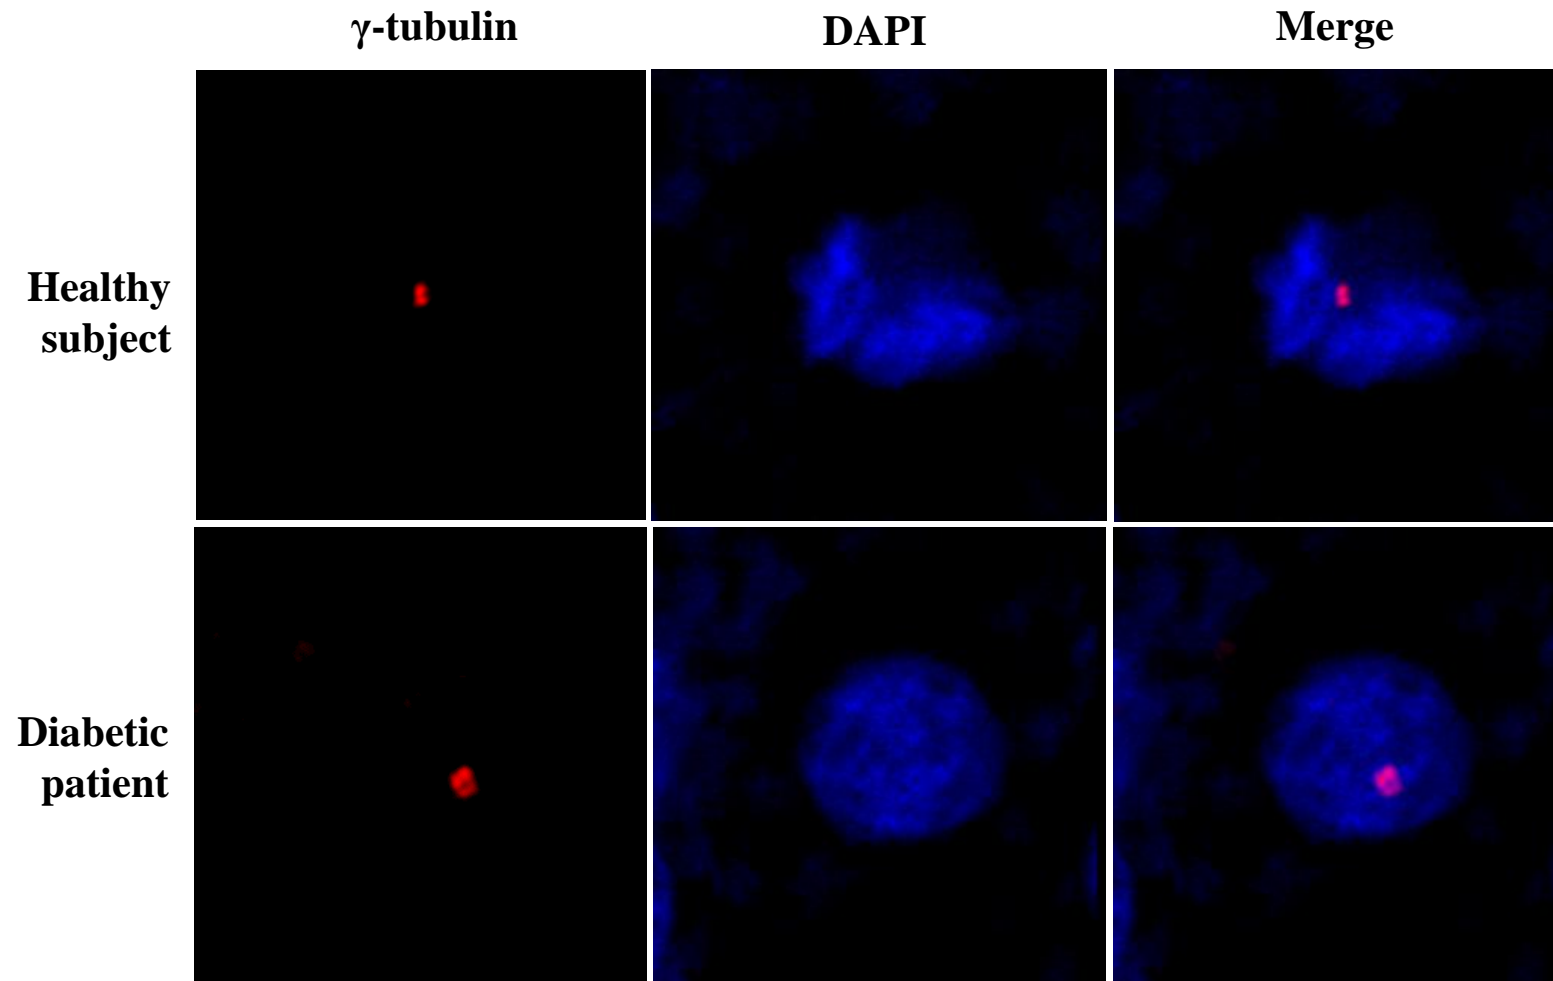



Fig. 1B

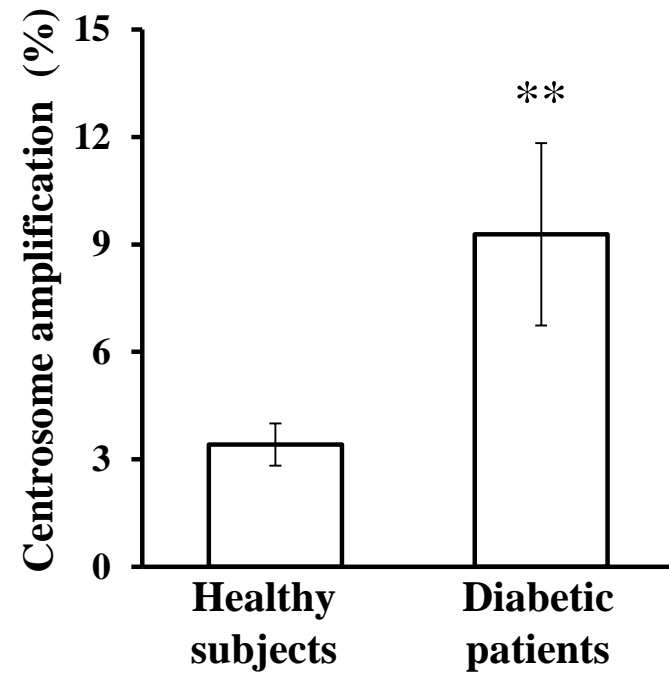

Fig. 1C

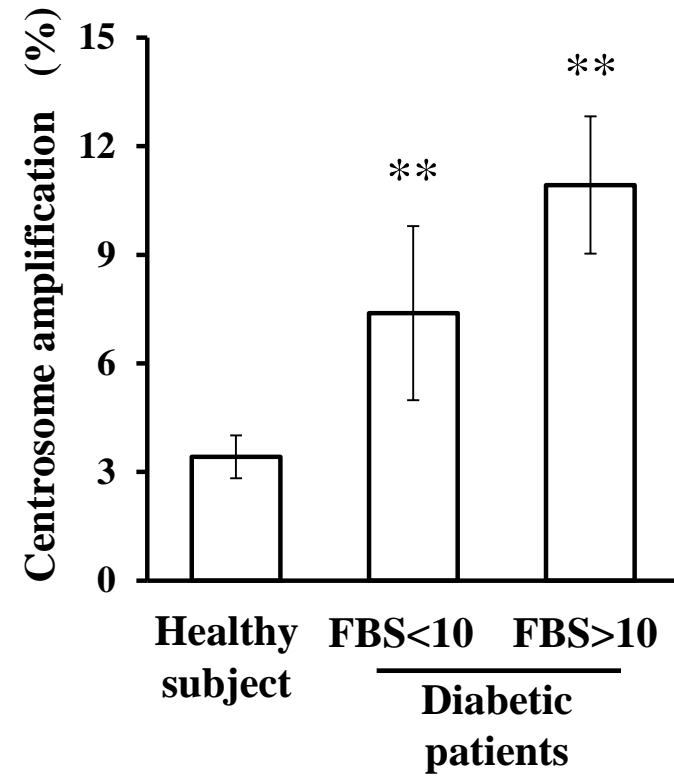

Fig. 1D

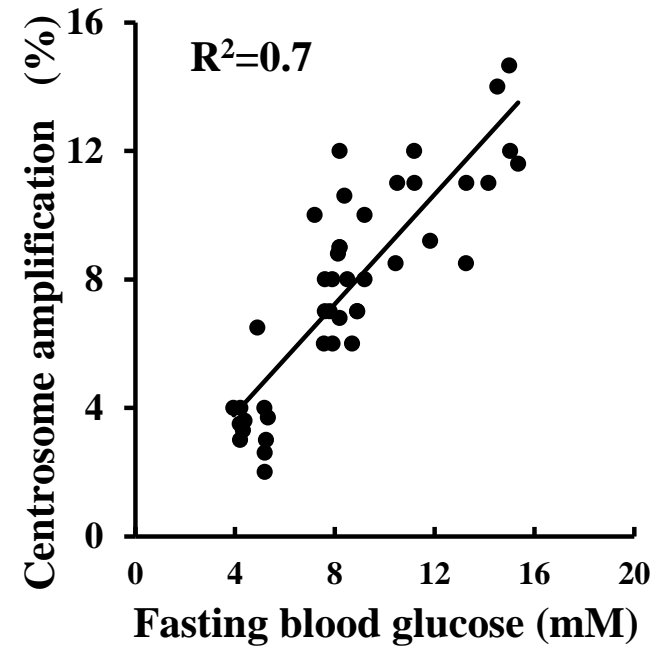

Fig. 1E

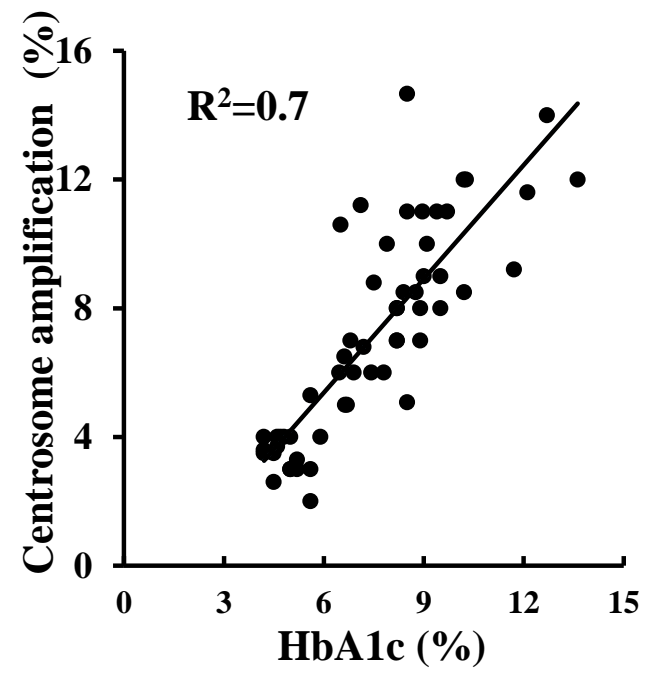

Fig. 1F

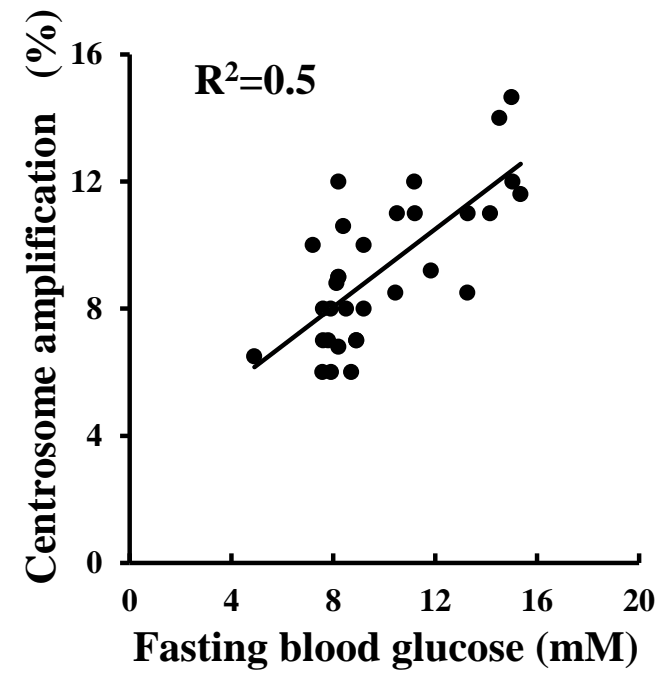

Fig. 1G

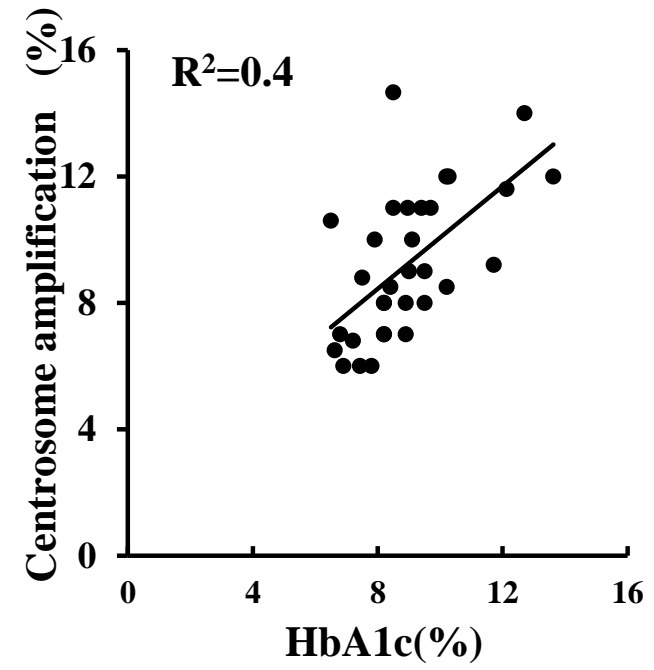

Fig. 2A

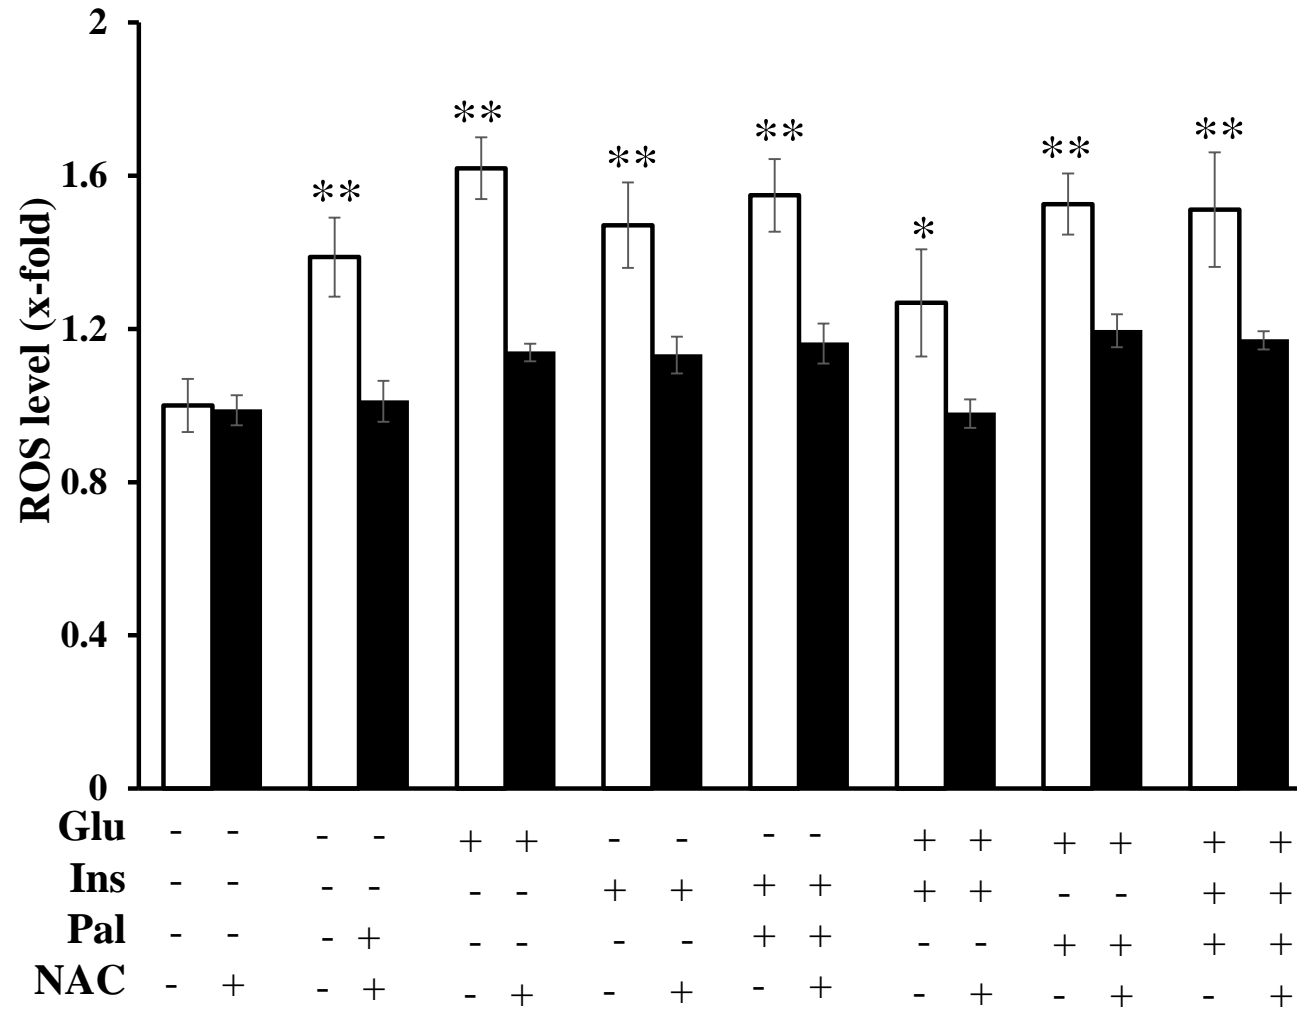

Fig. 2B

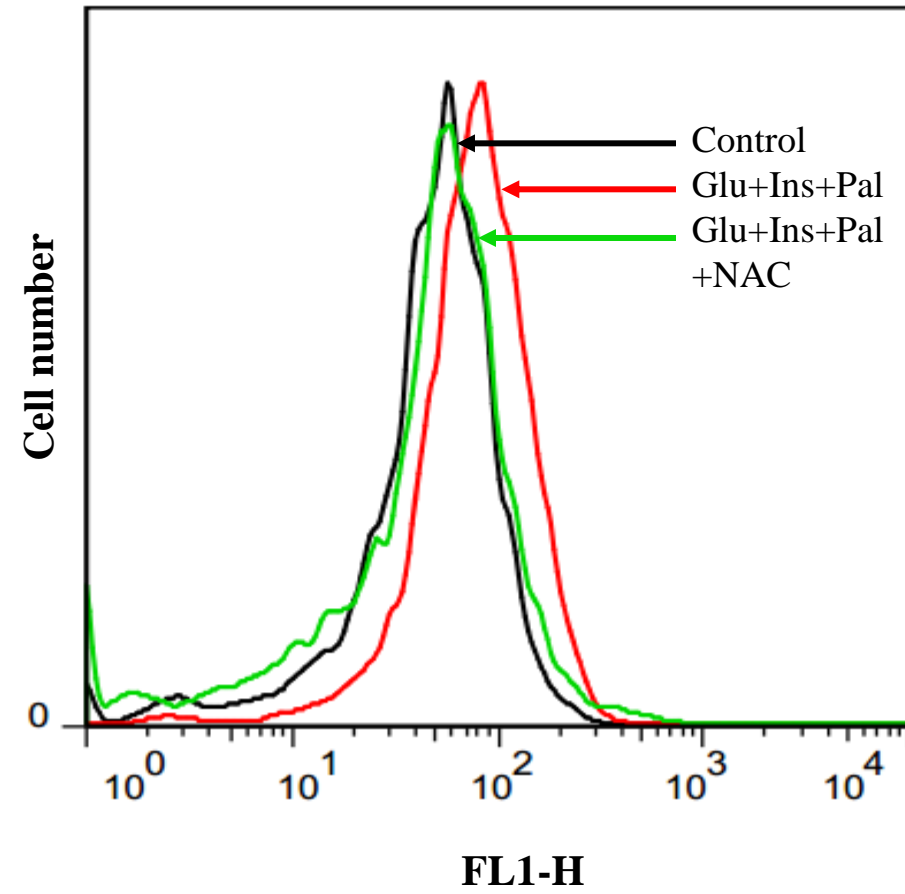



Fig. 2C

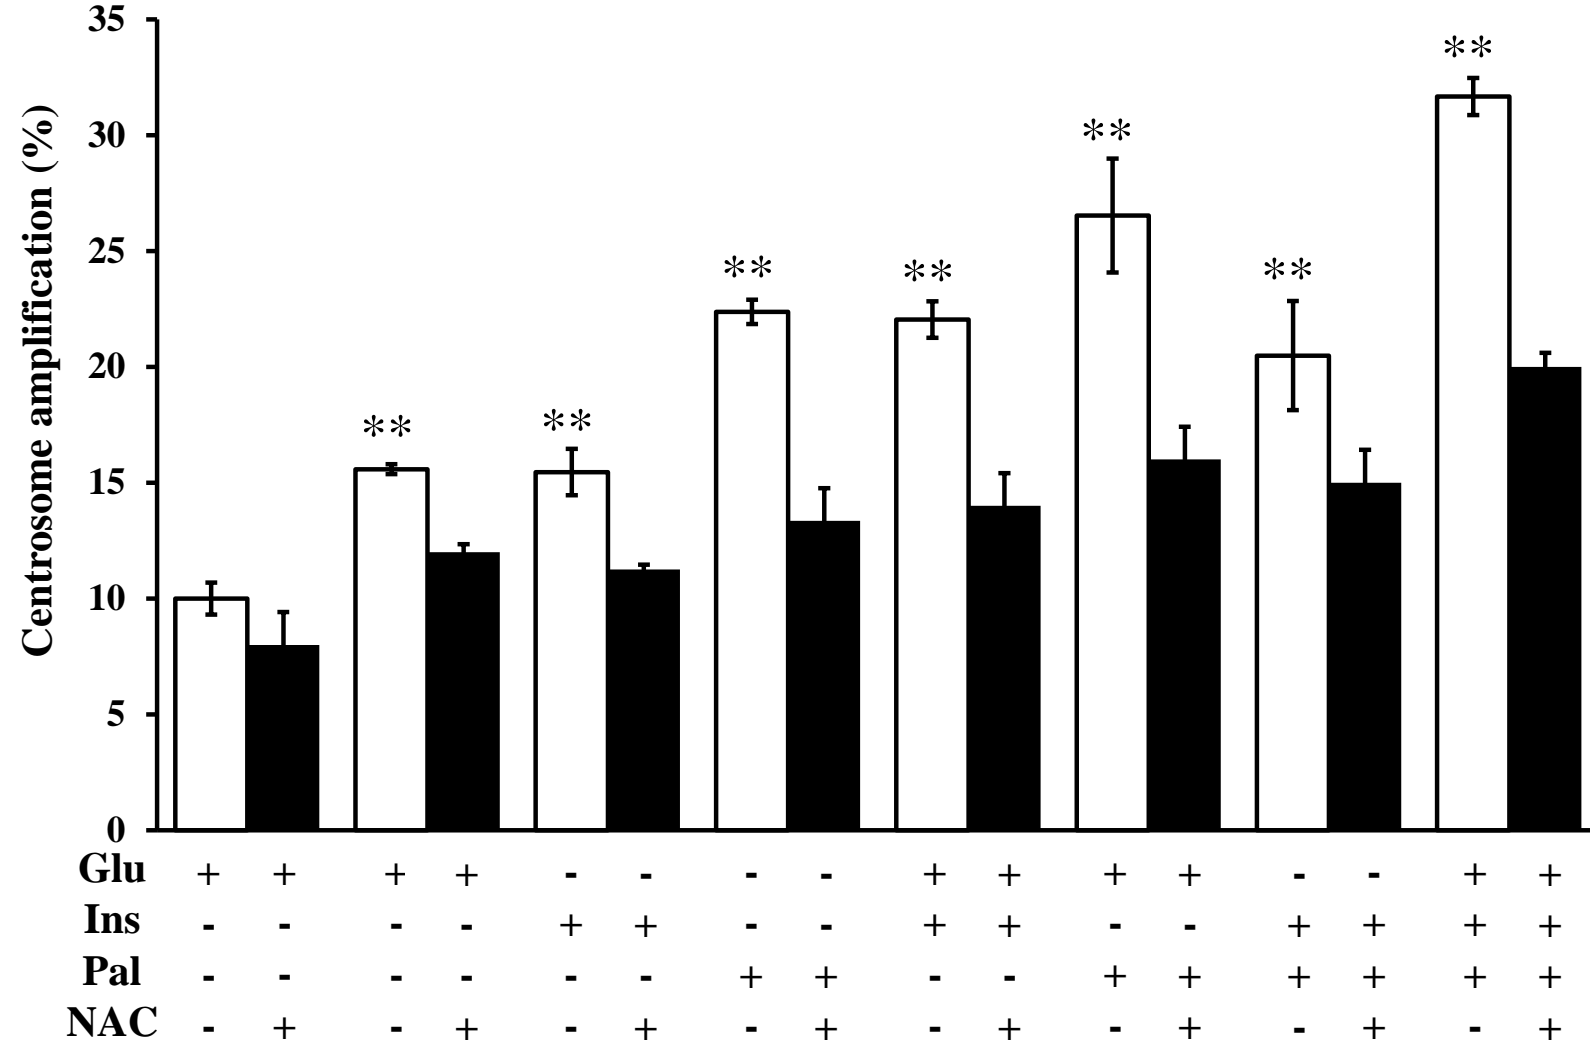

Fig. 2D

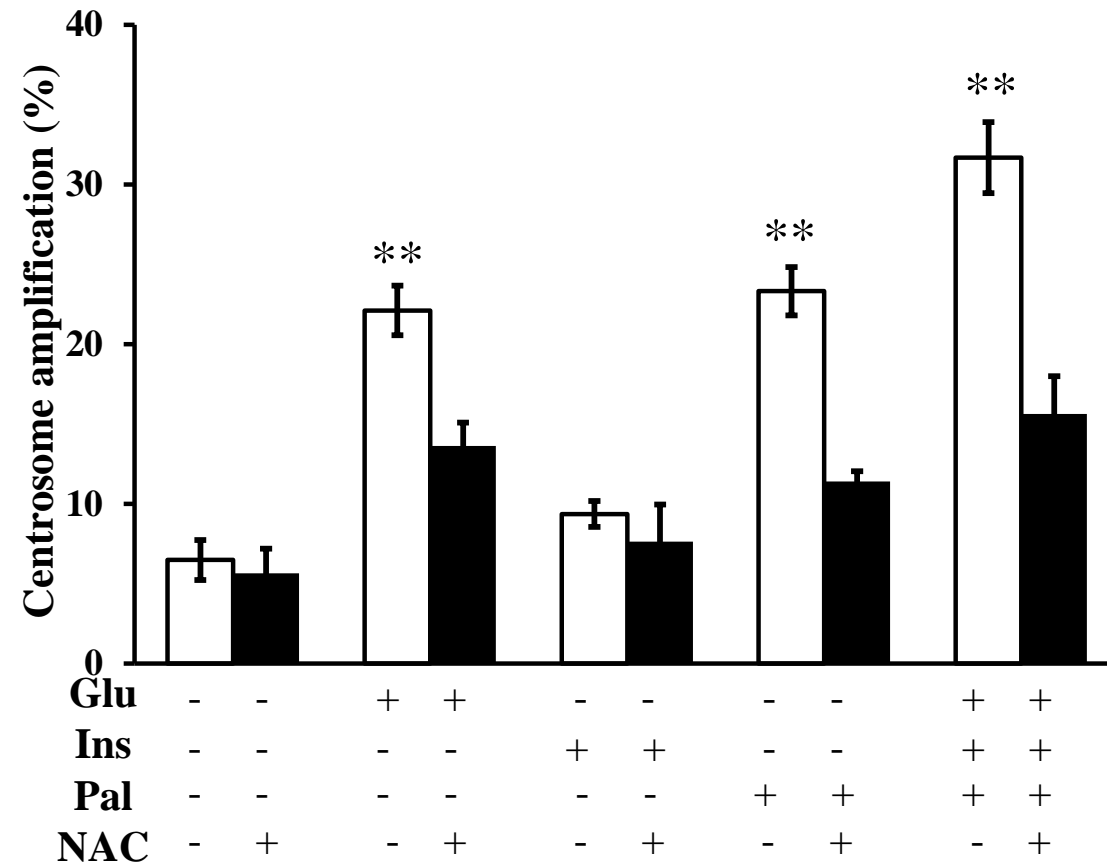

Fig. 3A

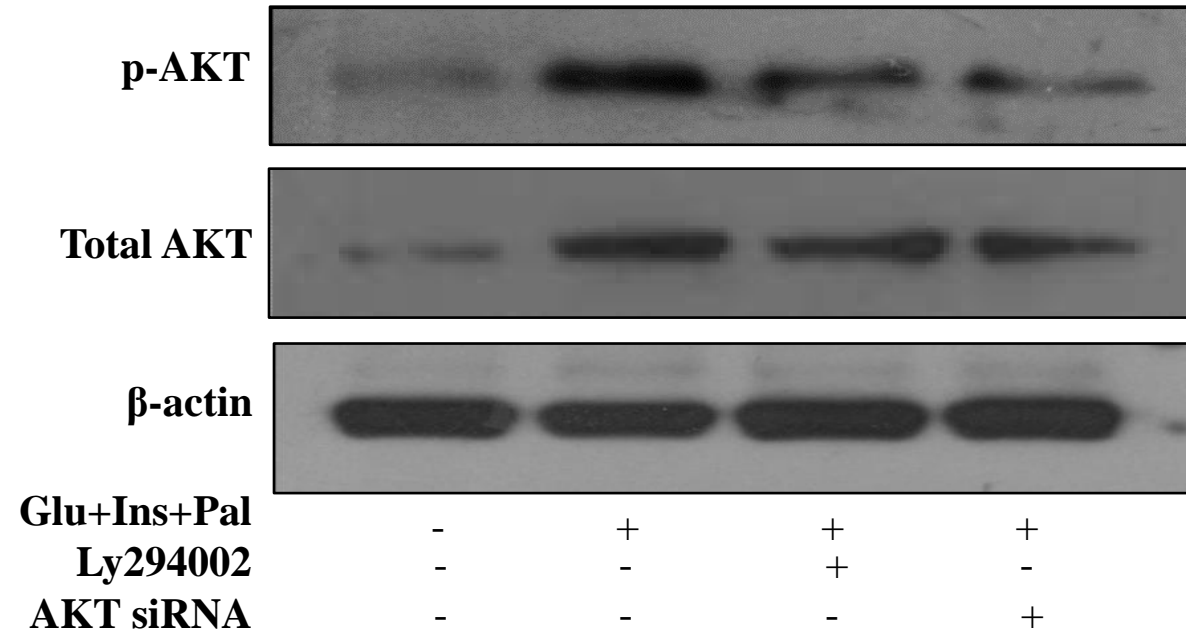

Fig. 3B

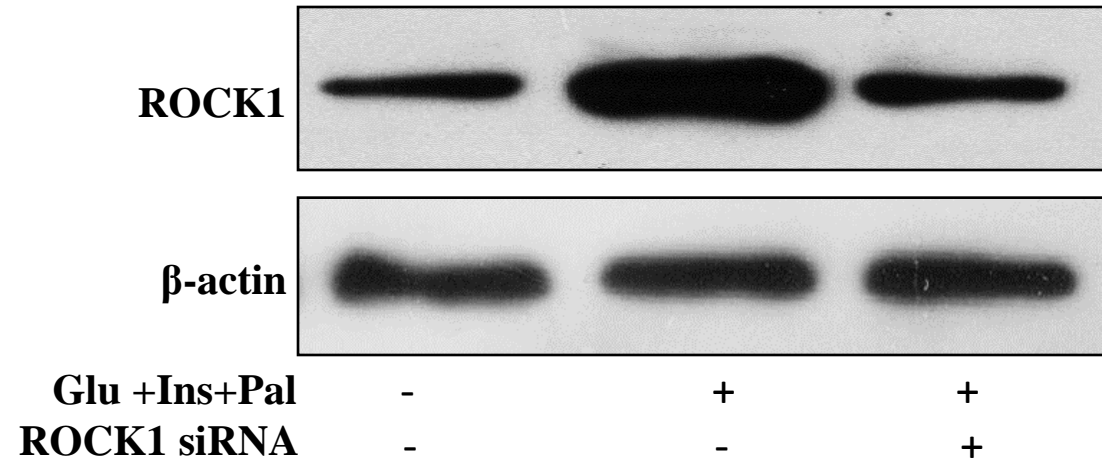

Fig. 3C

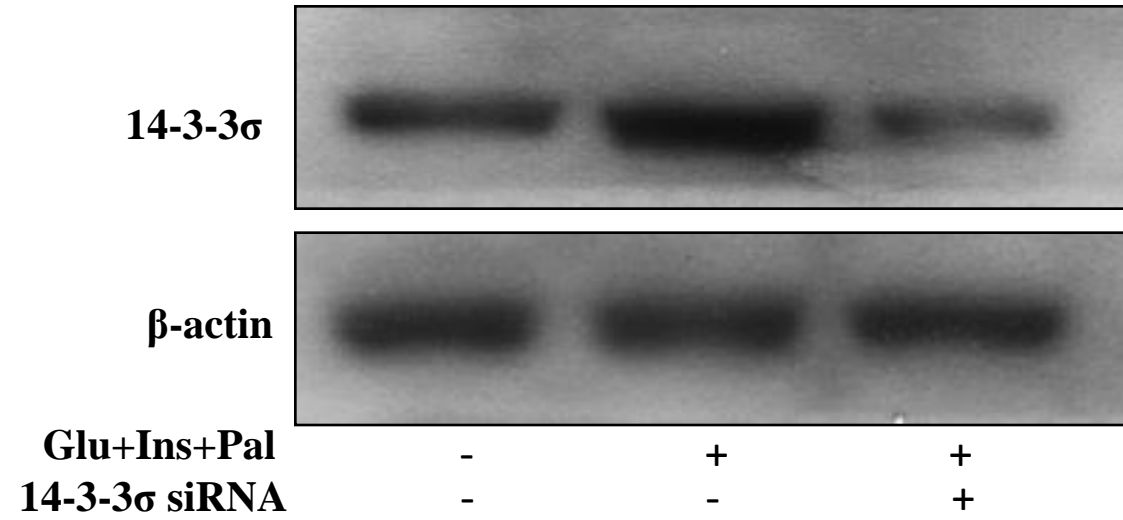

Fig. 3D

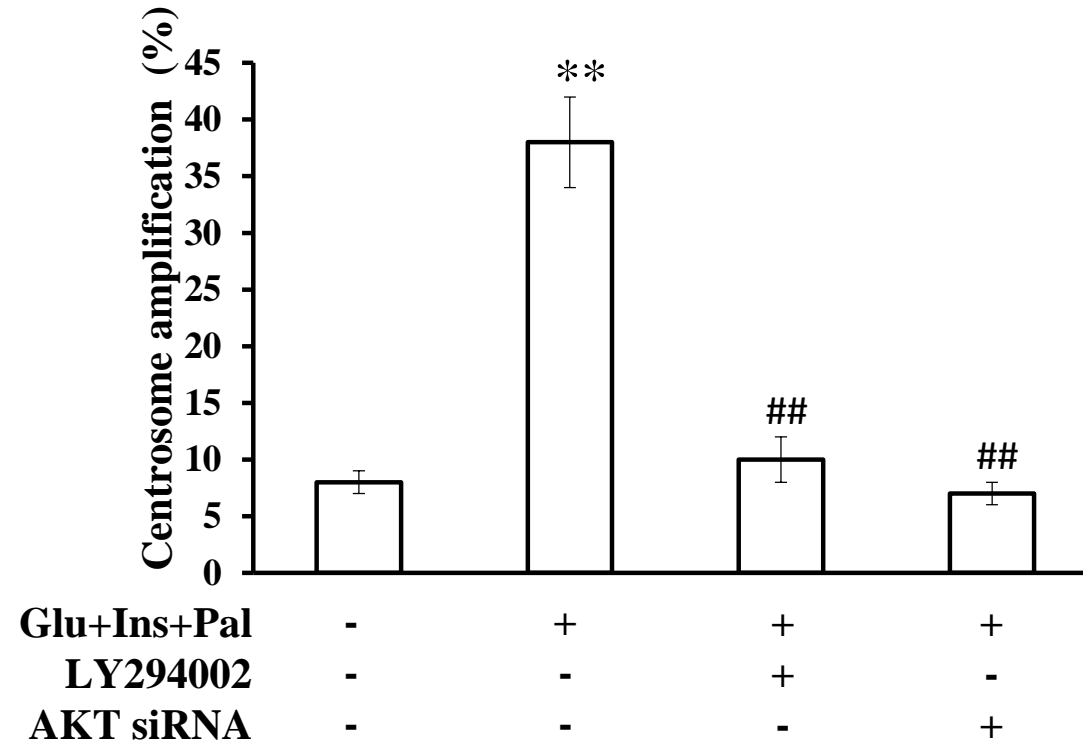

Fig. 3E

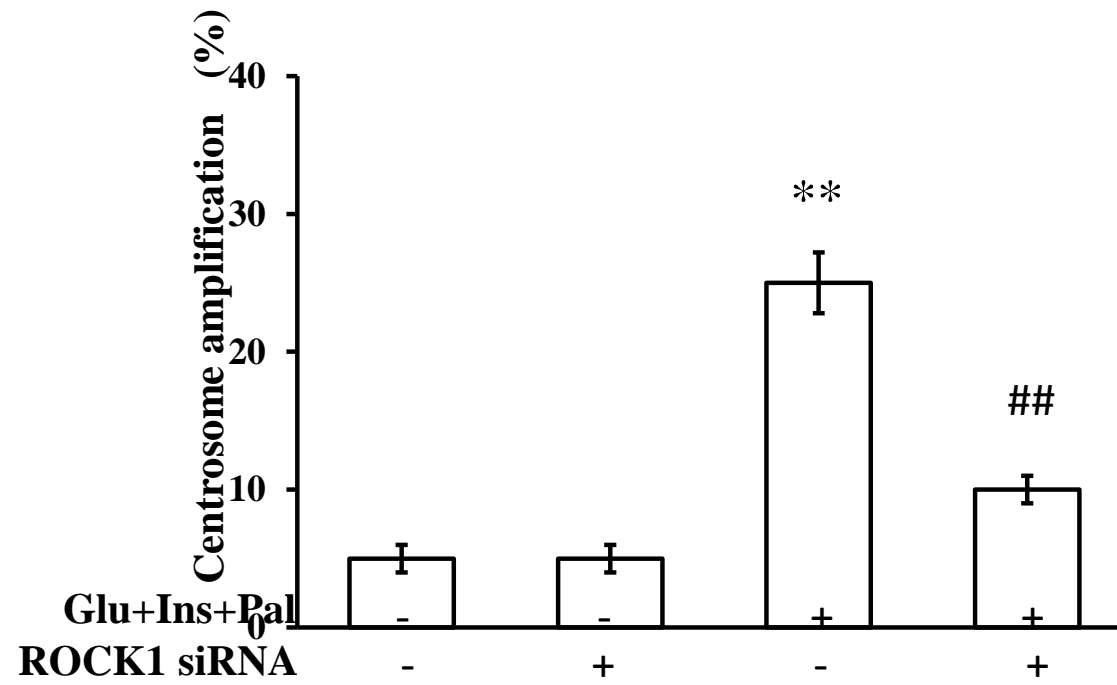

Fig. 3F

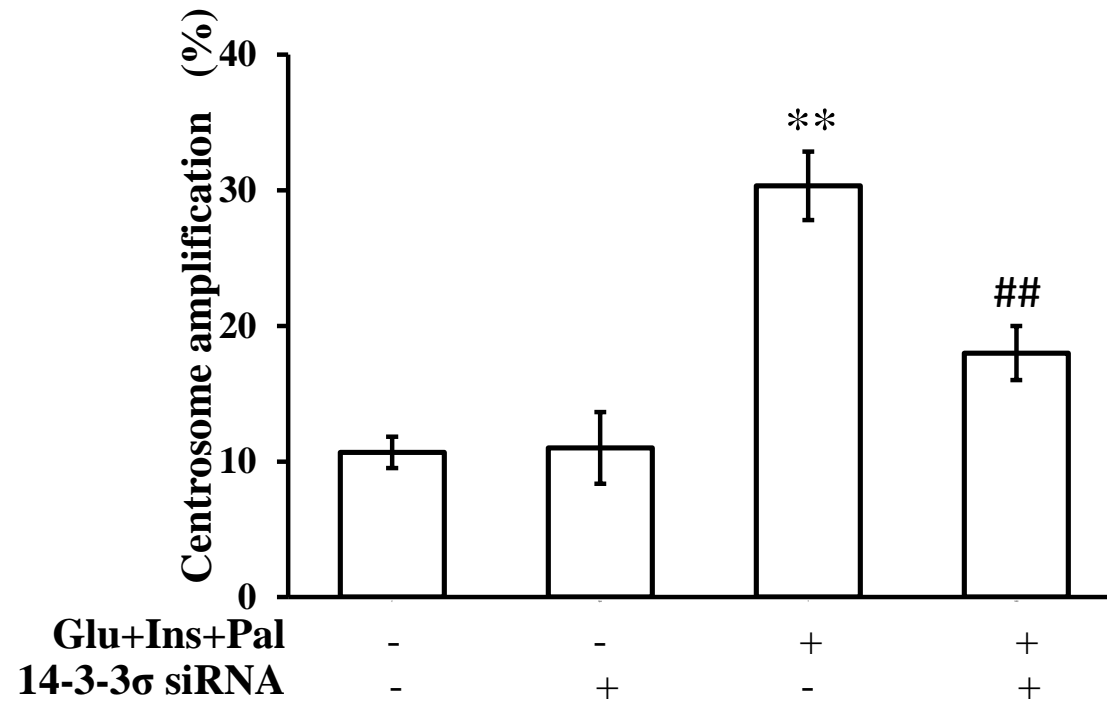



Fig. 3G

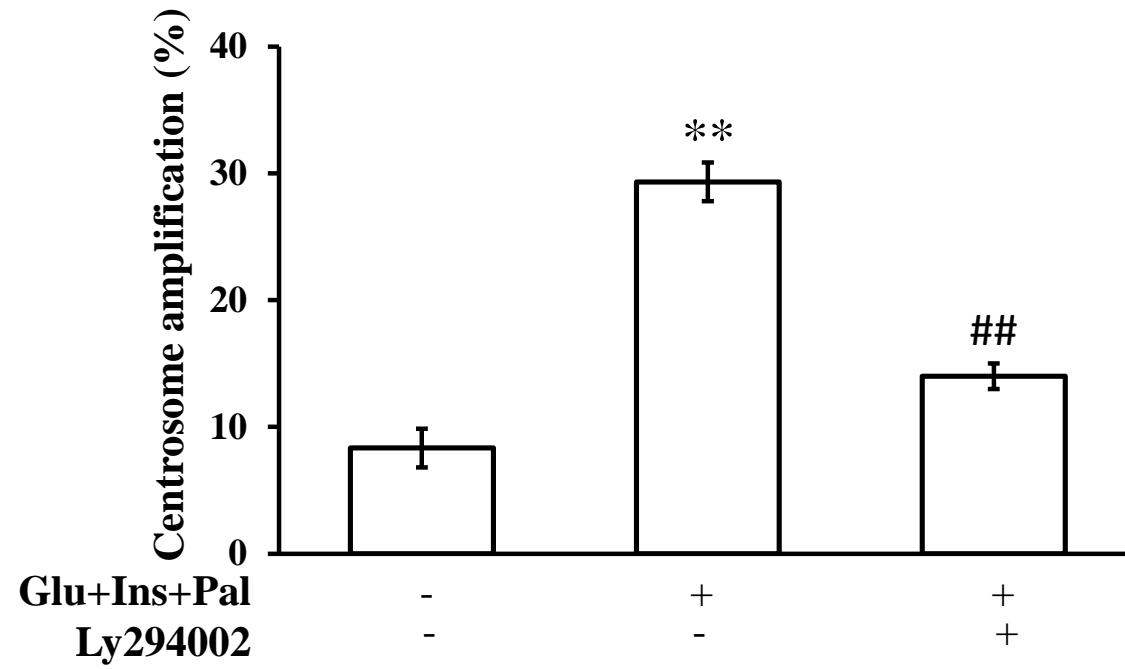

Fig. 3H

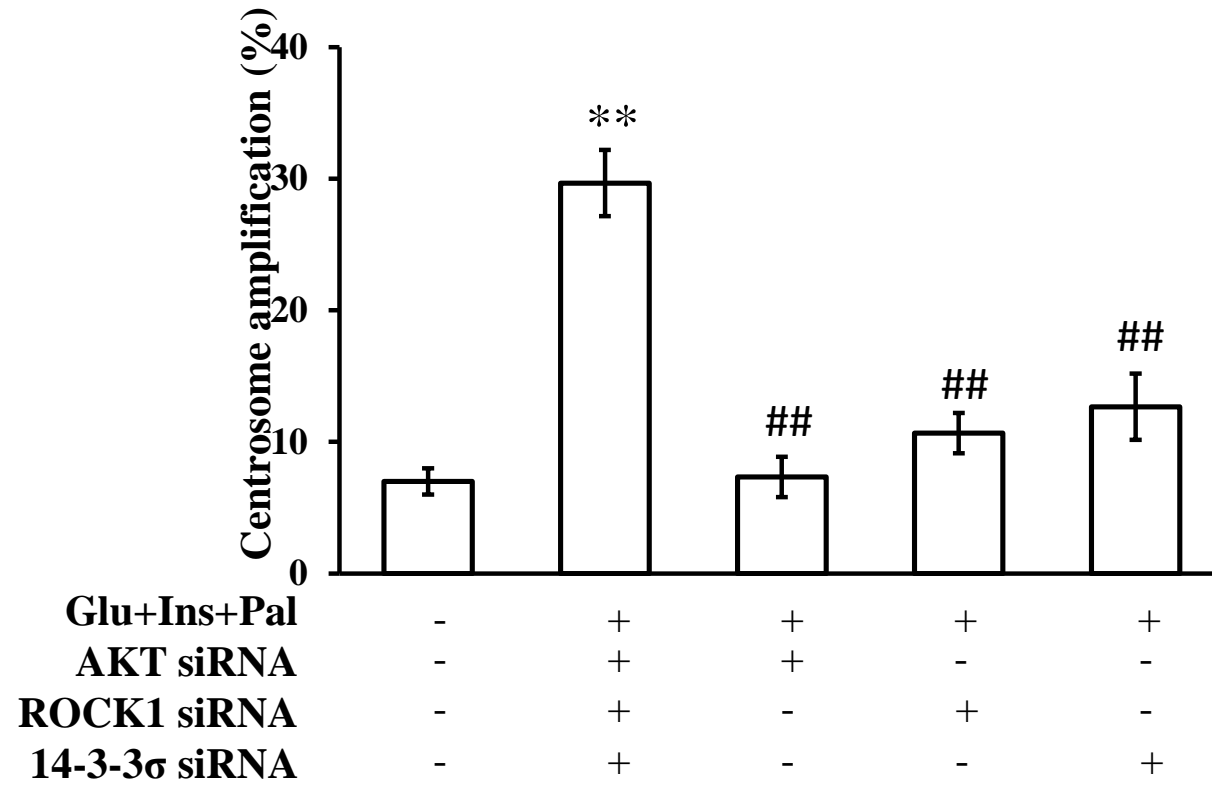

Fig. 4A

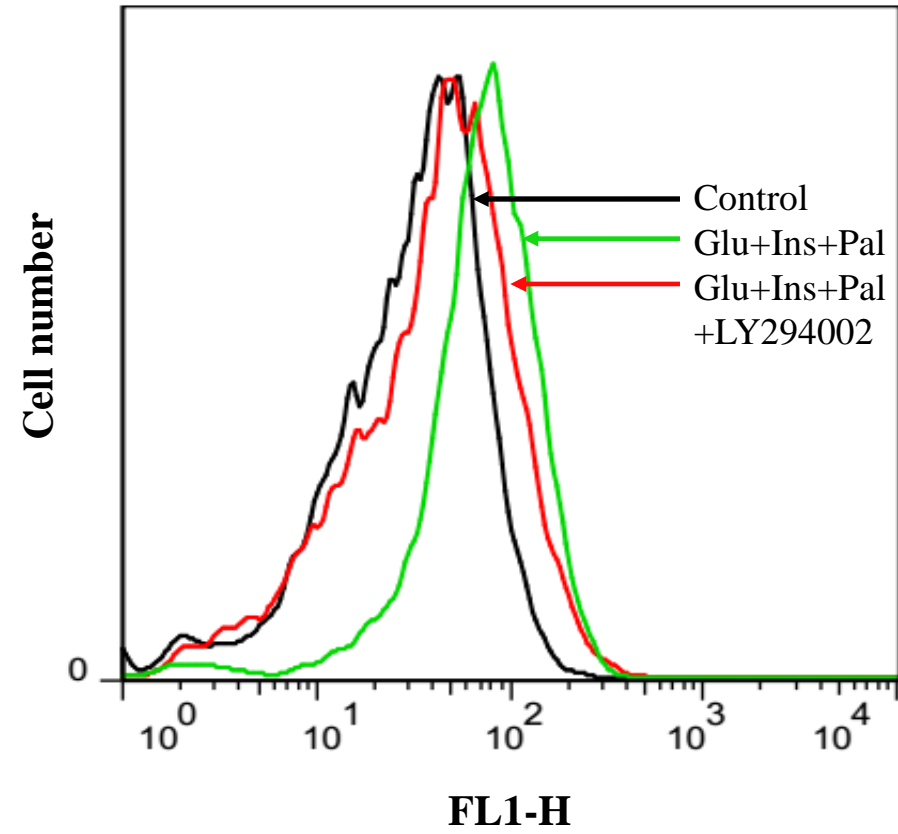

Fig. 4B

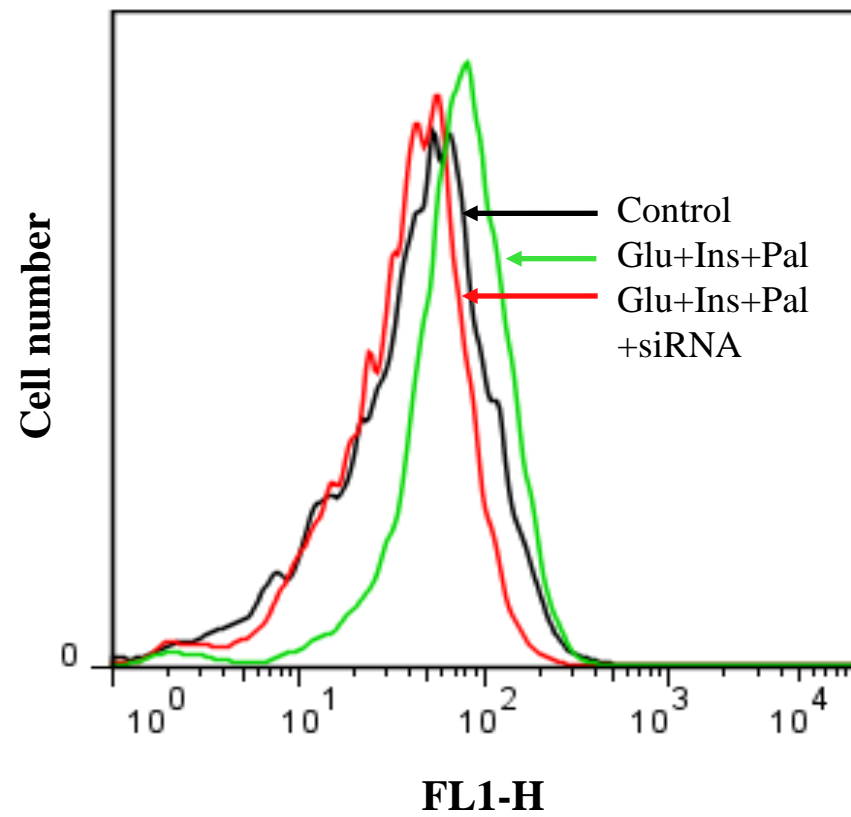

Fig. 4C

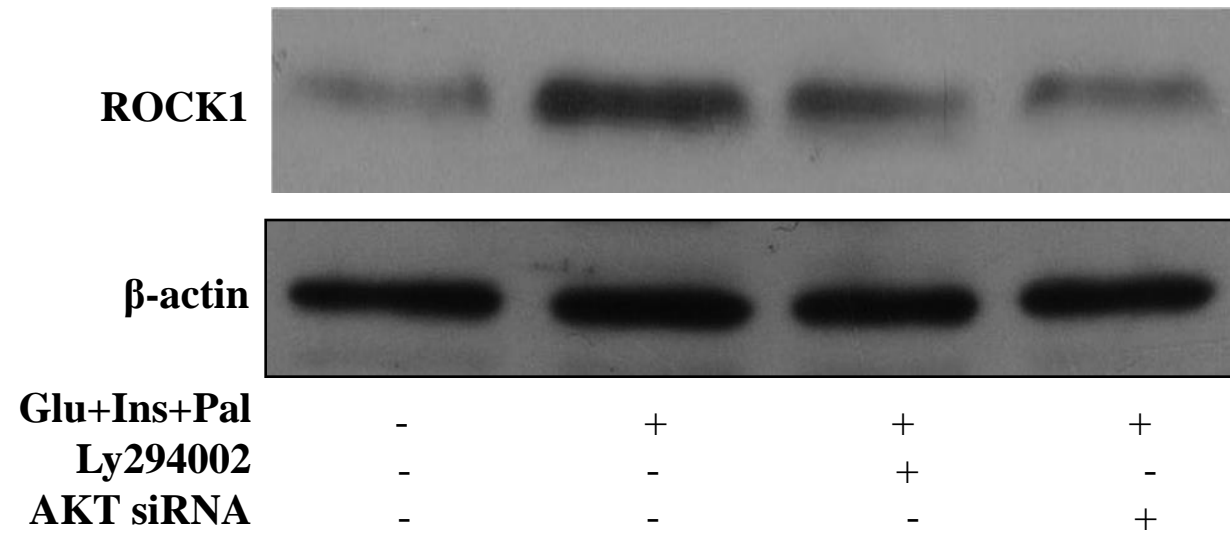

Fig. 4D

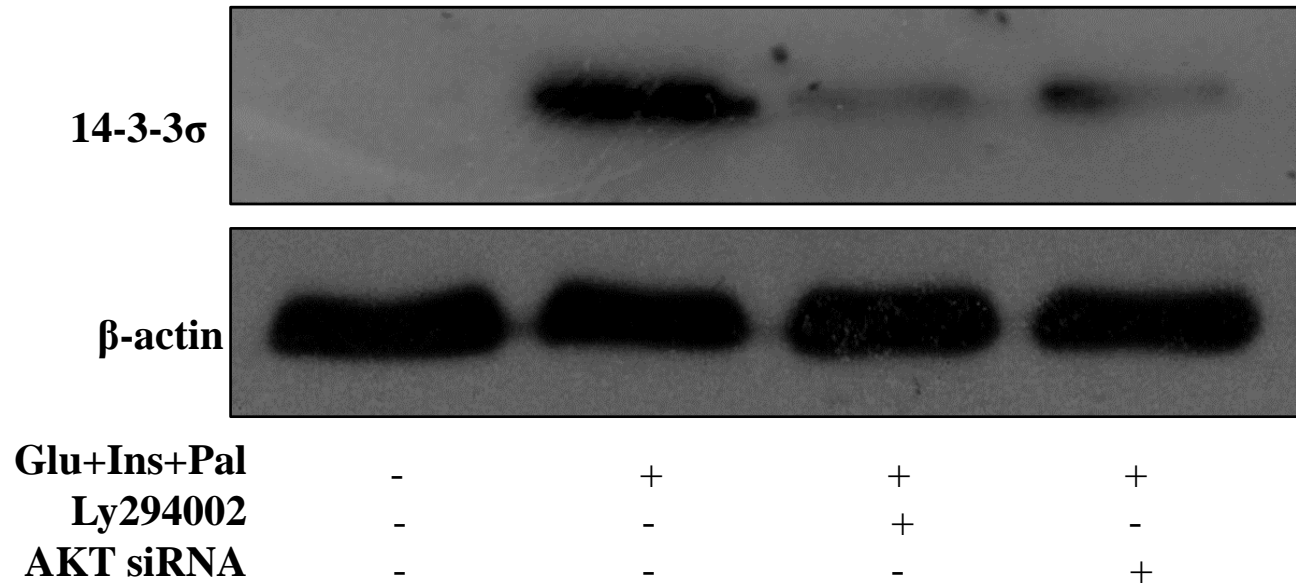

Fig. 4E

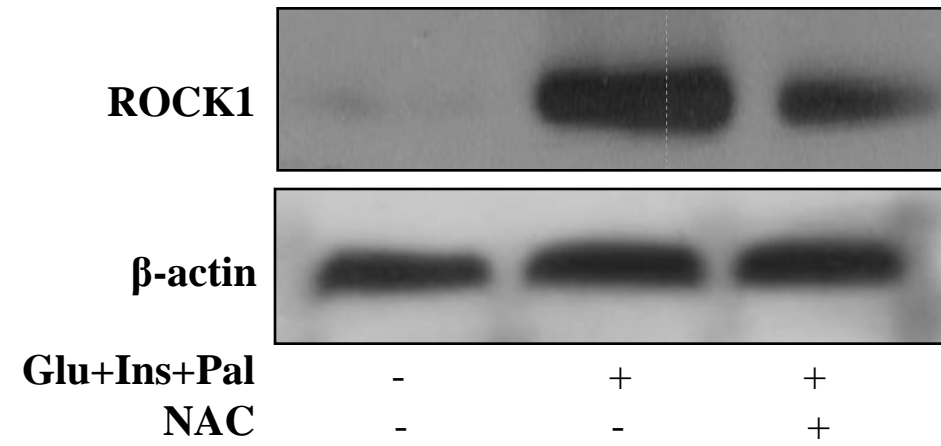

Fig. 4F

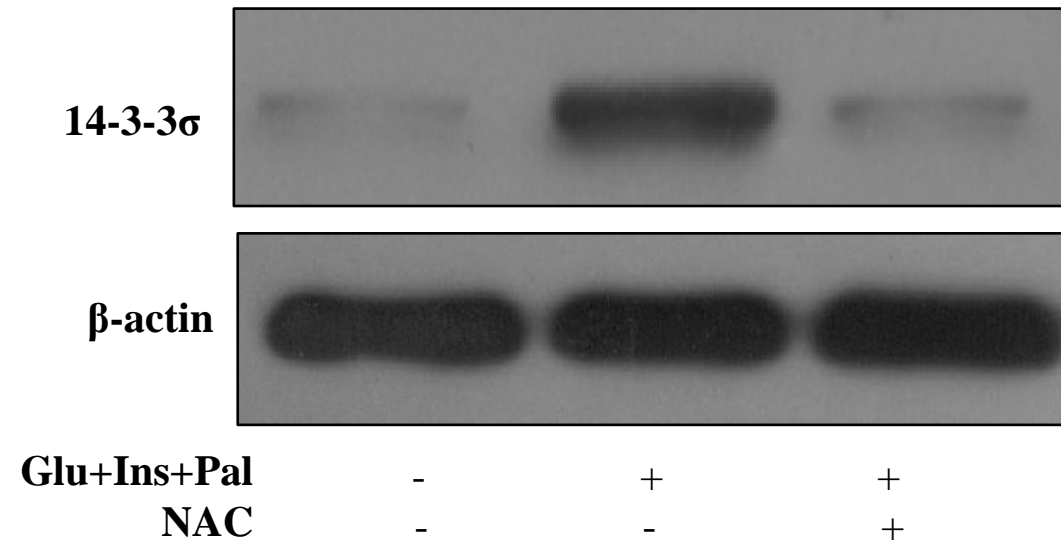



Fig. 5A

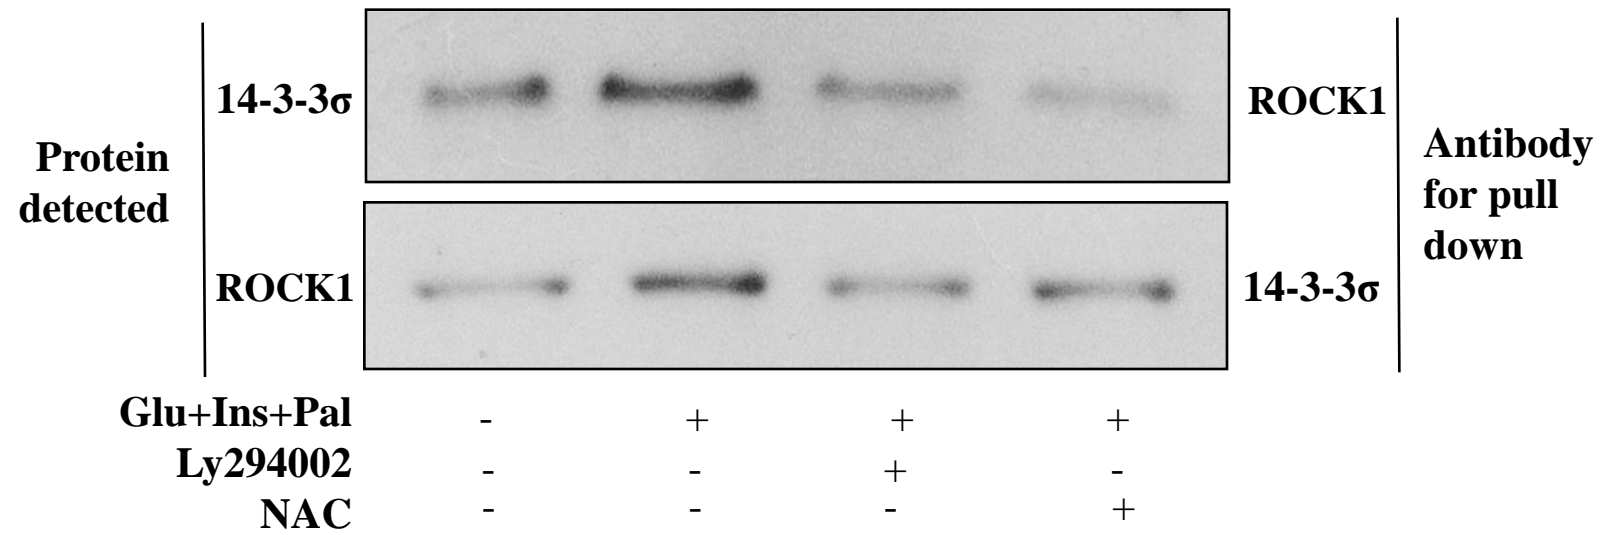

Fig. 5B

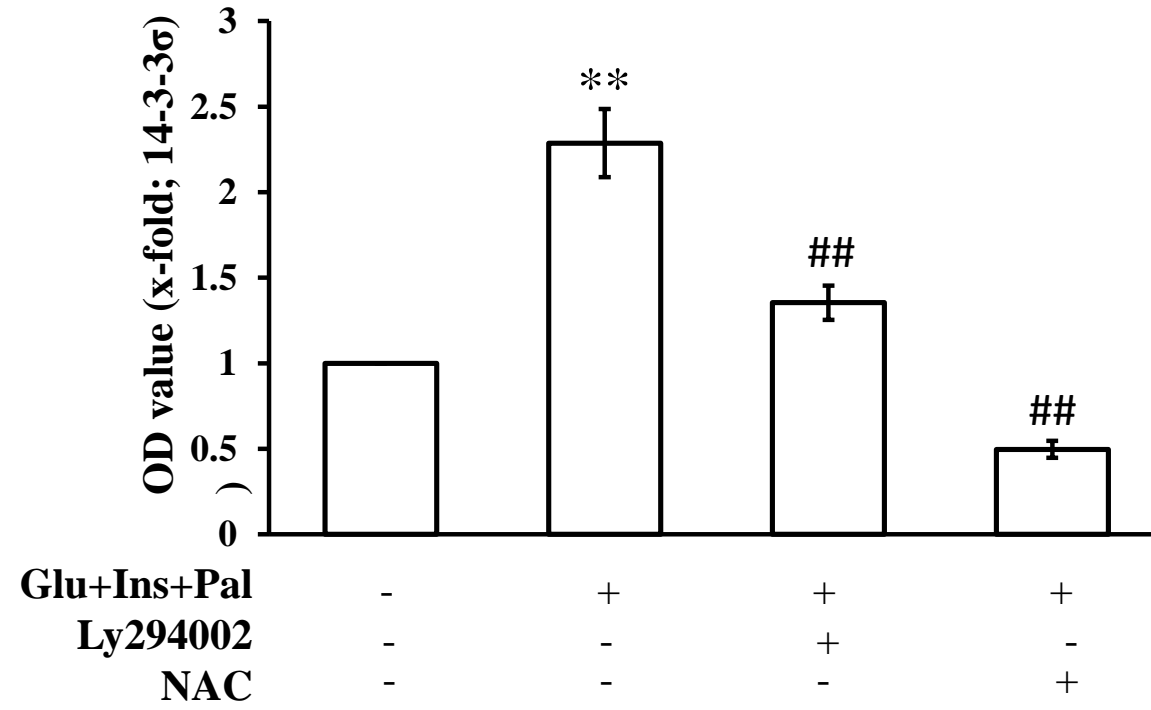

Fig. 5C

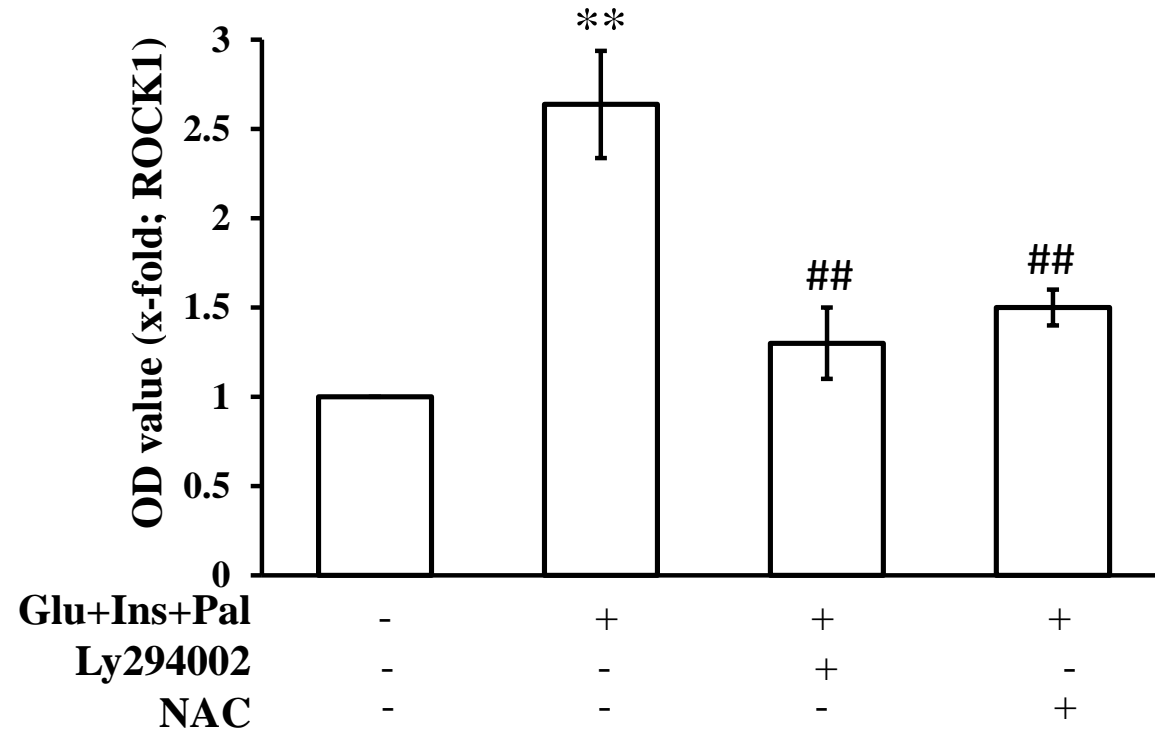

Fig. 5D

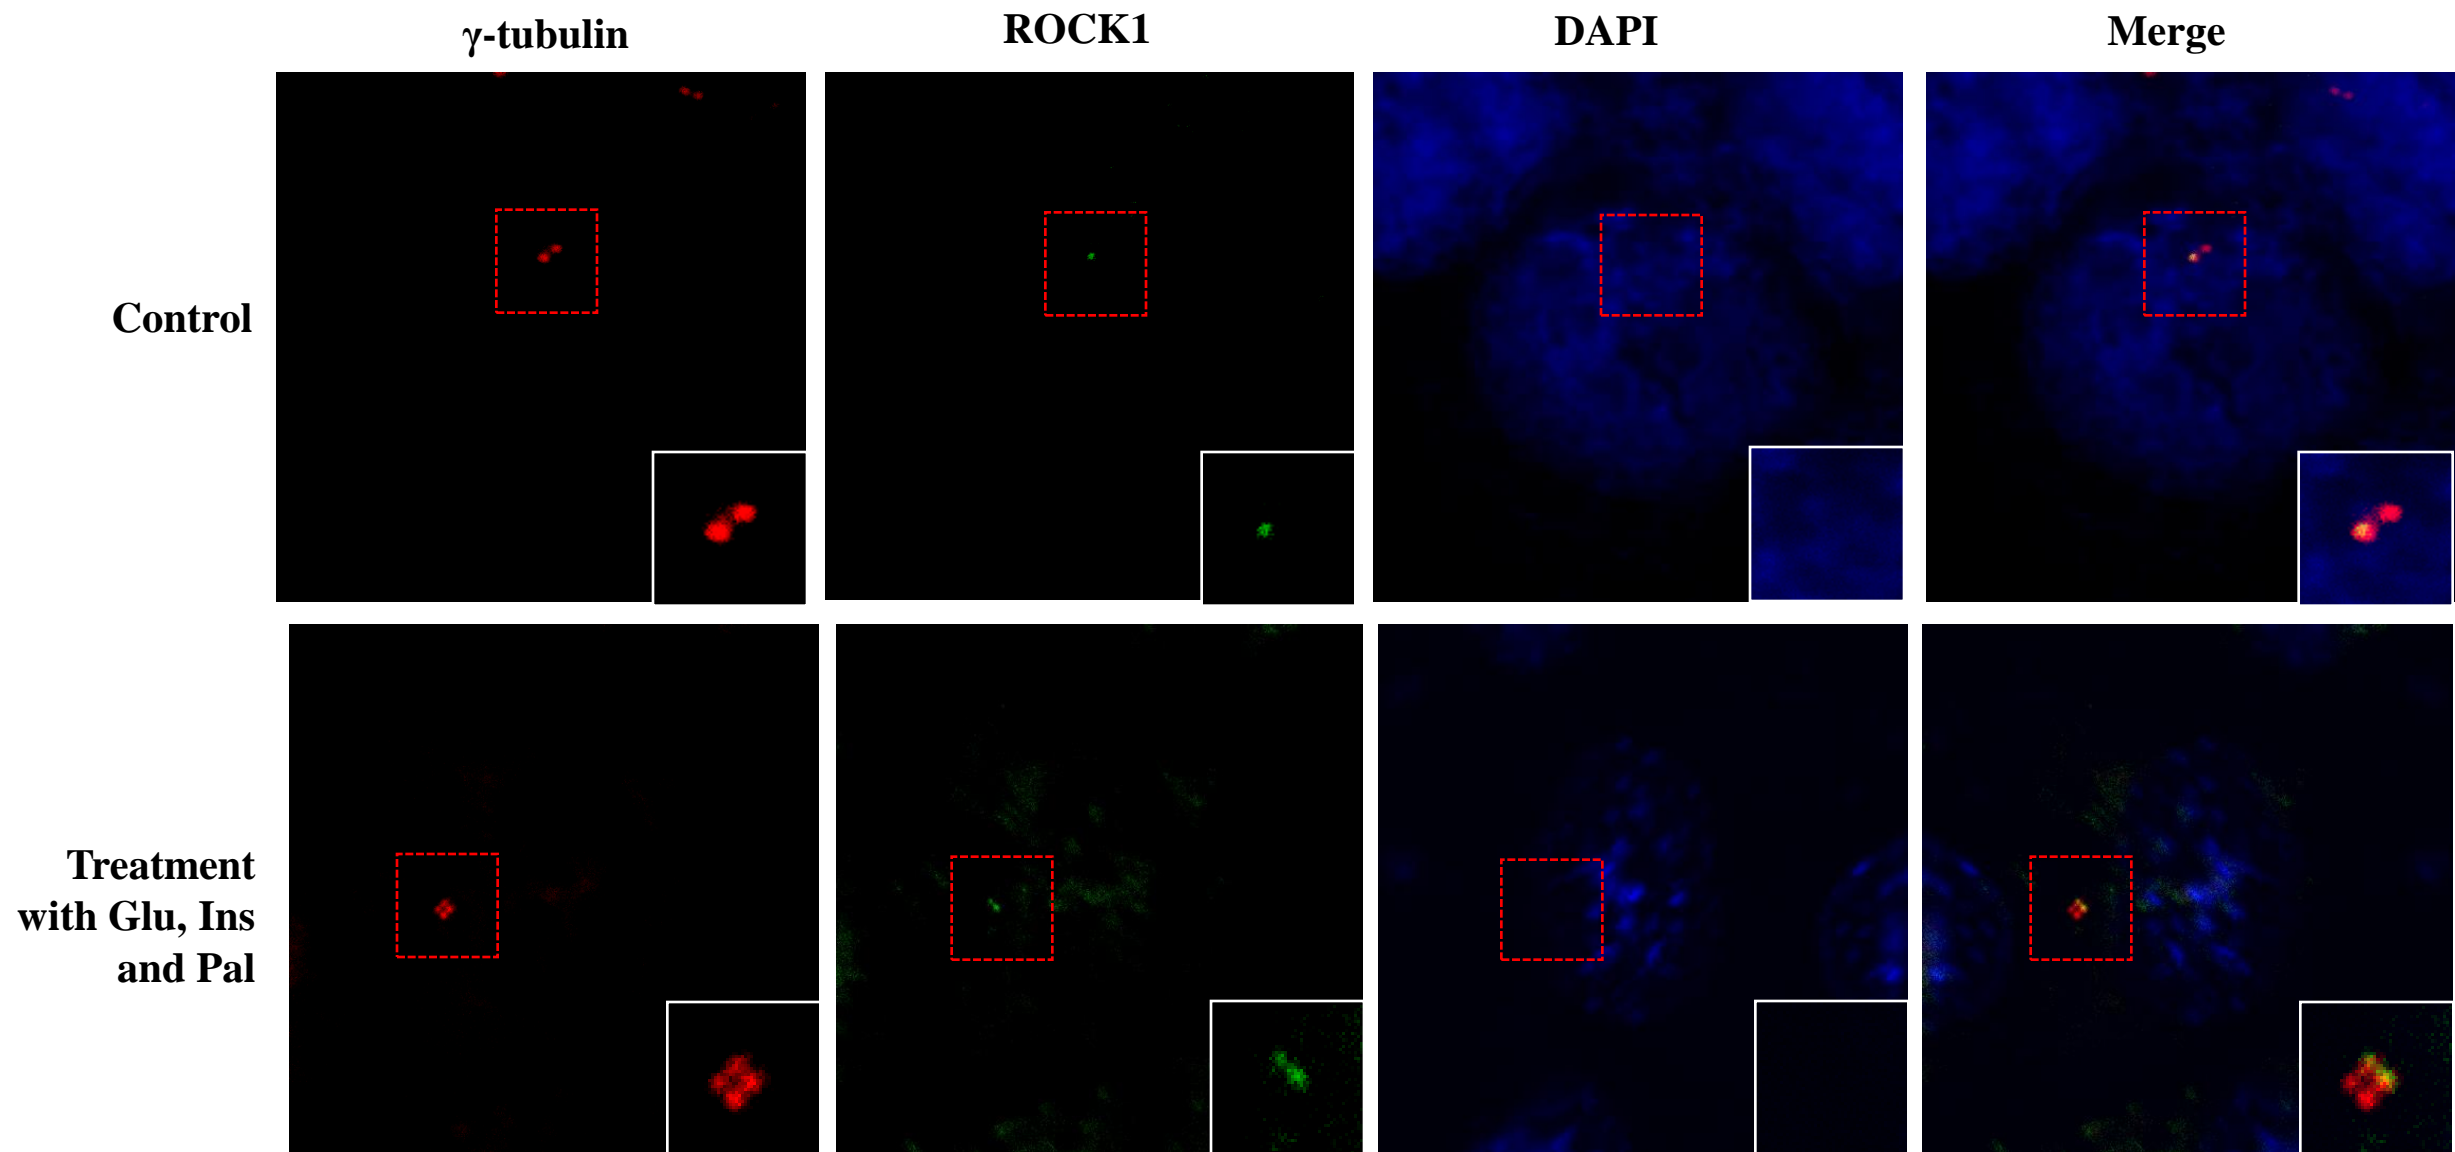

Fig. 5E

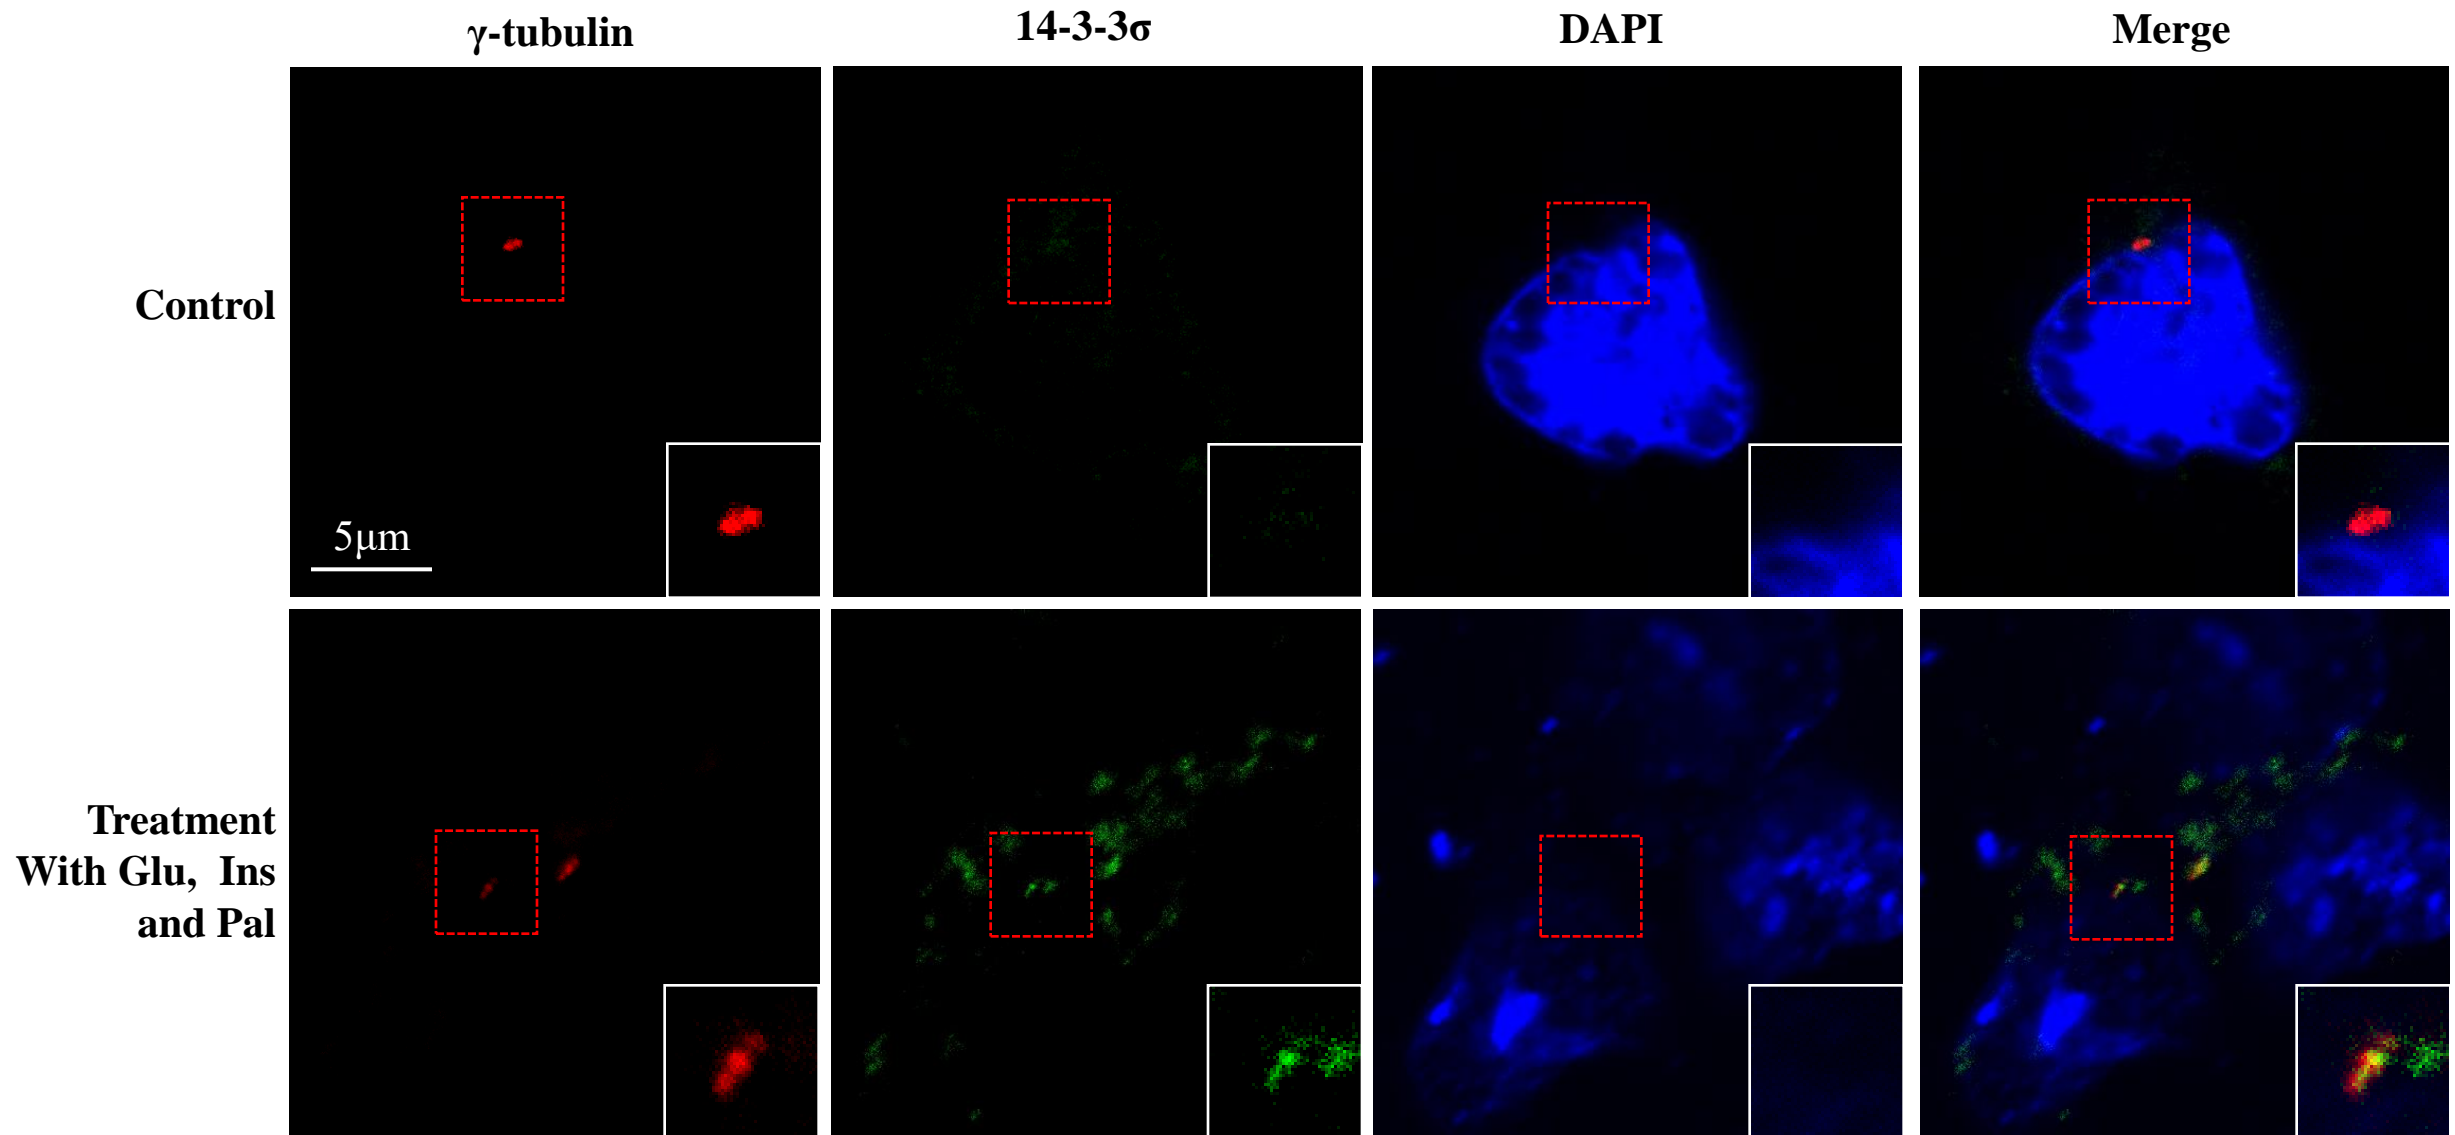

Fig. 5F

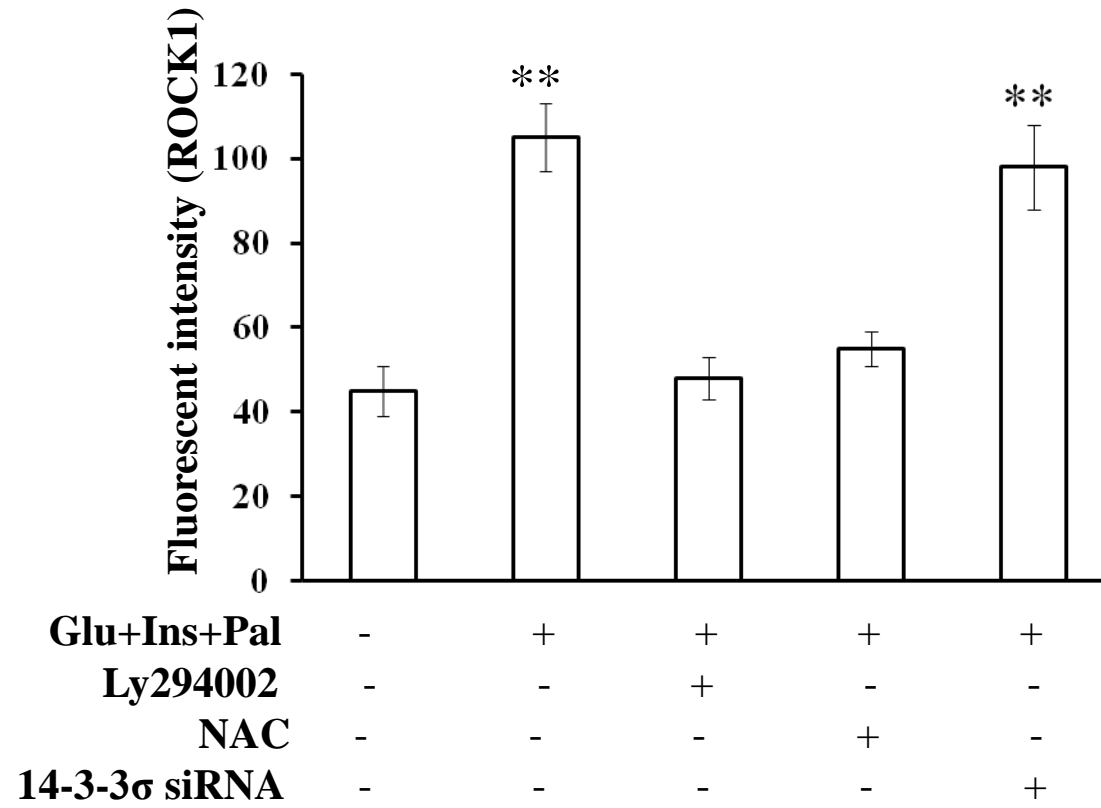

Fig. 5G

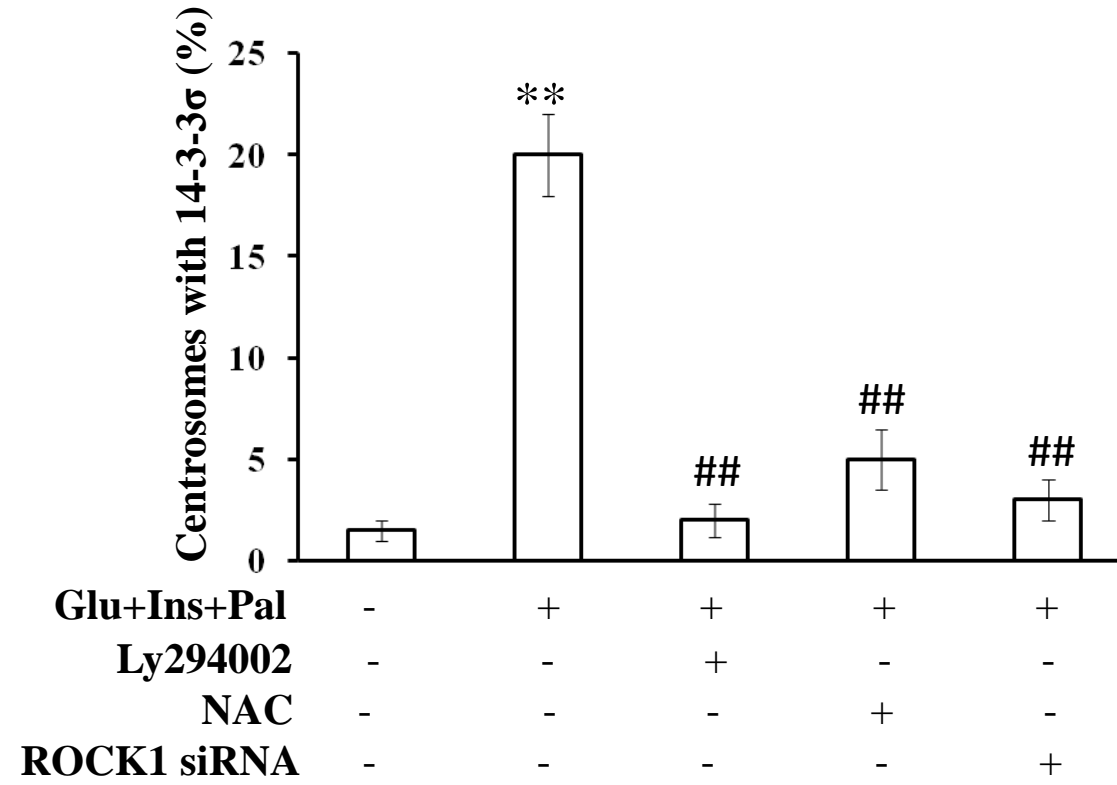

Fig. 6A

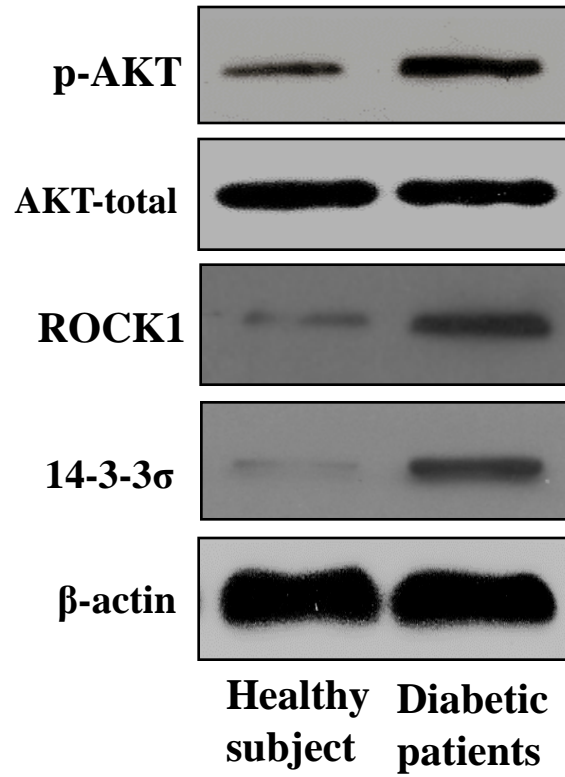



Fig. 6B

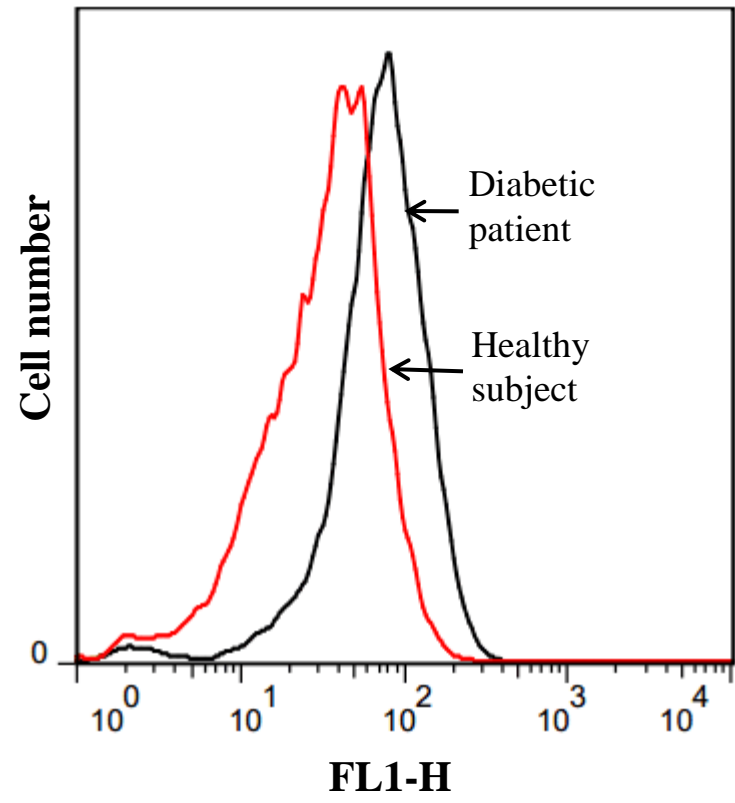

Fig. 6C

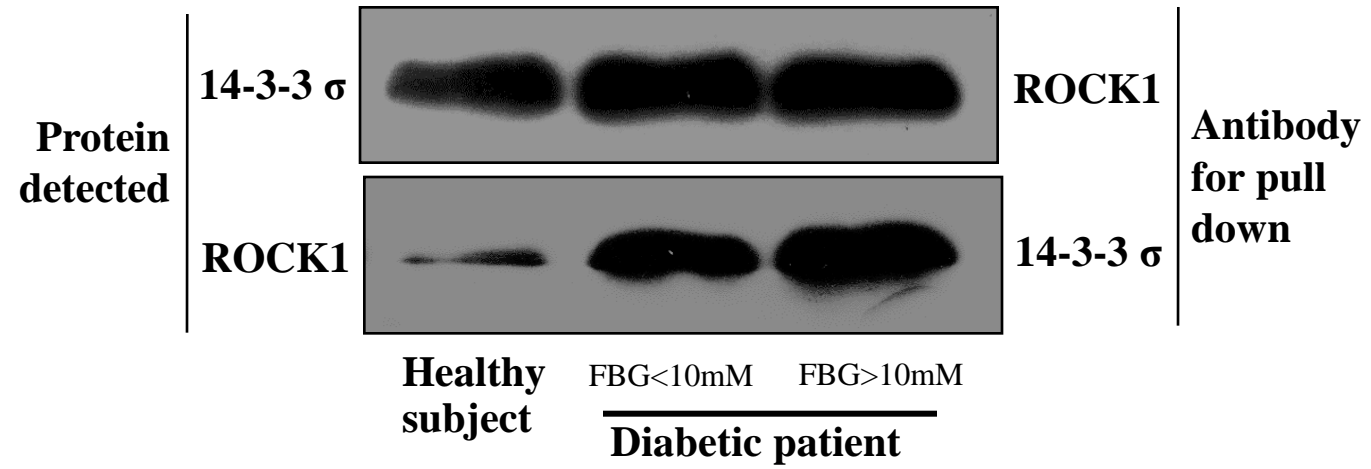

Fig. 6D

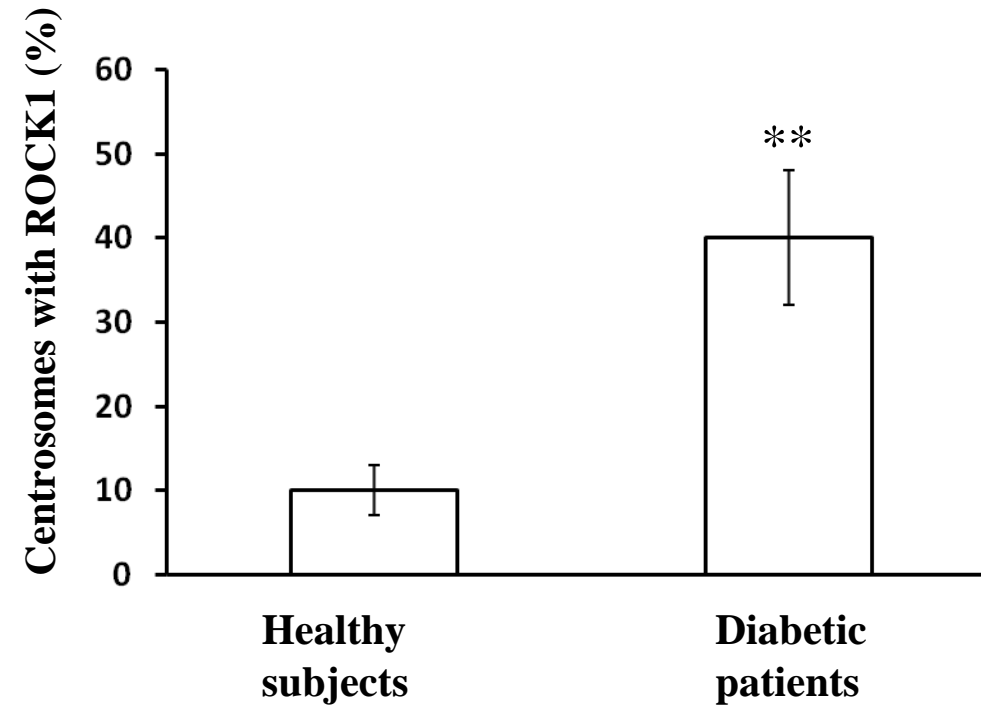

Fig. 6E

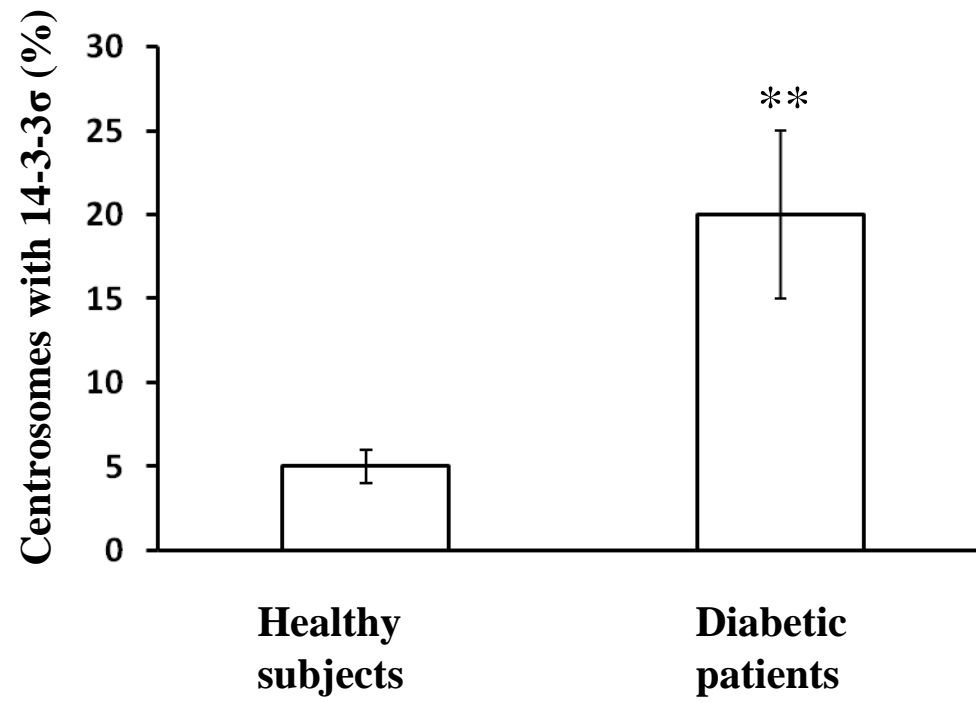

Table S1. Differentially expressed genes and KEGG pathway analysis

|                          |                                                    |                                                                             |      |
|--------------------------|----------------------------------------------------|-----------------------------------------------------------------------------|------|
| <b>Metabolism</b>        |                                                    |                                                                             |      |
| <b>Overview</b>          |                                                    |                                                                             |      |
| <b>ko01200</b>           | <b>Carbon metabolism</b>                           |                                                                             |      |
|                          | ko:K00036                                          | G6PD, zwf; glucose-6-phosphate 1-dehydrogenase                              | T up |
| <b>ko01210</b>           | <b>2-Oxocarboxylic acid metabolism</b>             |                                                                             |      |
| <b>ko01212</b>           | <b>Fatty acid metabolism</b>                       |                                                                             |      |
|                          | ko:K08765                                          | CPT1; carnitine O-palmitoyltransferase 1                                    | T up |
| <b>ko00030</b>           | <b>Pentose phosphate pathway</b>                   |                                                                             |      |
|                          | ko:K00036                                          | G6PD, zwf; glucose-6-phosphate 1-dehydrogenase                              | T up |
| <b>ko00040</b>           | <b>Pentose and glucuronate interconversions</b>    |                                                                             |      |
|                          | ko:K00011                                          | E1.1.1.21, AKR1; aldehyde reductase                                         | T up |
| <b>ko00051</b>           | <b>Fructose and mannose metabolism</b>             |                                                                             |      |
|                          | ko:K00846                                          | KHK; ketohexokinase                                                         | T up |
|                          | ko:K00011                                          | E1.1.1.21, AKR1; aldehyde reductase                                         | T up |
| <b>ko00052</b>           | <b>Galactose metabolism</b>                        |                                                                             |      |
|                          | ko:K00011                                          | E1.1.1.21, AKR1; aldehyde reductase                                         | T up |
| <b>ko00500</b>           | <b>Starch and sucrose metabolism</b>               |                                                                             |      |
|                          | ko:K01513                                          | ENPP1_3; ectonucleotide pyrophosphatase/phosphodiesterase family member 1/3 | T up |
| <b>ko00520</b>           | <b>Amino sugar and nucleotide sugar metabolism</b> |                                                                             |      |
|                          | ko:K00820                                          | E2.6.1.16, glmS; glucosamine--fructose-6-phosphate aminotransferase         | T up |
| <b>ko00620</b>           | <b>Pyruvate metabolism</b>                         |                                                                             |      |
|                          | ko:K00011                                          | E1.1.1.21, AKR1; aldehyde reductase                                         | T up |
| <b>ko00630</b>           | <b>Glyoxylate and dicarboxylate metabolism</b>     |                                                                             |      |
|                          | ko:K15788                                          | GLYCTK; glycerate kinase                                                    | C up |
| <b>Energy metabolism</b> |                                                    |                                                                             |      |
| <b>ko00190</b>           | <b>Oxidative phosphorylation</b>                   |                                                                             |      |
|                          | ko:K02148                                          | ATPeV1C, ATP6C; V-type H <sup>+</sup> -transporting ATPase subunit C        | T up |
| <b>ko00910</b>           | <b>Nitrogen metabolism</b>                         |                                                                             |      |
|                          | ko:K01672                                          | E4.2.1.1; carbonic anhydrase                                                | T up |
| <b>ko00920</b>           | <b>Sulfur metabolism</b>                           |                                                                             |      |
|                          | ko:K17218                                          | sqr; sulfide:quinone oxidoreductase                                         | T up |
| <b>Lipid metabolism</b>  |                                                    |                                                                             |      |
| <b>ko00061</b>           | <b>Fatty acid biosynthesis</b>                     |                                                                             |      |
| <b>ko00062</b>           | <b>Fatty acid elongation</b>                       |                                                                             |      |
|                          | ko:K10248                                          | ELOVL3; elongation of very long chain fatty acids protein 3                 | T up |
| <b>ko00071</b>           | <b>Fatty acid degradation</b>                      |                                                                             |      |
|                          | ko:K08765                                          | CPT1; carnitine O-palmitoyltransferase 1                                    | T up |
| <b>ko00140</b>           | <b>Steroid hormone biosynthesis</b>                |                                                                             |      |
|                          | ko:K07408                                          | CYP1A1; cytochrome P450, family 1, subfamily A, polypeptide 1               | T up |
|                          | ko:K04119                                          | AKR1C3; aldo-keto reductase family 1 member C3                              | T up |
|                          | ko:K01015                                          | SULT2B1; alcohol sulfotransferase                                           | T up |

|                                        |                                                    |                                                                                   |      |
|----------------------------------------|----------------------------------------------------|-----------------------------------------------------------------------------------|------|
| <b>ko00561</b>                         | <b>Glycerolipid metabolism</b>                     |                                                                                   |      |
|                                        | ko:K01080                                          | PPAP2; phosphatidate phosphatase                                                  | T up |
|                                        | ko:K11160                                          | DGAT2; diacylglycerol O-acyltransferase 2                                         | T up |
|                                        | ko:K00011                                          | E1.1.1.21, AKR1; aldehyde reductase                                               | T up |
|                                        | ko:K15788                                          | GLYCTK; glycerate kinase                                                          | C up |
| <b>ko00564</b>                         | <b>Glycerophospholipid metabolism</b>              |                                                                                   |      |
|                                        | ko:K01080                                          | PPAP2; phosphatidate phosphatase                                                  | T up |
|                                        | ko:K06124                                          | PHOSPHO1; phosphoethanolamine/phosphocholine phosphatase                          | T up |
|                                        | ko:K01049                                          | ACHE; acetylcholinesterase                                                        | T up |
| <b>ko00565</b>                         | <b>Ether lipid metabolism</b>                      |                                                                                   |      |
|                                        | ko:K01080                                          | PPAP2; phosphatidate phosphatase                                                  | T up |
| <b>ko00600</b>                         | <b>Sphingolipid metabolism</b>                     |                                                                                   |      |
|                                        | ko:K04718                                          | SPHK; sphingosine kinase                                                          | T up |
|                                        | ko:K12350                                          | SMPD1, ASM; sphingomyelin phosphodiesterase                                       | T up |
|                                        | ko:K01080                                          | PPAP2; phosphatidate phosphatase                                                  | T up |
| <b>ko00590</b>                         | <b>Arachidonic acid metabolism</b>                 |                                                                                   |      |
|                                        | ko:K00509                                          | PTGS1, COX1; prostaglandin-endoperoxide synthase 1                                | T up |
|                                        | ko:K04119                                          | AKR1C3; aldo-keto reductase family 1 member C3                                    | T up |
|                                        | ko:K07418                                          | CYP2J; cytochrome P450, family 2, subfamily J                                     | T up |
|                                        | ko:K01832                                          | TBXAS1, CYP5A; thromboxane-A synthase                                             | T up |
| <b>ko00591</b>                         | <b>Linoleic acid metabolism</b>                    |                                                                                   |      |
|                                        | ko:K07418                                          | CYP2J; cytochrome P450, family 2, subfamily J                                     | T up |
| <b>Nucleotide metabolism</b>           |                                                    |                                                                                   |      |
| <b>ko00230</b>                         | <b>Purine metabolism</b>                           |                                                                                   |      |
|                                        | ko:K01513                                          | ENPP1_3; ectonucleotide pyrophosphatase/phosphodiesterase family member 1/3       | T up |
|                                        | ko:K01509                                          | E3.6.1.3; adenosinetriphosphatase                                                 | T up |
|                                        | ko:K01487                                          | E3.5.4.3, guaD; guanine deaminase                                                 | C up |
|                                        | ko:K13762                                          | PDE5; cGMP-specific 3',5'-cyclic phosphodiesterase                                | T up |
|                                        | ko:K08045                                          | ADCY5; adenylate cyclase 5                                                        | T up |
| <b>ko00240</b>                         | <b>Pyrimidine metabolism</b>                       |                                                                                   |      |
| <b>Amino acid metabolism</b>           |                                                    |                                                                                   |      |
| <b>ko00250</b>                         | <b>Alanine, aspartate and glutamate metabolism</b> |                                                                                   |      |
|                                        | ko:K00820                                          | E2.6.1.16, glmS; glucosamine--fructose-6-phosphate aminotransferase (isomerizing) | T up |
| <b>ko00260</b>                         | <b>Glycine, serine and threonine metabolism</b>    |                                                                                   |      |
|                                        | ko:K15788                                          | GLYCTK; glycerate kinase                                                          | C up |
|                                        | ko:K00314                                          | SARDH; sarcosine dehydrogenase                                                    | T up |
| <b>ko00330</b>                         | <b>Arginine and proline metabolism</b>             |                                                                                   |      |
|                                        | ko:K00472                                          | E1.14.11.2; prolyl 4-hydroxylase                                                  | T up |
| <b>ko00380</b>                         | <b>Tryptophan metabolism</b>                       |                                                                                   |      |
|                                        | ko:K07408                                          | CYP1A1; cytochrome P450, family 1, subfamily A, polypeptide 1                     | T up |
| <b>Metabolism of other amino acids</b> |                                                    |                                                                                   |      |

|                                           |                                                                                |                                                                                               |      |
|-------------------------------------------|--------------------------------------------------------------------------------|-----------------------------------------------------------------------------------------------|------|
| <b>ko00480</b>                            | <b>Glutathione metabolism</b>                                                  |                                                                                               |      |
|                                           | ko:K00799                                                                      | GST, gst; glutathione S-transferase                                                           | T up |
|                                           | ko:K00036                                                                      | G6PD, zwf; glucose-6-phosphate 1-dehydrogenase                                                | T up |
| <b>Glycan biosynthesis and metabolism</b> |                                                                                |                                                                                               |      |
| <b>ko00513</b>                            | <b>Various types of N-glycan biosynthesis</b>                                  |                                                                                               |      |
|                                           | ko:K00781                                                                      | SIAT6; N-acetylglucosaminyl transferase (sialyltransferase 6)                                 | C up |
| <b>ko00512</b>                            | <b>Mucin type O-glycan biosynthesis</b>                                        |                                                                                               |      |
|                                           | ko:K00727                                                                      | GCNT1; beta-1,3-galactosyl-O-glycosyl-glycoprotein beta-1,6-N-acetylglucosaminyltransferase   | T up |
|                                           | ko:K00710                                                                      | GALNT; polypeptide N-acetylgalactosaminyltransferase                                          | T up |
|                                           | ko:K00780                                                                      | SIAT4A; beta-galactoside alpha-2,3-sialyltransferase (sialyltransferase 4A) [EC:2.4.99.4]     | T up |
| <b>ko00514</b>                            | <b>Other types of O-glycan biosynthesis</b>                                    |                                                                                               |      |
|                                           | ko:K05948                                                                      | FNG; fringe [EC:2.4.1.222]                                                                    | T up |
|                                           | ko:K00781                                                                      | SIAT6; N-acetylglucosaminyl transferase (sialyltransferase 6) [EC:2.4.99.6]                   | C up |
| <b>ko00532</b>                            | <b>Glycosaminoglycan biosynthesis - chondroitin sulfate / dermatan sulfate</b> |                                                                                               |      |
|                                           | ko:K00771                                                                      | XYLT; protein xylosyltransferase [EC:2.4.2.26]                                                | T up |
| <b>ko00534</b>                            | <b>Glycosaminoglycan biosynthesis - heparan sulfate / heparin</b>              |                                                                                               |      |
|                                           | ko:K00771                                                                      | XYLT; protein xylosyltransferase [EC:2.4.2.26]                                                | T up |
| <b>ko00533</b>                            | <b>Glycosaminoglycan biosynthesis - keratan sulfate</b>                        |                                                                                               |      |
|                                           | ko:K00780                                                                      | SIAT4A; beta-galactoside alpha-2,3-sialyltransferase (sialyltransferase 4A) [EC:2.4.99.4]     | T up |
|                                           | ko:K00741                                                                      | B3GNT1, B3GNT2; N-acetylglucosaminyltransferase [EC:2.4.1.149]                                | T up |
|                                           | ko:K09664                                                                      | B3GNT7; beta-1,3-N-acetylglucosaminyltransferase 7 [EC:2.4.1.-]                               | T up |
|                                           | ko:K04745                                                                      | CHST2; carbohydrate 6-sulfotransferase 2 [EC:2.8.2.-]                                         | T up |
|                                           | ko:K00781                                                                      | SIAT6; N-acetylglucosaminyl transferase (sialyltransferase 6) [EC:2.4.99.6]                   | C up |
| <b>ko00601</b>                            | <b>Glycosphingolipid biosynthesis - lacto and neolacto series</b>              |                                                                                               |      |
|                                           | ko:K00741                                                                      | B3GNT1, B3GNT2; N-acetylglucosaminyltransferase [EC:2.4.1.149]                                | T up |
|                                           | ko:K00781                                                                      | SIAT6; N-acetylglucosaminyl transferase (sialyltransferase 6) [EC:2.4.99.6]                   | C up |
| <b>ko00603</b>                            | <b>Glycosphingolipid biosynthesis - globo series</b>                           |                                                                                               |      |
|                                           | ko:K00780                                                                      | SIAT4A; beta-galactoside alpha-2,3-sialyltransferase (sialyltransferase 4A) [EC:2.4.99.4]     | T up |
|                                           | ko:K01988                                                                      | A4GALT; lactosylceramide 4-alpha-galactosyltransferase [EC:2.4.1.228]                         | T up |
| <b>ko00604</b>                            | <b>Glycosphingolipid biosynthesis - ganglio series</b>                         |                                                                                               |      |
|                                           | ko:K03373                                                                      | SIAT7C, ST6GalNAc III; N-acetylgalactosaminyltransferase (sialyltransferase 7C) [EC:2.4.99.-] | T up |

|                                                 |                                                     |                                                                                                                  |      |
|-------------------------------------------------|-----------------------------------------------------|------------------------------------------------------------------------------------------------------------------|------|
|                                                 | ko:K00780                                           | SIAT4A; beta-galactoside alpha-2,3-sialyltransferase (sialyltransferase 4A) [EC:2.4.99.4]                        | T up |
|                                                 | ko:K00725                                           | B4GALNT1, GALGT; (N-Acetylneuraminyl)-galactosylglucosylceramide N-acetylgalactosaminyltransferase [EC:2.4.1.92] | T up |
| <b>Metabolism of cofactors and vitamins</b>     |                                                     |                                                                                                                  |      |
| <b>ko00730</b>                                  | <b>Thiamine metabolism</b>                          |                                                                                                                  |      |
| <b>ko00740</b>                                  | <b>Riboflavin metabolism</b>                        |                                                                                                                  |      |
|                                                 | ko:K01513                                           | ENPP1_3; ectonucleotide pyrophosphatase/phosphodiesterase family member 1/3 [EC:3.1.4.1 3.6.1.9]                 | T up |
| <b>ko00750</b>                                  | <b>Vitamin B6 metabolism</b>                        |                                                                                                                  |      |
| <b>ko00760</b>                                  | <b>Nicotinate and nicotinamide metabolism</b>       |                                                                                                                  |      |
|                                                 | ko:K01513                                           | ENPP1_3; ectonucleotide pyrophosphatase/phosphodiesterase family member 1/3 [EC:3.1.4.1 3.6.1.9]                 | T up |
| <b>ko00770</b>                                  | <b>Pantothenate and CoA biosynthesis</b>            |                                                                                                                  |      |
|                                                 | ko:K01513                                           | ENPP1_3; ectonucleotide pyrophosphatase/phosphodiesterase family member 1/3 [EC:3.1.4.1 3.6.1.9]                 | T up |
| <b>ko00830</b>                                  | <b>Retinol metabolism</b>                           |                                                                                                                  |      |
|                                                 | ko:K12664                                           | CYP26B; cytochrome P450, family 26, subfamily B                                                                  | T up |
|                                                 | ko:K07408                                           | CYP1A1; cytochrome P450, family 1, subfamily A, polypeptide 1 [EC:1.14.14.1]                                     | T up |
| <b>Metabolism of terpenoids and polyketides</b> |                                                     |                                                                                                                  |      |
| <b>ko00980</b>                                  | <b>Metabolism of xenobiotics by cytochrome P450</b> |                                                                                                                  |      |
|                                                 | ko:K07408                                           | CYP1A1; cytochrome P450, family 1, subfamily A, polypeptide 1 [EC:1.14.14.1]                                     | T up |
|                                                 | ko:K00799                                           | GST, gst; glutathione S-transferase [EC:2.5.1.18]                                                                | T up |
| <b>ko00982</b>                                  | <b>Drug metabolism - cytochrome P450</b>            |                                                                                                                  |      |
|                                                 | ko:K00799                                           | GST, gst; glutathione S-transferase [EC:2.5.1.18]                                                                | T up |
| <b>Enzyme families</b>                          |                                                     |                                                                                                                  |      |
| <b>Genetic Information Processing</b>           |                                                     |                                                                                                                  |      |
| <b>Transcription</b>                            |                                                     |                                                                                                                  |      |
| <b>ko03040</b>                                  | <b>Spliceosome</b>                                  |                                                                                                                  |      |
|                                                 | ko:K03283                                           | HSPA1_8; heat shock 70kDa protein 1/8                                                                            | T up |
| <b>ko03041</b>                                  | <b>Spliceosome</b>                                  |                                                                                                                  |      |
| <b>Translation</b>                              |                                                     |                                                                                                                  |      |
| <b>ko03010</b>                                  | <b>Ribosome</b>                                     |                                                                                                                  |      |
|                                                 | ko:K02929                                           | RP-L44e, RPL44; large subunit ribosomal protein L44e                                                             | C up |
| <b>ko03011</b>                                  | <b>Ribosome</b>                                     |                                                                                                                  |      |
| <b>ko03016</b>                                  | <b>Transfer RNA biogenesis</b>                      |                                                                                                                  |      |
| <b>ko00970</b>                                  | <b>Aminoacyl-tRNA biosynthesis</b>                  |                                                                                                                  |      |
|                                                 | ko:K01867                                           | WARS, trpS; tryptophanyl-tRNA synthetase [EC:6.1.1.2]                                                            | C up |
| <b>ko03013</b>                                  | <b>RNA transport</b>                                |                                                                                                                  |      |



|                                             |                                                    |                                                                                                              |      |
|---------------------------------------------|----------------------------------------------------|--------------------------------------------------------------------------------------------------------------|------|
|                                             | ko:K03257                                          | EIF4A; translation initiation factor 4A                                                                      | C up |
|                                             | ko:K03250                                          | EIF3E, INT6; translation initiation factor 3 subunit E                                                       | C up |
|                                             | ko:K00784                                          | rnz; ribonuclease Z [EC:3.1.26.11]                                                                           | C up |
|                                             | ko:K03245                                          | EIF3J; translation initiation factor 3 subunit J                                                             | C up |
| <b>Folding, sorting and degradation</b>     |                                                    |                                                                                                              |      |
| <b>ko03060</b>                              | <b>Protein export</b>                              |                                                                                                              |      |
|                                             | ko:K09490                                          | HSPA5, BIP; heat shock 70kDa protein 5                                                                       | C up |
| <b>ko04141</b>                              | <b>Protein processing in endoplasmic reticulum</b> |                                                                                                              |      |
|                                             | ko:K09487                                          | HSP90B, TRA1; heat shock protein 90kDa beta                                                                  | C up |
|                                             | ko:K04452                                          | DDIT3, GADD153; DNA damage-inducible transcript 3                                                            | C up |
|                                             | ko:K14019                                          | PPP1R15A, GADD34; protein phosphatase 1 regulatory subunit 15A                                               | C up |
|                                             | ko:K09490                                          | HSPA5, BIP; heat shock 70kDa protein 5                                                                       | C up |
|                                             | ko:K11863                                          | ATXN3, MJD; Ataxin-3 [EC:3.4.22.-]                                                                           | C up |
|                                             | ko:K14027                                          | HERPUD1, HERP; homocysteine-responsive endoplasmic reticulum-resident ubiquitin-like domain member 1 protein | C up |
|                                             | ko:K03283                                          | HSPA1_8; heat shock 70kDa protein 1/8                                                                        | T up |
| <b>ko04120</b>                              | <b>Ubiquitin mediated proteolysis</b>              |                                                                                                              |      |
|                                             | ko:K10605                                          | BRCA1; breast cancer type 1 susceptibility protein                                                           | C up |
| <b>ko03440</b>                              | <b>Homologous recombination</b>                    |                                                                                                              |      |
|                                             | ko:K10865                                          | MRE11; double-strand break repair protein MRE11                                                              | C up |
|                                             | ko:K08775                                          | BRCA2, FANCD1; breast cancer 2 susceptibility protein                                                        | C up |
| <b>ko03450</b>                              | <b>Non-homologous end-joining</b>                  |                                                                                                              |      |
|                                             | ko:K10865                                          | MRE11; double-strand break repair protein MRE11                                                              | C up |
|                                             | ko:K10886                                          | XRCC4; DNA-repair protein XRCC4                                                                              | C up |
| <b>ko03460</b>                              | <b>Fanconi anemia pathway</b>                      |                                                                                                              |      |
|                                             | ko:K10605                                          | BRCA1; breast cancer type 1 susceptibility protein                                                           | C up |
|                                             | ko:K08775                                          | BRCA2, FANCD1; breast cancer 2 susceptibility protein                                                        | C up |
|                                             |                                                    |                                                                                                              |      |
| <b>Environmental Information Processing</b> |                                                    |                                                                                                              |      |
| <b>Membrane transport</b>                   |                                                    |                                                                                                              |      |
| <b>ko02000</b>                              | <b>Transporters</b>                                |                                                                                                              |      |
| <b>ko02010</b>                              | <b>ABC transporters</b>                            |                                                                                                              |      |
|                                             | ko:K05675                                          | ABCD1, ALD; ATP-binding cassette, subfamily D (ALD), member 1                                                | T up |
|                                             | ko:K05679                                          | ABCG1; ATP-binding cassette, subfamily G (WHITE), member 1                                                   | T up |
|                                             | ko:K05680                                          | ABCG4; ATP-binding cassette, subfamily G (WHITE), member 4                                                   | T up |
| <b>Signal transduction</b>                  |                                                    |                                                                                                              |      |
| <b>ko04014</b>                              | <b>Ras signaling pathway</b>                       |                                                                                                              |      |
|                                             | ko:K04543                                          | GNG7; guanine nucleotide-binding protein G(I)/G(S)/G(O) subunit gamma-7                                      | T up |
|                                             | ko:K12361                                          | RASGRP2; RAS guanyl-releasing protein 2                                                                      | T up |
|                                             | ko:K02649                                          | PIK3R; phosphoinositide-3-kinase, regulatory subunit                                                         | T up |
|                                             | ko:K02649                                          | PIK3R; phosphoinositide-3-kinase, regulatory subunit                                                         | T up |
|                                             | ko:K05466                                          | ANGPT2; angiopoietin 2                                                                                       | C up |

|                |                                |                                                                              |      |
|----------------|--------------------------------|------------------------------------------------------------------------------|------|
|                | ko:K17635                      | RGL1, RGL; ral guanine nucleotide dissociation stimulator-like 1             | T up |
|                | ko:K04349                      | RASGRF1; Ras-specific guanine nucleotide-releasing factor 1                  | C up |
|                | ko:K16859                      | PGF; placenta growth factor                                                  | T up |
|                | ko:K05453                      | CSF1, MCSF; macrophage colony-stimulating factor 1                           | T up |
|                | ko:K05462                      | EFNA; ephrin-A                                                               | T up |
|                | ko:K05462                      | EFNA; ephrin-A                                                               | T up |
|                | ko:K02583                      | NGFR; nerve growth factor receptor (TNFR superfamily member 16)              | T up |
| <b>ko04015</b> | <b>Rap1 signaling pathway</b>  |                                                                              |      |
|                | ko:K05453                      | CSF1, MCSF; macrophage colony-stimulating factor 1                           | T up |
|                | ko:K05462                      | EFNA; ephrin-A                                                               | T up |
|                | ko:K05462                      | EFNA; ephrin-A                                                               | T up |
|                | ko:K02583                      | NGFR; nerve growth factor receptor (TNFR superfamily member 16)              | T up |
|                | ko:K08045                      | ADCY5; adenylate cyclase 5 [EC:4.6.1.1]                                      | T up |
|                | ko:K12361                      | RASGRP2; RAS guanyl-releasing protein 2                                      | T up |
|                | ko:K02649                      | PIK3R; phosphoinositide-3-kinase, regulatory subunit                         | T up |
|                | ko:K02649                      | PIK3R; phosphoinositide-3-kinase, regulatory subunit                         | T up |
|                | ko:K05466                      | ANGPT2; angiopoietin 2                                                       | C up |
|                | ko:K04266                      | ADORA2A, ADOR; adenosine receptor A2a                                        | T up |
|                | ko:K16859                      | PGF; placenta growth factor                                                  | T up |
| <b>ko04010</b> | <b>MAPK signaling pathway</b>  |                                                                              |      |
|                | ko:K04434                      | MAPK8IP1, JIP1; mitogen-activated protein kinase 8 interacting protein 1     | T up |
|                | ko:K04859                      | CACNA2D2; voltage-dependent calcium channel alpha-2/delta-2                  | T up |
|                | ko:K04415                      | MAP3K8, COT; mitogen-activated protein kinase kinase kinase 8 [EC:2.7.11.25] | T up |
|                | ko:K04349                      | RASGRF1; Ras-specific guanine nucleotide-releasing factor 1                  | C up |
|                | ko:K12361                      | RASGRP2; RAS guanyl-releasing protein 2                                      | T up |
|                | ko:K03283                      | HSPA1_8; heat shock 70kDa protein 1/8                                        | T up |
|                | ko:K04445                      | MSK1, RPS6KA5; ribosomal protein S6 kinase alpha-5 [EC:2.7.11.1]             | C up |
|                | ko:K04452                      | DDIT3, GADD153; DNA damage-inducible transcript 3                            | C up |
|                | ko:K04854                      | CACNA1G; voltage-dependent calcium channel T type alpha-1G                   | T up |
| <b>ko04012</b> | <b>ErbB signaling pathway</b>  |                                                                              |      |
|                | ko:K02649                      | PIK3R; phosphoinositide-3-kinase, regulatory subunit                         | T up |
|                | ko:K02649                      | PIK3R; phosphoinositide-3-kinase, regulatory subunit                         | T up |
| <b>ko04310</b> | <b>Wnt signaling pathway</b>   |                                                                              |      |
|                | ko:K00445                      | WNT6; wingless-type MMTV integration site family, member 6                   | T up |
|                | ko:K01384                      | WNT11; wingless-type MMTV integration site family, member 11                 | T up |
|                | ko:K00572                      | WNT7; wingless-type MMTV integration site family, member 7                   | T up |
|                | ko:K03213                      | NKD; naked cuticle                                                           | T up |
|                | ko:K02354                      | FZD4, fz4; frizzled 4                                                        | T up |
|                | ko:K10162                      | BAMBI; BMP and activin membrane-bound inhibitor                              | T up |
| <b>ko04330</b> | <b>Notch signaling pathway</b> |                                                                              |      |
|                | ko:K06058                      | DTX; deltex                                                                  | T up |

|                |                                     |                                                                       |      |
|----------------|-------------------------------------|-----------------------------------------------------------------------|------|
|                | ko:K05948                           | FNG; fringe [EC:2.4.1.222]                                            | T up |
|                | ko:K06051                           | DLL; delta                                                            | T up |
|                | ko:K02599                           | NOTCH; Notch                                                          | T up |
| <b>ko04340</b> | <b>Hedgehog signaling pathway</b>   |                                                                       |      |
|                | ko:K00445                           | WNT6; wingless-type MMTV integration site family, member 6            | T up |
|                | ko:K16798                           | GLI2; zinc finger protein GLI2                                        | T up |
|                | ko:K01384                           | WNT11; wingless-type MMTV integration site family, member 11          | T up |
|                | ko:K00572                           | WNT7; wingless-type MMTV integration site family, member 7            | T up |
| <b>ko04350</b> | <b>TGF-beta signaling pathway</b>   |                                                                       |      |
|                | ko:K04657                           | CHRD; chordin                                                         | T up |
|                | ko:K04514                           | Rock1; Rho-associated protein kinase 1 [EC:2.7.11.1]                  | T up |
|                | ko:K04677                           | SMAD6_7; mothers against decapentaplegic homolog 6/7                  | T up |
|                | ko:K10162                           | BAMBI; BMP and activin membrane-bound inhibitor                       | T up |
| <b>ko04390</b> | <b>Hippo signaling pathway</b>      |                                                                       |      |
|                | ko:K16798                           | GLI2; zinc finger protein GLI2                                        | T up |
|                | ko:K02354                           | FZD4, fz4; frizzled 4                                                 | T up |
|                | ko:K16819                           | AMOT; angiominin                                                      | T up |
|                | ko:K00445                           | WNT6; wingless-type MMTV integration site family, member 6            | T up |
|                | ko:K01384                           | WNT11; wingless-type MMTV integration site family, member 11          | T up |
|                | ko:K00572                           | WNT7; wingless-type MMTV integration site family, member 7            | T up |
| <b>ko04391</b> | <b>Hippo signaling pathway -fly</b> |                                                                       |      |
|                | ko:K09851                           | RASSF2_4; Ras association domain-containing protein 2/4               | T up |
|                | ko:K16669                           | FAT4; protocadherin Fat 4                                             | T up |
| <b>ko04370</b> | <b>VEGF signaling pathway</b>       |                                                                       |      |
|                | ko:K02649                           | PIK3R; phosphoinositide-3-kinase, regulatory subunit                  | T up |
|                | ko:K02649                           | PIK3R; phosphoinositide-3-kinase, regulatory subunit                  | T up |
|                | ko:K04718                           | SPHK; sphingosine kinase [EC:2.7.1.91]                                | T up |
|                | ko:K08273                           | SH2D2A, VRAP; SH2 domain protein 2A                                   | C up |
| <b>ko04630</b> | <b>Jak-STAT signaling pathway</b>   |                                                                       |      |
|                | ko:K05134                           | IL10RA; interleukin 10 receptor alpha                                 | T up |
|                | ko:K02649                           | PIK3R; phosphoinositide-3-kinase, regulatory subunit                  | T up |
|                | ko:K02649                           | PIK3R; phosphoinositide-3-kinase, regulatory subunit                  | T up |
|                | ko:K11222                           | STAT4; signal transducer and activator of transcription 4             | T up |
|                | ko:K05138                           | IL22RA1; interleukin 22 receptor alpha 1                              | T up |
|                | ko:K05433                           | IL15; interleukin 15                                                  | T up |
| <b>ko04064</b> | <b>NF-kappa B signaling pathway</b> |                                                                       |      |
|                | ko:K18052                           | PRKCQ; novel protein kinase C theta type [EC:2.7.11.13]               | T up |
|                | ko:K10030                           | IL8, CXCL8; interleukin 8                                             | T up |
| <b>ko04668</b> | <b>TNF signaling pathway</b>        |                                                                       |      |
|                | ko:K02649                           | PIK3R; phosphoinositide-3-kinase, regulatory subunit                  | T up |
|                | ko:K02649                           | PIK3R; phosphoinositide-3-kinase, regulatory subunit                  | T up |
|                | ko:K05141                           | TNFRSF1B, TNFR2; tumor necrosis factor receptor superfamily member 1B | T up |

|                |                                              |                                                                              |      |
|----------------|----------------------------------------------|------------------------------------------------------------------------------|------|
|                | ko:K05453                                    | CSF1, MCSF; macrophage colony-stimulating factor 1                           | T up |
|                | ko:K04415                                    | MAP3K8, COT; mitogen-activated protein kinase kinase kinase 8 [EC:2.7.11.25] | T up |
|                | ko:K04445                                    | MSK1, RPS6KA5; ribosomal protein S6 kinase alpha-5 [EC:2.7.11.1]             | C up |
|                | ko:K09048                                    | CREB3; cyclic AMP-responsive element-binding protein 3                       | T up |
|                | ko:K09048                                    | CREB3; cyclic AMP-responsive element-binding protein 3                       | T up |
|                | ko:K05433                                    | IL15; interleukin 15                                                         | T up |
| <b>ko04066</b> | <b>HIF-1 signaling pathway</b>               |                                                                              |      |
|                | ko:K02649                                    | PIK3R; phosphoinositide-3-kinase, regulatory subunit                         | T up |
|                | ko:K02649                                    | PIK3R; phosphoinositide-3-kinase, regulatory subunit                         | T up |
|                | ko:K16451                                    | TIMP1; metalloproteinase inhibitor 1                                         | T up |
|                | ko:K05466                                    | ANGPT2; angiopoietin 2                                                       | C up |
| <b>ko04068</b> | <b>FoxO signaling pathway</b>                |                                                                              |      |
|                | ko:K08861                                    | PLK2; polo-like kinase 2 [EC:2.7.11.21]                                      | C up |
|                | ko:K08863                                    | PLK4; polo-like kinase 4 [EC:2.7.11.21]                                      | C up |
|                | ko:K13302                                    | SGK1; serum/glucocorticoid-regulated kinase 1 [EC:2.7.11.1]                  | T up |
|                | ko:K17845                                    | KLF2; krueppel-like factor 2                                                 | C up |
|                | ko:K02649                                    | PIK3R; phosphoinositide-3-kinase, regulatory subunit                         | T up |
|                | ko:K02649                                    | PIK3R; phosphoinositide-3-kinase, regulatory subunit                         | T up |
|                | ko:K06623                                    | CDKN2D, P19, INK4D; cyclin-dependent kinase inhibitor 2D                     | T up |
|                | ko:K08336                                    | ATG12; ubiquitin-like protein ATG12                                          | C up |
| <b>ko04020</b> | <b>Calcium signaling pathway</b>             |                                                                              |      |
|                | ko:K04633                                    | GNAL; guanine nucleotide-binding protein G(olf) subunit alpha                | T up |
|                | ko:K04854                                    | CACNA1G; voltage-dependent calcium channel T type alpha-1G                   | T up |
|                | ko:K00907                                    | MYLK; myosin-light-chain kinase [EC:2.7.11.18]                               | T up |
|                | ko:K04718                                    | SPHK; sphingosine kinase [EC:2.7.1.91]                                       | T up |
|                | ko:K04266                                    | ADORA2A, ADOR; adenosine receptor A2a                                        | T up |
| <b>ko04070</b> | <b>Phosphatidylinositol signaling system</b> |                                                                              |      |
|                | ko:K02649                                    | PIK3R; phosphoinositide-3-kinase, regulatory subunit                         | T up |
|                | ko:K02649                                    | PIK3R; phosphoinositide-3-kinase, regulatory subunit                         | T up |
| <b>ko04151</b> | <b>PI3K-Akt signaling pathway</b>            |                                                                              |      |
|                | ko:K06236                                    | COL1A5; collagen, type I/II/III/V/XI/XXIV/XXVII, alpha                       | T up |
|                | ko:K16859                                    | PGF; placenta growth factor                                                  | T up |
|                | ko:K06484                                    | ITGA5; integrin alpha 5                                                      | T up |
|                | ko:K05466                                    | ANGPT2; angiopoietin 2                                                       | C up |
|                | ko:K10605                                    | BRCA1; breast cancer type 1 susceptibility protein                           | C up |
|                | ko:K13302                                    | SGK1; serum/glucocorticoid-regulated kinase 1 [EC:2.7.11.1]                  | T up |
|                | ko:K02649                                    | PIK3R; phosphoinositide-3-kinase, regulatory subunit                         | T up |
|                | ko:K02649                                    | PIK3R; phosphoinositide-3-kinase, regulatory subunit                         | T up |
|                | ko:K04543                                    | GNG7; guanine nucleotide-binding protein G(I)/G(S)/G(O) subunit gamma-7      | T up |
|                | ko:K06240                                    | LAMA3_5; laminin, alpha 3/5                                                  | T up |
|                | ko:K09487                                    | HSP90B, TRA1; heat shock protein 90kDa beta                                  | C up |

|                |                                                |                                                                          |      |
|----------------|------------------------------------------------|--------------------------------------------------------------------------|------|
|                | ko:K06250                                      | SPP1, BNSP, OPN; secreted phosphoprotein 1                               | T up |
|                | ko:K02583                                      | NGFR; nerve growth factor receptor (TNFR superfamily member 16)          | T up |
|                | ko:K06237                                      | COL4A; collagen, type IV, alpha                                          | T up |
|                | ko:K09048                                      | CREB3; cyclic AMP-responsive element-binding protein 3                   | T up |
|                | ko:K09048                                      | CREB3; cyclic AMP-responsive element-binding protein 3                   | T up |
|                | ko:K05462                                      | EFNA; ephrin-A                                                           | T up |
|                | ko:K05462                                      | EFNA; ephrin-A                                                           | T up |
|                | ko:K05717                                      | FN1; fibronectin 1                                                       | T up |
|                | ko:K05453                                      | CSF1, MCSF; macrophage colony-stimulating factor 1                       | T up |
|                | ko:K06591                                      | ITGB8; integrin beta 8                                                   | C up |
| <b>ko04150</b> | <b>mTOR signaling pathway</b>                  |                                                                          |      |
|                | ko:K02649                                      | PIK3R; phosphoinositide-3-kinase, regulatory subunit                     | T up |
|                | ko:K02649                                      | PIK3R; phosphoinositide-3-kinase, regulatory subunit                     | T up |
| <b>ko04080</b> | <b>Neuroactive ligand-receptor interaction</b> |                                                                          |      |
|                | ko:K04153                                      | HTR1; 5-hydroxytryptamine receptor 1                                     | T up |
|                | ko:K04132                                      | CHRM4; muscarinic acetylcholine receptor M4                              | T up |
|                | ko:K04139                                      | ADRA2B; adrenergic receptor alpha-2B                                     | T up |
|                | ko:K04309                                      | LGR4, GPR48; leucine-rich repeat-containing G protein-coupled receptor 4 | T up |
|                | ko:K04266                                      | ADORA2A, ADOR; adenosine receptor A2a                                    | T up |
|                | ko:K04295                                      | S1PR5, EDG8; sphingosine 1-phosphate receptor 5                          | T up |
|                | ko:K05205                                      | GRIK5; glutamate receptor, ionotropic kainate 5                          | T up |
|                | ko:K05206                                      | GRID1; glutamate receptor delta-1 subunit                                | T up |
|                | ko:K04607                                      | GRM4; metabotropic glutamate receptor 4                                  | T up |
|                | ko:K05184                                      | GABRD; gamma-aminobutyric acid receptor subunit delta                    | T up |
|                | ko:K08362                                      | NR1A2, THRB; thyroid hormone receptor beta                               | T up |
|                | ko:K04265                                      | ADORA1; adenosine A1 receptor                                            | T up |
| <b>ko04060</b> | <b>Cytokine-cytokine receptor interaction</b>  |                                                                          |      |
|                | ko:K10030                                      | IL8, CXCL8; interleukin 8                                                | T up |
|                | ko:K05433                                      | IL15; interleukin 15                                                     | T up |
|                | ko:K05155                                      | TNFRSF19, TROY; tumor necrosis factor receptor superfamily member 19     | T up |
|                | ko:K05141                                      | TNFRSF1B, TNFR2; tumor necrosis factor receptor superfamily member 1B    | T up |
|                | ko:K05453                                      | CSF1, MCSF; macrophage colony-stimulating factor 1                       | T up |
|                | ko:K04175                                      | IL8RA, CXCR1; interleukin 8 receptor alpha                               | T up |
|                | ko:K04189                                      | CXCR4; C-X-C chemokine receptor type 4                                   | T up |
|                | ko:K05134                                      | IL10RA; interleukin 10 receptor alpha                                    | T up |
|                | ko:K05138                                      | IL22RA1; interleukin 22 receptor alpha 1                                 | T up |
|                | ko:K02583                                      | NGFR; nerve growth factor receptor (TNFR superfamily member 16)          | T up |
|                | ko:K05146                                      | TNFRSF9, CD137; tumor necrosis factor receptor superfamily member 9      | T up |
|                | ko:K05480                                      | EDA; ectodysplasin-A                                                     | T up |

|                                 |                                       |                                                                      |      |
|---------------------------------|---------------------------------------|----------------------------------------------------------------------|------|
| <b>ko04052</b>                  | <b>Cytokines</b>                      |                                                                      |      |
| <b>ko04512</b>                  | <b>ECM-receptor interaction</b>       |                                                                      |      |
|                                 | ko:K06250                             | SPP1, BNSP, OPN; secreted phosphoprotein 1                           | T up |
|                                 | ko:K06236                             | COL1A5; collagen, type I/II/III/V/XI/XXIV/XXVII, alpha               | T up |
|                                 | ko:K06591                             | ITGB8; integrin beta 8                                               | C up |
|                                 | ko:K05717                             | FN1; fibronectin 1                                                   | T up |
|                                 | ko:K06267                             | HMMR, RHAMM; hyaluronan-mediated motility receptor                   | C up |
|                                 | ko:K06237                             | COL4A; collagen, type IV, alpha                                      | T up |
|                                 | ko:K06484                             | ITGA5; integrin alpha 5                                              | T up |
|                                 | ko:K06240                             | LAMA3_5; laminin, alpha 3/5                                          | T up |
| <b>ko04514</b>                  | <b>Cell adhesion molecules (CAMs)</b> |                                                                      |      |
|                                 | ko:K06591                             | ITGB8; integrin beta 8                                               | C up |
|                                 | ko:K06759                             | CNTN1; contactin 1                                                   | T up |
|                                 | ko:K16360                             | LRRC4B, NGL3; netrin-G3 ligand                                       | T up |
|                                 | ko:K06550                             | L1CAM; L1 cell adhesion molecule                                     | T up |
|                                 | ko:K16359                             | NTNG2; netrin-G2                                                     | T up |
| <b>Cellular Processes</b>       |                                       |                                                                      |      |
| <b>Transport and catabolism</b> |                                       |                                                                      |      |
| <b>ko04144</b>                  | <b>Endocytosis</b>                    |                                                                      |      |
|                                 | ko:K13649                             | FOLR; folate receptor                                                | T up |
|                                 | ko:K04677                             | SMAD6_7; mothers against decapentaplegic homolog 6/7                 | T up |
|                                 | ko:K03283                             | HSPA1_8; heat shock 70kDa protein 1/8                                | T up |
|                                 | ko:K05126                             | RET; proto-oncogene tyrosine-protein kinase Ret [EC:2.7.10.1]        | T up |
|                                 | ko:K04175                             | IL8RA, CXCR1; interleukin 8 receptor alpha                           | T up |
|                                 | ko:K12958                             | CAV2; caveolin 2                                                     | C up |
|                                 | ko:K06278                             | CAV1; caveolin 1                                                     | C up |
|                                 | ko:K04189                             | CXCR4; C-X-C chemokine receptor type 4                               | T up |
| <b>ko04147</b>                  | <b>Exosome</b>                        |                                                                      |      |
| <b>ko04145</b>                  | <b>Phagosome</b>                      |                                                                      |      |
|                                 | ko:K02148                             | ATPeV1C, ATP6C; V-type H <sup>+</sup> -transporting ATPase subunit C | T up |
|                                 | ko:K03990                             | C3; complement component 3                                           | T up |
|                                 | ko:K07375                             | TUBB; tubulin beta                                                   | T up |
|                                 | ko:K07375                             | TUBB; tubulin beta                                                   | T up |
|                                 | ko:K06484                             | ITGA5; integrin alpha 5                                              | T up |
|                                 | ko:K06560                             | MRC; mannose receptor, C type                                        | T up |
|                                 | ko:K07898                             | RAB7B; Ras-related protein Rab-7B                                    | T up |
| <b>ko04142</b>                  | <b>Lysosome</b>                       |                                                                      |      |
|                                 | ko:K12350                             | SMPD1, ASM; sphingomyelin phosphodiesterase [EC:3.1.4.12]            | T up |
|                                 | ko:K12383                             | GM2A; ganglioside GM2 activator                                      | T up |
|                                 | ko:K12397                             | AP3B; AP-3 complex subunit beta                                      | T up |
|                                 | ko:K12394                             | AP1S1_2; AP-1 complex subunit sigma 1/2                              | C up |
| <b>ko04146</b>                  | <b>Peroxisome</b>                     |                                                                      |      |
|                                 | ko:K05675                             | ABCD1, ALD; ATP-binding cassette, subfamily D (ALD), member 1        | T up |

|                              |                                         |                                                                                          |      |
|------------------------------|-----------------------------------------|------------------------------------------------------------------------------------------|------|
|                              | ko:K13339                               | PEX6, PXAAA1; peroxin-6                                                                  | T up |
| <b>ko04140</b>               | <b>Regulation of autophagy</b>          |                                                                                          |      |
|                              | ko:K08336                               | ATG12; ubiquitin-like protein ATG12                                                      | C up |
| <b>Cell motility</b>         |                                         |                                                                                          |      |
| <b>ko04810</b>               | <b>Regulation of actin cytoskeleton</b> |                                                                                          |      |
|                              | ko:K00907                               | MYLK; myosin-light-chain kinase [EC:2.7.11.18]                                           | T up |
|                              | ko:K04132                               | CHRM4; muscarinic acetylcholine receptor M4                                              | T up |
|                              | ko:K10351                               | MYL2; myosin regulatory light chain 2                                                    | C up |
|                              | ko:K06591                               | ITGB8; integrin beta 8                                                                   | C up |
|                              | ko:K05717                               | FN1; fibronectin 1                                                                       | T up |
|                              | ko:K06484                               | ITGA5; integrin alpha 5                                                                  | T up |
|                              | ko:K02649                               | PIK3R; phosphoinositide-3-kinase, regulatory subunit                                     | T up |
|                              | ko:K02649                               | PIK3R; phosphoinositide-3-kinase, regulatory subunit                                     | T up |
|                              | ko:K04514                               | Rock1; Rho-associated protein kinase 1 [EC:2.7.11.1]                                     | T up |
| <b>Cell growth and death</b> |                                         |                                                                                          |      |
| <b>ko04110</b>               | <b>Cell cycle</b>                       |                                                                                          |      |
|                              | ko:K06671                               | STAG1_2, SCC3, IRR1; cohesin complex subunit SA-1/2                                      | C up |
|                              | ko:K06623                               | CDKN2D, P19, INK4D; cyclin-dependent kinase inhibitor 2D                                 | T up |
|                              | ko:K06622                               | CDKN2C, P18, INK4C; cyclin-dependent kinase inhibitor 2C                                 | T up |
|                              | ko:K06669                               | SMC3, CSPG6; structural maintenance of chromosome 3 (chondroitin sulfate proteoglycan 6) | C up |
|                              | ko:K06644                               | SFN; stratifin                                                                           | T up |
| <b>ko04114</b>               | <b>Oocyte meiosis</b>                   |                                                                                          |      |
|                              | ko:K08045                               | ADCY5; adenylate cyclase 5 [EC:4.6.1.1]                                                  | T up |
|                              | ko:K06669                               | SMC3, CSPG6; structural maintenance of chromosome 3 (chondroitin sulfate proteoglycan 6) | C up |
| <b>ko04210</b>               | <b>Apoptosis</b>                        |                                                                                          |      |
|                              | ko:K02649                               | PIK3R; phosphoinositide-3-kinase, regulatory subunit                                     | T up |
|                              | ko:K02649                               | PIK3R; phosphoinositide-3-kinase, regulatory subunit                                     | T up |
| <b>ko04115</b>               | <b>p53 signaling pathway</b>            |                                                                                          |      |
|                              | ko:K06509                               | KAI1, CD82, TSPAN27; CD82 antigen                                                        | T up |
|                              | ko:K10131                               | PMAIP1; phorbol-12-myristate-13-acetate-induced protein 1                                | C up |
|                              | ko:K10141                               | SESN; sestrin                                                                            | T up |
|                              | ko:K06644                               | SFN; stratifin                                                                           | T up |
| <b>Cell communication</b>    |                                         |                                                                                          |      |
| <b>ko04510</b>               | <b>Focal adhesion</b>                   |                                                                                          |      |
|                              | ko:K06250                               | SPP1, BNSP, OPN; secreted phosphoprotein 1                                               | T up |
|                              | ko:K00907                               | MYLK; myosin-light-chain kinase [EC:2.7.11.18]                                           | T up |
|                              | ko:K06237                               | COL4A; collagen, type IV, alpha                                                          | T up |
|                              | ko:K04514                               | Rock1; Rho-associated protein kinase 1 [EC:2.7.11.1]                                     | T up |
|                              | ko:K12958                               | CAV2; caveolin 2                                                                         | C up |
|                              | ko:K06278                               | CAV1; caveolin 1                                                                         | C up |
|                              | ko:K10351                               | MYL2; myosin regulatory light chain 2                                                    | C up |

|                           |                                            |                                                                   |      |
|---------------------------|--------------------------------------------|-------------------------------------------------------------------|------|
|                           | ko:K06591                                  | ITGB8; integrin beta 8                                            | C up |
|                           | ko:K05717                                  | FN1; fibronectin 1                                                | T up |
|                           | ko:K04349                                  | RASGRF1; Ras-specific guanine nucleotide-releasing factor 1       | C up |
|                           | ko:K16859                                  | PGF; placenta growth factor                                       | T up |
|                           | ko:K06236                                  | COL1A5; collagen, type I/II/III/V/XI/XXIV/XXVII, alpha            | T up |
|                           | ko:K06484                                  | ITGA5; integrin alpha 5                                           | T up |
|                           | ko:K02649                                  | PIK3R; phosphoinositide-3-kinase, regulatory subunit              | T up |
|                           | ko:K02649                                  | PIK3R; phosphoinositide-3-kinase, regulatory subunit              | T up |
|                           | ko:K06240                                  | LAMA3_5; laminin, alpha 3/5                                       | T up |
| <b>ko04520</b>            | <b>Adherens junction</b>                   |                                                                   |      |
|                           | ko:K06086                                  | SORBS1, SH3D5, PONSIN, CAP; sorbin and SH3 domain containing 1    | T up |
| <b>ko04530</b>            | <b>Tight junction</b>                      |                                                                   |      |
|                           | ko:K18052                                  | PRKCQ; novel protein kinase C theta type [EC:2.7.11.13]           | T up |
|                           | ko:K10351                                  | MYL2; myosin regulatory light chain 2                             | C up |
| <b>ko04540</b>            | <b>Gap junction</b>                        |                                                                   |      |
|                           | ko:K08045                                  | ADCY5; adenylate cyclase 5 [EC:4.6.1.1]                           | T up |
|                           | ko:K07375                                  | TUBB; tubulin beta                                                | T up |
|                           | ko:K07375                                  | TUBB; tubulin beta                                                | T up |
|                           |                                            |                                                                   |      |
| <b>Organismal Systems</b> |                                            |                                                                   |      |
| <b>Immune system</b>      |                                            |                                                                   |      |
| <b>ko04640</b>            | <b>Hematopoietic cell lineage</b>          |                                                                   |      |
|                           | ko:K06484                                  | ITGA5; integrin alpha 5                                           | T up |
|                           | ko:K05453                                  | CSF1, MCSF; macrophage colony-stimulating factor 1                | T up |
|                           | ko:K04012                                  | CR2, CD21; complement receptor type 2                             | T up |
| <b>ko04610</b>            | <b>Complement and coagulation cascades</b> |                                                                   |      |
|                           | ko:K03913                                  | SERPINA5, PCI; protein C inhibitor                                | T up |
|                           | ko:K04012                                  | CR2, CD21; complement receptor type 2                             | T up |
|                           | ko:K03909                                  | TFPI; tissue factor pathway inhibitor                             | C up |
|                           | ko:K03990                                  | C3; complement component 3                                        | T up |
|                           | ko:K01314                                  | F10; coagulation factor X [EC:3.4.21.6]                           | T up |
|                           | ko:K03984                                  | SERPINA1, AAT; alpha-1-antitrypsin                                | T up |
| <b>ko04611</b>            | <b>Platelet activation</b>                 |                                                                   |      |
|                           | ko:K00907                                  | MYLK; myosin-light-chain kinase [EC:2.7.11.18]                    | T up |
|                           | ko:K06236                                  | COL1A5; collagen, type I/II/III/V/XI/XXIV/XXVII, alpha            | T up |
|                           | ko:K01832                                  | TBXAS1, CYP5A; thromboxane-A synthase [EC:5.3.99.5]               | T up |
|                           | ko:K00509                                  | PTGS1, COX1; prostaglandin-endoperoxide synthase 1 [EC:1.14.99.1] | T up |
|                           | ko:K12361                                  | RASGRP2; RAS guanyl-releasing protein 2                           | T up |
|                           | ko:K02649                                  | PIK3R; phosphoinositide-3-kinase, regulatory subunit              | T up |
|                           | ko:K02649                                  | PIK3R; phosphoinositide-3-kinase, regulatory subunit              | T up |
|                           | ko:K08045                                  | ADCY5; adenylate cyclase 5 [EC:4.6.1.1]                           | T up |



|                |                                                  |                                                                              |      |
|----------------|--------------------------------------------------|------------------------------------------------------------------------------|------|
|                | ko:K04514                                        | Rock1; Rho-associated protein kinase 1 [EC:2.7.11.1]                         | T up |
| <b>ko04620</b> | <b>Toll-like receptor signaling pathway</b>      |                                                                              |      |
|                | ko:K10030                                        | IL8, CXCL8; interleukin 8                                                    | T up |
|                | ko:K02649                                        | PIK3R; phosphoinositide-3-kinase, regulatory subunit                         | T up |
|                | ko:K02649                                        | PIK3R; phosphoinositide-3-kinase, regulatory subunit                         | T up |
|                | ko:K04415                                        | MAP3K8, COT; mitogen-activated protein kinase kinase kinase 8 [EC:2.7.11.25] | T up |
|                | ko:K06250                                        | SPP1, BNSP, OPN; secreted phosphoprotein 1                                   | T up |
| <b>ko04621</b> | <b>NOD-like receptor signaling pathway</b>       |                                                                              |      |
|                | ko:K09487                                        | HSP90B, TRA1; heat shock protein 90kDa beta                                  | C up |
|                | ko:K10030                                        | IL8, CXCL8; interleukin 8                                                    | T up |
| <b>ko04622</b> | <b>RIG-I-like receptor signaling pathway</b>     |                                                                              |      |
|                | ko:K10030                                        | IL8, CXCL8; interleukin 8                                                    | T up |
|                | ko:K08336                                        | ATG12; ubiquitin-like protein ATG12                                          | C up |
| <b>ko04623</b> | <b>Cytosolic DNA-sensing pathway</b>             |                                                                              |      |
| <b>ko04650</b> | <b>Natural killer cell mediated cytotoxicity</b> |                                                                              |      |
|                | ko:K02649                                        | PIK3R; phosphoinositide-3-kinase, regulatory subunit                         | T up |
|                | ko:K02649                                        | PIK3R; phosphoinositide-3-kinase, regulatory subunit                         | T up |
|                | ko:K07987                                        | RAET1; retinoic acid early transcript 1                                      | T up |
| <b>ko04612</b> | <b>Antigen processing and presentation</b>       |                                                                              |      |
|                | ko:K03283                                        | HSPA1_8; heat shock 70kDa protein 1/8                                        | T up |
| <b>ko04660</b> | <b>T cell receptor signaling pathway</b>         |                                                                              |      |
|                | ko:K02649                                        | PIK3R; phosphoinositide-3-kinase, regulatory subunit                         | T up |
|                | ko:K02649                                        | PIK3R; phosphoinositide-3-kinase, regulatory subunit                         | T up |
|                | ko:K18052                                        | PRKCQ; novel protein kinase C theta type [EC:2.7.11.13]                      | T up |
|                | ko:K04415                                        | MAP3K8, COT; mitogen-activated protein kinase kinase kinase 8 [EC:2.7.11.25] | T up |
| <b>ko04662</b> | <b>B cell receptor signaling pathway</b>         |                                                                              |      |
|                | ko:K04012                                        | CR2, CD21; complement receptor type 2                                        | T up |
|                | ko:K02649                                        | PIK3R; phosphoinositide-3-kinase, regulatory subunit                         | T up |
|                | ko:K02649                                        | PIK3R; phosphoinositide-3-kinase, regulatory subunit                         | T up |
| <b>ko04664</b> | <b>Fc epsilon RI signaling pathway</b>           |                                                                              |      |
|                | ko:K02649                                        | PIK3R; phosphoinositide-3-kinase, regulatory subunit                         | T up |
|                | ko:K02649                                        | PIK3R; phosphoinositide-3-kinase, regulatory subunit                         | T up |
| <b>ko04666</b> | <b>Fc gamma R-mediated phagocytosis</b>          |                                                                              |      |
|                | ko:K01080                                        | PPAP2; phosphatidate phosphatase [EC:3.1.3.4]                                | T up |
|                | ko:K04718                                        | SPHK; sphingosine kinase [EC:2.7.1.91]                                       | T up |
|                | ko:K02649                                        | PIK3R; phosphoinositide-3-kinase, regulatory subunit                         | T up |
|                | ko:K02649                                        | PIK3R; phosphoinositide-3-kinase, regulatory subunit                         | T up |
| <b>ko04670</b> | <b>Leukocyte transendothelial migration</b>      |                                                                              |      |
|                | ko:K02649                                        | PIK3R; phosphoinositide-3-kinase, regulatory subunit                         | T up |
|                | ko:K02649                                        | PIK3R; phosphoinositide-3-kinase, regulatory subunit                         | T up |
|                | ko:K04189                                        | CXCR4; C-X-C chemokine receptor type 4                                       | T up |

|                         |                                                     |                                                                                                |      |
|-------------------------|-----------------------------------------------------|------------------------------------------------------------------------------------------------|------|
|                         | ko:K04514                                           | Rock1; Rho-associated protein kinase 1 [EC:2.7.11.1]                                           | T up |
|                         | ko:K10351                                           | MYL2; myosin regulatory light chain 2                                                          | C up |
| <b>ko04672</b>          | <b>Intestinal immune network for IgA production</b> |                                                                                                |      |
|                         | ko:K04189                                           | CXCR4; C-X-C chemokine receptor type 4                                                         | T up |
|                         | ko:K05433                                           | IL15; interleukin 15                                                                           | T up |
| <b>ko04062</b>          | <b>Chemokine signaling pathway</b>                  |                                                                                                |      |
|                         | ko:K04543                                           | GNG7; guanine nucleotide-binding protein G(I)/G(S)/G(O) subunit gamma-7                        | T up |
|                         | ko:K08045                                           | ADCY5; adenylate cyclase 5 [EC:4.6.1.1]                                                        | T up |
|                         | ko:K10030                                           | IL8, CXCL8; interleukin 8                                                                      | T up |
|                         | ko:K02649                                           | PIK3R; phosphoinositide-3-kinase, regulatory subunit                                           | T up |
|                         | ko:K02649                                           | PIK3R; phosphoinositide-3-kinase, regulatory subunit                                           | T up |
|                         | ko:K12361                                           | RASGRP2; RAS guanyl-releasing protein 2                                                        | T up |
|                         | ko:K12365                                           | PREX1; phosphatidylinositol-3,4,5-trisphosphate-dependent Rac exchanger 1 protein              | T up |
|                         | ko:K04175                                           | IL8RA, CXCR1; interleukin 8 receptor alpha                                                     | T up |
|                         | ko:K04189                                           | CXCR4; C-X-C chemokine receptor type 4                                                         | T up |
|                         | ko:K04514                                           | Rock1; Rho-associated protein kinase 1 [EC:2.7.11.1]                                           | T up |
| <b>Endocrine system</b> |                                                     |                                                                                                |      |
| <b>ko04911</b>          | <b>Insulin secretion</b>                            |                                                                                                |      |
|                         | ko:K09048                                           | CREB3; cyclic AMP-responsive element-binding protein 3                                         | T up |
|                         | ko:K09048                                           | CREB3; cyclic AMP-responsive element-binding protein 3                                         | T up |
|                         | ko:K04944                                           | KCNN3; potassium intermediate/small conductance calcium-activated channel subfamily N member 3 | T up |
|                         | ko:K08045                                           | ADCY5; adenylate cyclase 5 [EC:4.6.1.1]                                                        | T up |
|                         | ko:K16882                                           | PCLO; protein piccolo                                                                          | T up |
| <b>ko04910</b>          | <b>Insulin signaling pathway</b>                    |                                                                                                |      |
|                         | ko:K07192                                           | FLOT; flotillin                                                                                | C up |
|                         | ko:K06086                                           | SORBS1, SH3D5, PONSIN, CAP; sorbin and SH3 domain containing 1                                 | T up |
|                         | ko:K02649                                           | PIK3R; phosphoinositide-3-kinase, regulatory subunit                                           | T up |
|                         | ko:K02649                                           | PIK3R; phosphoinositide-3-kinase, regulatory subunit                                           | T up |
| <b>ko04920</b>          | <b>Adipocytokine signaling pathway</b>              |                                                                                                |      |
|                         | ko:K18052                                           | PRKCQ; novel protein kinase C theta type [EC:2.7.11.13]                                        | T up |
|                         | ko:K08765                                           | CPT1; carnitine O-palmitoyltransferase 1 [EC:2.3.1.21]                                         | T up |
|                         | ko:K05141                                           | TNFRSF1B, TNFR2; tumor necrosis factor receptor superfamily member 1B                          | T up |
| <b>ko03320</b>          | <b>PPAR signaling pathway</b>                       |                                                                                                |      |
|                         | ko:K06086                                           | SORBS1, SH3D5, PONSIN, CAP; sorbin and SH3 domain containing 1                                 | T up |
|                         | ko:K08765                                           | CPT1; carnitine O-palmitoyltransferase 1 [EC:2.3.1.21]                                         | T up |
|                         | ko:K08755                                           | FABP6; fatty acid-binding protein 6, ileal (gastrotropin)                                      | T up |
| <b>ko04912</b>          | <b>GnRH signaling pathway</b>                       |                                                                                                |      |

|                |                                                |                                                                                  |      |
|----------------|------------------------------------------------|----------------------------------------------------------------------------------|------|
|                | ko:K08045                                      | ADCY5; adenylate cyclase 5 [EC:4.6.1.1]                                          | T up |
| <b>ko04913</b> | <b>Ovarian Steroidogenesis</b>                 |                                                                                  |      |
|                | ko:K07418                                      | CYP2J; cytochrome P450, family 2, subfamily J [EC:1.14.14.1]                     | T up |
|                | ko:K07408                                      | CYP1A1; cytochrome P450, family 1, subfamily A, polypeptide 1 [EC:1.14.14.1]     | T up |
|                | ko:K04119                                      | AKR1C3; aldo-keto reductase family 1 member C3 [EC:1.1.1.64 1.1.1.188 1.1.1.213] | T up |
|                | ko:K08045                                      | ADCY5; adenylate cyclase 5 [EC:4.6.1.1]                                          | T up |
| <b>ko04915</b> | <b>Estrogen signaling pathway</b>              |                                                                                  |      |
|                | ko:K08045                                      | ADCY5; adenylate cyclase 5 [EC:4.6.1.1]                                          | T up |
|                | ko:K02649                                      | PIK3R; phosphoinositide-3-kinase, regulatory subunit                             | T up |
|                | ko:K02649                                      | PIK3R; phosphoinositide-3-kinase, regulatory subunit                             | T up |
|                | ko:K03283                                      | HSPA1_8; heat shock 70kDa protein 1/8                                            | T up |
|                | ko:K09048                                      | CREB3; cyclic AMP-responsive element-binding protein 3                           | T up |
|                | ko:K09048                                      | CREB3; cyclic AMP-responsive element-binding protein 3                           | T up |
|                | ko:K09487                                      | HSP90B, TRA1; heat shock protein 90kDa beta                                      | C up |
| <b>ko04914</b> | <b>Progesterone-mediated oocyte maturation</b> |                                                                                  |      |
|                | ko:K08045                                      | ADCY5; adenylate cyclase 5 [EC:4.6.1.1]                                          | T up |
|                | ko:K02649                                      | PIK3R; phosphoinositide-3-kinase, regulatory subunit                             | T up |
|                | ko:K02649                                      | PIK3R; phosphoinositide-3-kinase, regulatory subunit                             | T up |
| <b>ko04917</b> | <b>Prolactin signaling pathway</b>             |                                                                                  |      |
|                | ko:K02649                                      | PIK3R; phosphoinositide-3-kinase, regulatory subunit                             | T up |
|                | ko:K02649                                      | PIK3R; phosphoinositide-3-kinase, regulatory subunit                             | T up |
| <b>ko04921</b> | <b>Oxytocin signaling pathway</b>              |                                                                                  |      |
|                | ko:K04859                                      | CACNA2D2; voltage-dependent calcium channel alpha-2/delta-2                      | T up |
|                | ko:K00907                                      | MYLK; myosin-light-chain kinase [EC:2.7.11.18]                                   | T up |
|                | ko:K08045                                      | ADCY5; adenylate cyclase 5 [EC:4.6.1.1]                                          | T up |
|                | ko:K04514                                      | Rock1; Rho-associated protein kinase 1 [EC:2.7.11.1]                             | T up |
|                | ko:K05005                                      | KCNJ12; potassium inwardly-rectifying channel subfamily J member 12              | T up |
|                | ko:K02649                                      | PIK3R; phosphoinositide-3-kinase, regulatory subunit                             | T up |
|                | ko:K02649                                      | PIK3R; phosphoinositide-3-kinase, regulatory subunit                             | T up |
| <b>ko04918</b> | <b>Thyroid hormone synthesis</b>               |                                                                                  |      |
|                | ko:K09487                                      | HSP90B, TRA1; heat shock protein 90kDa beta                                      | C up |
|                | ko:K08045                                      | ADCY5; adenylate cyclase 5 [EC:4.6.1.1]                                          | T up |
|                | ko:K09490                                      | HSPA5, BIP; heat shock 70kDa protein 5                                           | C up |
|                | ko:K09048                                      | CREB3; cyclic AMP-responsive element-binding protein 3                           | T up |
|                | ko:K09048                                      | CREB3; cyclic AMP-responsive element-binding protein 3                           | T up |
| <b>ko04919</b> | <b>Thyroid hormone signaling pathway</b>       |                                                                                  |      |
|                | ko:K08362                                      | NR1A2, THRB; thyroid hormone receptor beta                                       | T up |
|                | ko:K02599                                      | NOTCH; Notch                                                                     | T up |
|                | ko:K17903                                      | RCAN2, ZAKI4; calcipressin-2                                                     | T up |
|                | ko:K02649                                      | PIK3R; phosphoinositide-3-kinase, regulatory subunit                             | T up |

|                           |                                               |                                                                  |      |
|---------------------------|-----------------------------------------------|------------------------------------------------------------------|------|
|                           | ko:K02649                                     | PIK3R; phosphoinositide-3-kinase, regulatory subunit             | T up |
| <b>ko04916</b>            | <b>Melanogenesis</b>                          |                                                                  |      |
|                           | ko:K02354                                     | FZD4, fz4; frizzled 4                                            | T up |
|                           | ko:K09048                                     | CREB3; cyclic AMP-responsive element-binding protein 3           | T up |
|                           | ko:K09048                                     | CREB3; cyclic AMP-responsive element-binding protein 3           | T up |
|                           | ko:K01384                                     | WNT11; wingless-type MMTV integration site family, member 11     | T up |
|                           | ko:K00445                                     | WNT6; wingless-type MMTV integration site family, member 6       | T up |
|                           | ko:K08045                                     | ADCY5; adenylate cyclase 5 [EC:4.6.1.1]                          | T up |
|                           | ko:K00572                                     | WNT7; wingless-type MMTV integration site family, member 7       | T up |
| <b>ko04614</b>            | <b>Renin-angiotensin system</b>               |                                                                  |      |
| <b>Circulatory system</b> |                                               |                                                                  |      |
| <b>ko04260</b>            | <b>Cardiac muscle contraction</b>             |                                                                  |      |
|                           | ko:K04859                                     | CACNA2D2; voltage-dependent calcium channel alpha-2/delta-2      | T up |
|                           | ko:K10351                                     | MYL2; myosin regulatory light chain 2                            | C up |
| <b>ko04261</b>            | <b>Adrenergic signaling in cardiomyocytes</b> |                                                                  |      |
|                           | ko:K04859                                     | CACNA2D2; voltage-dependent calcium channel alpha-2/delta-2      | T up |
|                           | ko:K09048                                     | CREB3; cyclic AMP-responsive element-binding protein 3           | T up |
|                           | ko:K09048                                     | CREB3; cyclic AMP-responsive element-binding protein 3           | T up |
|                           | ko:K04445                                     | MSK1, RPS6KA5; ribosomal protein S6 kinase alpha-5 [EC:2.7.11.1] | C up |
|                           | ko:K10351                                     | MYL2; myosin regulatory light chain 2                            | C up |
|                           | ko:K04845                                     | SCN1B; voltage-gated sodium channel type I beta                  | T up |
|                           | ko:K08045                                     | ADCY5; adenylate cyclase 5 [EC:4.6.1.1]                          | T up |
|                           | ko:K02649                                     | PIK3R; phosphoinositide-3-kinase, regulatory subunit             | T up |
|                           | ko:K02649                                     | PIK3R; phosphoinositide-3-kinase, regulatory subunit             | T up |
| <b>ko04270</b>            | <b>Vascular smooth muscle contraction</b>     |                                                                  |      |
|                           | ko:K00907                                     | MYLK; myosin-light-chain kinase [EC:2.7.11.18]                   | T up |
|                           | ko:K04266                                     | ADORA2A, ADOR; adenosine receptor A2a                            | T up |
|                           | ko:K18052                                     | PRKCQ; novel protein kinase C theta type [EC:2.7.11.13]          | T up |
|                           | ko:K08045                                     | ADCY5; adenylate cyclase 5 [EC:4.6.1.1]                          | T up |
| <b>Digestive system</b>   |                                               |                                                                  |      |
| <b>ko04970</b>            | <b>Salivary secretion</b>                     |                                                                  |      |
|                           | ko:K08045                                     | ADCY5; adenylate cyclase 5 [EC:4.6.1.1]                          | T up |
| <b>ko04971</b>            | <b>Gastric acid secretion</b>                 |                                                                  |      |
|                           | ko:K00907                                     | MYLK; myosin-light-chain kinase [EC:2.7.11.18]                   | T up |
|                           | ko:K08045                                     | ADCY5; adenylate cyclase 5 [EC:4.6.1.1]                          | T up |
| <b>ko04972</b>            | <b>Pancreatic secretion</b>                   |                                                                  |      |
|                           | ko:K08045                                     | ADCY5; adenylate cyclase 5 [EC:4.6.1.1]                          | T up |
|                           | ko:K07884                                     | RAB3D; Ras-related protein Rab-3D                                | T up |
| <b>ko04976</b>            | <b>Bile secretion</b>                         |                                                                  |      |
|                           | ko:K08045                                     | ADCY5; adenylate cyclase 5 [EC:4.6.1.1]                          | T up |
| <b>ko04973</b>            | <b>Carbohydrate digestion and absorption</b>  |                                                                  |      |
|                           | ko:K02649                                     | PIK3R; phosphoinositide-3-kinase, regulatory subunit             | T up |
|                           | ko:K02649                                     | PIK3R; phosphoinositide-3-kinase, regulatory subunit             | T up |

|                         |                                                                  |                                                                                                    |      |
|-------------------------|------------------------------------------------------------------|----------------------------------------------------------------------------------------------------|------|
| <b>ko04974</b>          | <b>Protein digestion and absorption</b>                          |                                                                                                    |      |
|                         | ko:K13781                                                        | SLC7A8, LAT2; solute carrier family 7 (L-type amino acid transporter), member 8                    | T up |
|                         | ko:K06236                                                        | COL1A5; collagen, type I/II/III/V/XI/XXIV/XXVII, alpha                                             | T up |
|                         | ko:K14207                                                        | SLC38A2, SNAT2; solute carrier family 38 (sodium-coupled neutral amino acid transporter), member 2 | C up |
|                         | ko:K06237                                                        | COL4A; collagen, type IV, alpha                                                                    | T up |
| <b>ko04975</b>          | <b>Fat digestion and absorption</b>                              |                                                                                                    |      |
|                         | ko:K11160                                                        | DGAT2; diacylglycerol O-acyltransferase 2 [EC:2.3.1.20 2.3.1.75]                                   | T up |
|                         | ko:K01080                                                        | PPAP2; phosphatidate phosphatase [EC:3.1.3.4]                                                      | T up |
| <b>ko04977</b>          | <b>Vitamin digestion and absorption</b>                          |                                                                                                    |      |
| <b>ko04978</b>          | <b>Mineral absorption</b>                                        |                                                                                                    |      |
| <b>Excretory system</b> |                                                                  |                                                                                                    |      |
| <b>ko04962</b>          | <b>Vasopressin-regulated water reabsorption</b>                  |                                                                                                    |      |
|                         | ko:K09048                                                        | CREB3; cyclic AMP-responsive element-binding protein 3                                             | T up |
|                         | ko:K09048                                                        | CREB3; cyclic AMP-responsive element-binding protein 3                                             | T up |
| <b>ko04960</b>          | <b>Aldosterone-regulated sodium reabsorption</b>                 |                                                                                                    |      |
|                         | ko:K13302                                                        | SGK1; serum/glucocorticoid-regulated kinase 1 [EC:2.7.11.1]                                        | T up |
|                         | ko:K08555                                                        | NR3C2, MR; mineralocorticoid receptor                                                              | T up |
|                         | ko:K02649                                                        | PIK3R; phosphoinositide-3-kinase, regulatory subunit                                               | T up |
|                         | ko:K02649                                                        | PIK3R; phosphoinositide-3-kinase, regulatory subunit                                               | T up |
| <b>ko04961</b>          | <b>Endocrine and other factor-regulated calcium reabsorption</b> |                                                                                                    |      |
| <b>ko04964</b>          | <b>Proximal tubule bicarbonate reclamation</b>                   |                                                                                                    |      |
| <b>ko04966</b>          | <b>Collecting duct acid secretion</b>                            |                                                                                                    |      |
|                         | ko:K02148                                                        | ATPeV1C, ATP6C; V-type H <sup>+</sup> -transporting ATPase subunit C                               | T up |
| <b>Nervous system</b>   |                                                                  |                                                                                                    |      |
| <b>ko04724</b>          | <b>Glutamatergic synapse</b>                                     |                                                                                                    |      |
|                         | ko:K14207                                                        | SLC38A2, SNAT2; solute carrier family 38 (sodium-coupled neutral amino acid transporter), member 2 | C up |
|                         | ko:K04543                                                        | GNG7; guanine nucleotide-binding protein G(I)/G(S)/G(O) subunit gamma-7                            | T up |
|                         | ko:K08045                                                        | ADCY5; adenylate cyclase 5 [EC:4.6.1.1]                                                            | T up |
|                         | ko:K15009                                                        | SHANK; SH3 and multiple ankyrin repeat domains protein                                             | T up |
|                         | ko:K05205                                                        | GRIK5; glutamate receptor, ionotropic kainate 5                                                    | T up |
|                         | ko:K04607                                                        | GRM4; metabotropic glutamate receptor 4                                                            | T up |
| <b>ko04727</b>          | <b>GABAergic synapse</b>                                         |                                                                                                    |      |
|                         | ko:K04543                                                        | GNG7; guanine nucleotide-binding protein G(I)/G(S)/G(O) subunit gamma-7                            | T up |
|                         | ko:K08045                                                        | ADCY5; adenylate cyclase 5 [EC:4.6.1.1]                                                            | T up |
|                         | ko:K05184                                                        | GABRD; gamma-aminobutyric acid receptor subunit delta                                              | T up |
|                         | ko:K04647                                                        | HAP1; huntingtin-associated protein 1                                                              | T up |
|                         | ko:K14207                                                        | SLC38A2, SNAT2; solute carrier family 38 (sodium-coupled neutral amino acid transporter), member 2 | C up |

|                |                                             |                                                                         |      |
|----------------|---------------------------------------------|-------------------------------------------------------------------------|------|
| <b>ko04725</b> | <b>Cholinergic synapse</b>                  |                                                                         |      |
|                | ko:K01049                                   | ACHE; acetylcholinesterase [EC:3.1.1.7]                                 | T up |
|                | ko:K09048                                   | CREB3; cyclic AMP-responsive element-binding protein 3                  | T up |
|                | ko:K09048                                   | CREB3; cyclic AMP-responsive element-binding protein 3                  | T up |
|                | ko:K02649                                   | PIK3R; phosphoinositide-3-kinase, regulatory subunit                    | T up |
|                | ko:K02649                                   | PIK3R; phosphoinositide-3-kinase, regulatory subunit                    | T up |
|                | ko:K05005                                   | KCNJ12; potassium inwardly-rectifying channel subfamily J member 12     | T up |
|                | ko:K04132                                   | CHRM4; muscarinic acetylcholine receptor M4                             | T up |
|                | ko:K08045                                   | ADCY5; adenylate cyclase 5 [EC:4.6.1.1]                                 | T up |
|                | ko:K04543                                   | GNG7; guanine nucleotide-binding protein G(I)/G(S)/G(O) subunit gamma-7 | T up |
| <b>ko04728</b> | <b>Dopaminergic synapse</b>                 |                                                                         |      |
|                | ko:K04543                                   | GNG7; guanine nucleotide-binding protein G(I)/G(S)/G(O) subunit gamma-7 | T up |
|                | ko:K08045                                   | ADCY5; adenylate cyclase 5 [EC:4.6.1.1]                                 | T up |
|                | ko:K04633                                   | GNAL; guanine nucleotide-binding protein G(olf) subunit alpha           | T up |
|                | ko:K09048                                   | CREB3; cyclic AMP-responsive element-binding protein 3                  | T up |
|                | ko:K09048                                   | CREB3; cyclic AMP-responsive element-binding protein 3                  | T up |
| <b>ko04726</b> | <b>Serotonergic synapse</b>                 |                                                                         |      |
|                | ko:K07418                                   | CYP2J; cytochrome P450, family 2, subfamily J [EC:1.14.14.1]            | T up |
|                | ko:K00509                                   | PTGS1, COX1; prostaglandin-endoperoxide synthase 1 [EC:1.14.99.1]       | T up |
|                | ko:K04543                                   | GNG7; guanine nucleotide-binding protein G(I)/G(S)/G(O) subunit gamma-7 | T up |
|                | ko:K08045                                   | ADCY5; adenylate cyclase 5 [EC:4.6.1.1]                                 | T up |
|                | ko:K04153                                   | HTR1; 5-hydroxytryptamine receptor 1                                    | T up |
| <b>ko04720</b> | <b>Long-term potentiation</b>               |                                                                         |      |
| <b>ko04730</b> | <b>Long-term depression</b>                 |                                                                         |      |
| <b>ko04723</b> | <b>Retrograde endocannabinoid signaling</b> |                                                                         |      |
|                | ko:K04543                                   | GNG7; guanine nucleotide-binding protein G(I)/G(S)/G(O) subunit gamma-7 | T up |
|                | ko:K08045                                   | ADCY5; adenylate cyclase 5 [EC:4.6.1.1]                                 | T up |
|                | ko:K05184                                   | GABRD; gamma-aminobutyric acid receptor subunit delta                   | T up |
|                | ko:K13700                                   | ABHD6; abhydrolase domain-containing protein 6 [EC:3.1.1.23]            | T up |
| <b>ko04721</b> | <b>Synaptic vesicle cycle</b>               |                                                                         |      |
|                | ko:K02148                                   | ATPeV1C, ATP6C; V-type H <sup>+</sup> -transporting ATPase subunit C    | T up |
|                | ko:K15294                                   | CPLX1_2; complexin-1/2                                                  | T up |
| <b>ko04722</b> | <b>Neurotrophin signaling pathway</b>       |                                                                         |      |
|                | ko:K02583                                   | NGFR; nerve growth factor receptor (TNFR superfamily member 16)         | T up |
|                | ko:K04445                                   | MSK1, RPS6KA5; ribosomal protein S6 kinase alpha-5 [EC:2.7.11.1]        | C up |
|                | ko:K02649                                   | PIK3R; phosphoinositide-3-kinase, regulatory subunit                    | T up |
|                | ko:K02649                                   | PIK3R; phosphoinositide-3-kinase, regulatory subunit                    | T up |

|                       |                                                         |                                                                         |      |
|-----------------------|---------------------------------------------------------|-------------------------------------------------------------------------|------|
| <b>Sensory system</b> |                                                         |                                                                         |      |
| <b>ko04744</b>        | <b>Phototransduction</b>                                |                                                                         |      |
|                       | ko:K13765                                               | RGS9; regulator of G-protein signaling 9                                | T up |
| <b>ko04740</b>        | <b>Olfactory transduction</b>                           |                                                                         |      |
|                       | ko:K04633                                               | GNAL; guanine nucleotide-binding protein G(olf) subunit alpha           | T up |
| <b>ko04742</b>        | <b>Taste transduction</b>                               |                                                                         |      |
|                       | ko:K04607                                               | GRM4; metabotropic glutamate receptor 4                                 | T up |
| <b>ko04750</b>        | <b>Inflammatory mediator regulation of TRP channels</b> |                                                                         |      |
|                       | ko:K04971                                               | TRPV2; transient receptor potential cation channel subfamily V member 2 | T up |
|                       | ko:K02649                                               | PIK3R; phosphoinositide-3-kinase, regulatory subunit                    | T up |
|                       | ko:K02649                                               | PIK3R; phosphoinositide-3-kinase, regulatory subunit                    | T up |
|                       | ko:K08045                                               | ADCY5; adenylate cyclase 5 [EC:4.6.1.1]                                 | T up |
|                       | ko:K07418                                               | CYP2J; cytochrome P450, family 2, subfamily J [EC:1.14.14.1]            | T up |
|                       | ko:K18052                                               | PRKCQ; novel protein kinase C theta type [EC:2.7.11.13]                 | T up |
| <b>Development</b>    |                                                         |                                                                         |      |
| <b>ko04320</b>        | <b>Dorso-ventral axis formation</b>                     |                                                                         |      |
|                       | ko:K02599                                               | NOTCH; Notch                                                            | T up |
| <b>ko04360</b>        | <b>Axon guidance</b>                                    |                                                                         |      |
|                       | ko:K06820                                               | PLXNA; plexin A                                                         | T up |
|                       | ko:K16359                                               | NTNG2; netrin-G2                                                        | T up |
|                       | ko:K06838                                               | SLIT1; slit 1                                                           | T up |
|                       | ko:K06842                                               | SEMA6; semaphorin 6                                                     | T up |
|                       | ko:K06842                                               | SEMA6; semaphorin 6                                                     | T up |
|                       | ko:K06550                                               | L1CAM; L1 cell adhesion molecule                                        | T up |
|                       | ko:K05114                                               | EPHB6; Eph receptor B6 [EC:2.7.10.1]                                    | T up |
|                       | ko:K06521                                               | SEMA4; semaphorin 4                                                     | T up |
|                       | ko:K06843                                               | NTN1; netrin 1                                                          | T up |
|                       | ko:K05462                                               | EFNA; ephrin-A                                                          | T up |
|                       | ko:K05462                                               | EFNA; ephrin-A                                                          | T up |
|                       | ko:K04189                                               | CXCR4; C-X-C chemokine receptor type 4                                  | T up |
|                       | ko:K07529                                               | DPYSL5, CRAM; dihydropyrimidinase-like 5                                | T up |
|                       | ko:K06840                                               | SEMA3; semaphorin 3                                                     | T up |
|                       | ko:K06840                                               | SEMA3; semaphorin 3                                                     | T up |
|                       | ko:K05112                                               | EPHB3, HEK2, ETK2; Eph receptor B3 [EC:2.7.10.1]                        | T up |
| <b>ko04380</b>        | <b>Osteoclast differentiation</b>                       |                                                                         |      |
|                       | ko:K05453                                               | CSF1, MCSF; macrophage colony-stimulating factor 1                      | T up |
|                       | ko:K02649                                               | PIK3R; phosphoinositide-3-kinase, regulatory subunit                    | T up |
|                       | ko:K02649                                               | PIK3R; phosphoinositide-3-kinase, regulatory subunit                    | T up |
| <b>ko04713</b>        | <b>Circadian entrainment</b>                            |                                                                         |      |
|                       | ko:K04543                                               | GNG7; guanine nucleotide-binding protein G(I)/G(S)/G(O) subunit gamma-7 | T up |
|                       | ko:K08045                                               | ADCY5; adenylate cyclase 5 [EC:4.6.1.1]                                 | T up |

|                       |                                                 |                                                                  |      |
|-----------------------|-------------------------------------------------|------------------------------------------------------------------|------|
|                       | ko:K04854                                       | CACNA1G; voltage-dependent calcium channel T type alpha-1G       | T up |
|                       | ko:K04445                                       | MSK1, RPS6KA5; ribosomal protein S6 kinase alpha-5 [EC:2.7.11.1] | C up |
| <b>ko04626</b>        | <b>Plant-pathogen interaction</b>               |                                                                  |      |
|                       | ko:K09487                                       | HSP90B, TRA1; heat shock protein 90kDa beta                      | C up |
|                       |                                                 |                                                                  |      |
| <b>Human Diseases</b> |                                                 |                                                                  |      |
| <b>Cancers</b>        |                                                 |                                                                  |      |
| <b>ko05200</b>        | <b>Pathways in cancer</b>                       |                                                                  |      |
|                       | ko:K00572                                       | WNT7; wntless-type MMTV integration site family, member 7        | T up |
|                       | ko:K10030                                       | IL8, CXCL8; interleukin 8                                        | T up |
|                       | ko:K06240                                       | LAMA3_5; laminin, alpha 3/5                                      | T up |
|                       | ko:K02649                                       | PIK3R; phosphoinositide-3-kinase, regulatory subunit             | T up |
|                       | ko:K02649                                       | PIK3R; phosphoinositide-3-kinase, regulatory subunit             | T up |
|                       | ko:K08775                                       | BRCA2, FANCD1; breast cancer 2 susceptibility protein            | C up |
|                       | ko:K00445                                       | WNT6; wntless-type MMTV integration site family, member 6        | T up |
|                       | ko:K01384                                       | WNT11; wntless-type MMTV integration site family, member 11      | T up |
|                       | ko:K16859                                       | PGF; placenta growth factor                                      | T up |
|                       | ko:K05126                                       | RET; proto-oncogene tyrosine-protein kinase Ret [EC:2.7.10.1]    | T up |
|                       | ko:K09348                                       | NKX3-1; homeobox protein Nkx-3.1                                 | T up |
|                       | ko:K05717                                       | FN1; fibronectin 1                                               | T up |
|                       | ko:K06237                                       | COL4A; collagen, type IV, alpha                                  | T up |
|                       | ko:K02354                                       | FZD4, fz4; frizzled 4                                            | T up |
|                       | ko:K16798                                       | GLI2; zinc finger protein GLI2                                   | T up |
|                       | ko:K04514                                       | Rock1; Rho-associated protein kinase 1 [EC:2.7.11.1]             | T up |
|                       | ko:K09487                                       | HSP90B, TRA1; heat shock protein 90kDa beta                      | C up |
| <b>ko05202</b>        | <b>Transcriptional misregulation in cancers</b> |                                                                  |      |
|                       | ko:K09355                                       | PBX1; pre-B-cell leukemia transcription factor 1                 | T up |
|                       | ko:K15187                                       | MLLT1_3, ENL, AF9; YEATS domain-containing protein 1/3           | T up |
|                       | ko:K04452                                       | DDIT3, GADD153; DNA damage-inducible transcript 3                | C up |
|                       | ko:K02583                                       | NGFR; nerve growth factor receptor (TNFR superfamily member 16)  | T up |
|                       | ko:K06622                                       | CDKN2C, P18, INK4C; cyclin-dependent kinase inhibitor 2C         | T up |
|                       | ko:K10030                                       | IL8, CXCL8; interleukin 8                                        | T up |
| <b>ko05206</b>        | <b>MicroRNAs in cancer</b>                      |                                                                  |      |
|                       | ko:K16866                                       | TIMP3; metalloproteinase inhibitor 3                             | T up |
|                       | ko:K17460                                       | BMF; Bcl-2-modifying factor                                      | T up |
|                       | ko:K16865                                       | PDCD4; programmed cell death protein 4                           | C up |
|                       | ko:K04445                                       | MSK1, RPS6KA5; ribosomal protein S6 kinase alpha-5 [EC:2.7.11.1] | C up |
|                       | ko:K10605                                       | BRCA1; breast cancer type 1 susceptibility protein               | C up |
|                       | ko:K06484                                       | ITGA5; integrin alpha 5                                          | T up |
|                       | ko:K02599                                       | NOTCH; Notch                                                     | T up |
| <b>ko05205</b>        | <b>Proteoglycans in cancer</b>                  |                                                                  |      |
|                       | ko:K01384                                       | WNT11; wntless-type MMTV integration site family, member 11      | T up |
|                       | ko:K00445                                       | WNT6; wntless-type MMTV integration site family, member 6        | T up |



|                |                                 |                                                                              |      |
|----------------|---------------------------------|------------------------------------------------------------------------------|------|
|                | ko:K02649                       | PIK3R; phosphoinositide-3-kinase, regulatory subunit                         | T up |
|                | ko:K02649                       | PIK3R; phosphoinositide-3-kinase, regulatory subunit                         | T up |
|                | ko:K00572                       | WNT7; wingless-type MMTV integration site family, member 7                   | T up |
|                | ko:K06484                       | ITGA5; integrin alpha 5                                                      | T up |
|                | ko:K16865                       | PDCD4; programmed cell death protein 4                                       | C up |
|                | ko:K06278                       | CAV1; caveolin 1                                                             | C up |
|                | ko:K12958                       | CAV2; caveolin 2                                                             | C up |
|                | ko:K05717                       | FN1; fibronectin 1                                                           | T up |
|                | ko:K16866                       | TIMP3; metalloproteinase inhibitor 3                                         | T up |
|                | ko:K02354                       | FZD4, fz4; frizzled 4                                                        | T up |
| <b>ko05204</b> | <b>Chemical carcinogenesis</b>  |                                                                              |      |
|                | ko:K00799                       | GST, gst; glutathione S-transferase [EC:2.5.1.18]                            | T up |
|                | ko:K07408                       | CYP1A1; cytochrome P450, family 1, subfamily A, polypeptide 1 [EC:1.14.14.1] | T up |
| <b>ko05203</b> | <b>Viral carcinogenesis</b>     |                                                                              |      |
|                | ko:K09048                       | CREB3; cyclic AMP-responsive element-binding protein 3                       | T up |
|                | ko:K09048                       | CREB3; cyclic AMP-responsive element-binding protein 3                       | T up |
|                | ko:K03990                       | C3; complement component 3                                                   | T up |
|                | ko:K10131                       | PMAIP1; phorbol-12-myristate-13-acetate-induced protein 1                    | C up |
|                | ko:K02649                       | PIK3R; phosphoinositide-3-kinase, regulatory subunit                         | T up |
|                | ko:K02649                       | PIK3R; phosphoinositide-3-kinase, regulatory subunit                         | T up |
| <b>ko05210</b> | <b>Colorectal cancer</b>        |                                                                              |      |
|                | ko:K02649                       | PIK3R; phosphoinositide-3-kinase, regulatory subunit                         | T up |
|                | ko:K02649                       | PIK3R; phosphoinositide-3-kinase, regulatory subunit                         | T up |
| <b>ko05212</b> | <b>Pancreatic cancer</b>        |                                                                              |      |
|                | ko:K08775                       | BRCA2, FANCD1; breast cancer 2 susceptibility protein                        | C up |
|                | ko:K02649                       | PIK3R; phosphoinositide-3-kinase, regulatory subunit                         | T up |
|                | ko:K02649                       | PIK3R; phosphoinositide-3-kinase, regulatory subunit                         | T up |
| <b>ko05214</b> | <b>Glioma</b>                   |                                                                              |      |
|                | ko:K02649                       | PIK3R; phosphoinositide-3-kinase, regulatory subunit                         | T up |
|                | ko:K02649                       | PIK3R; phosphoinositide-3-kinase, regulatory subunit                         | T up |
| <b>ko05216</b> | <b>Thyroid cancer</b>           |                                                                              |      |
|                | ko:K05126                       | RET; proto-oncogene tyrosine-protein kinase Ret [EC:2.7.10.1]                | T up |
| <b>ko05221</b> | <b>Acute myeloid leukemia</b>   |                                                                              |      |
|                | ko:K02649                       | PIK3R; phosphoinositide-3-kinase, regulatory subunit                         | T up |
|                | ko:K02649                       | PIK3R; phosphoinositide-3-kinase, regulatory subunit                         | T up |
| <b>ko05220</b> | <b>Chronic myeloid leukemia</b> |                                                                              |      |
|                | ko:K02649                       | PIK3R; phosphoinositide-3-kinase, regulatory subunit                         | T up |
|                | ko:K02649                       | PIK3R; phosphoinositide-3-kinase, regulatory subunit                         | T up |
| <b>ko05217</b> | <b>Basal cell carcinoma</b>     |                                                                              |      |
|                | ko:K00572                       | WNT7; wingless-type MMTV integration site family, member 7                   | T up |
|                | ko:K02354                       | FZD4, fz4; frizzled 4                                                        | T up |
|                | ko:K16798                       | GLI2; zinc finger protein GLI2                                               | T up |

|                                   |                                         |                                                                      |      |
|-----------------------------------|-----------------------------------------|----------------------------------------------------------------------|------|
|                                   | ko:K00445                               | WNT6; wingless-type MMTV integration site family, member 6           | T up |
|                                   | ko:K01384                               | WNT11; wingless-type MMTV integration site family, member 11         | T up |
| <b>ko05218</b>                    | <b>Melanoma</b>                         |                                                                      |      |
|                                   | ko:K02649                               | PIK3R; phosphoinositide-3-kinase, regulatory subunit                 | T up |
|                                   | ko:K02649                               | PIK3R; phosphoinositide-3-kinase, regulatory subunit                 | T up |
| <b>ko05211</b>                    | <b>Renal cell carcinoma</b>             |                                                                      |      |
|                                   | ko:K02649                               | PIK3R; phosphoinositide-3-kinase, regulatory subunit                 | T up |
|                                   | ko:K02649                               | PIK3R; phosphoinositide-3-kinase, regulatory subunit                 | T up |
| <b>ko05219</b>                    | <b>Bladder cancer</b>                   |                                                                      |      |
|                                   | ko:K10030                               | IL8, CXCL8; interleukin 8                                            | T up |
|                                   | ko:K04445                               | MSK1, RPS6KA5; ribosomal protein S6 kinase alpha-5 [EC:2.7.11.1]     | C up |
| <b>ko05215</b>                    | <b>Prostate cancer</b>                  |                                                                      |      |
|                                   | ko:K09487                               | HSP90B, TRA1; heat shock protein 90kDa beta                          | C up |
|                                   | ko:K09048                               | CREB3; cyclic AMP-responsive element-binding protein 3               | T up |
|                                   | ko:K09048                               | CREB3; cyclic AMP-responsive element-binding protein 3               | T up |
|                                   | ko:K02649                               | PIK3R; phosphoinositide-3-kinase, regulatory subunit                 | T up |
|                                   | ko:K02649                               | PIK3R; phosphoinositide-3-kinase, regulatory subunit                 | T up |
|                                   | ko:K09348                               | NKX3-1; homeobox protein Nkx-3.1                                     | T up |
| <b>ko05213</b>                    | <b>Endometrial cancer</b>               |                                                                      |      |
|                                   | ko:K02649                               | PIK3R; phosphoinositide-3-kinase, regulatory subunit                 | T up |
|                                   | ko:K02649                               | PIK3R; phosphoinositide-3-kinase, regulatory subunit                 | T up |
| <b>ko05222</b>                    | <b>Small cell lung cancer</b>           |                                                                      |      |
|                                   | ko:K05717                               | FN1; fibronectin 1                                                   | T up |
|                                   | ko:K06240                               | LAMA3_5; laminin, alpha 3/5                                          | T up |
|                                   | ko:K02649                               | PIK3R; phosphoinositide-3-kinase, regulatory subunit                 | T up |
|                                   | ko:K02649                               | PIK3R; phosphoinositide-3-kinase, regulatory subunit                 | T up |
|                                   | ko:K06237                               | COL4A; collagen, type IV, alpha                                      | T up |
| <b>ko05223</b>                    | <b>Non-small cell lung cancer</b>       |                                                                      |      |
|                                   | ko:K02649                               | PIK3R; phosphoinositide-3-kinase, regulatory subunit                 | T up |
|                                   | ko:K02649                               | PIK3R; phosphoinositide-3-kinase, regulatory subunit                 | T up |
| <b>Immune diseases</b>            |                                         |                                                                      |      |
| <b>ko05322</b>                    | <b>Systemic lupus erythematosus</b>     |                                                                      |      |
|                                   | ko:K03990                               | C3; complement component 3                                           | T up |
| <b>ko05323</b>                    | <b>Rheumatoid arthritis</b>             |                                                                      |      |
|                                   | ko:K10030                               | IL8, CXCL8; interleukin 8                                            | T up |
|                                   | ko:K05453                               | CSF1, MCSF; macrophage colony-stimulating factor 1                   | T up |
|                                   | ko:K02148                               | ATPeV1C, ATP6C; V-type H <sup>+</sup> -transporting ATPase subunit C | T up |
|                                   | ko:K05433                               | IL15; interleukin 15                                                 | T up |
| <b>ko05320</b>                    | <b>Autoimmune thyroid disease</b>       |                                                                      |      |
| <b>ko05321</b>                    | <b>Inflammatory bowel disease (IBD)</b> |                                                                      |      |
|                                   | ko:K11222                               | STAT4; signal transducer and activator of transcription 4            | T up |
| <b>Neurodegenerative diseases</b> |                                         |                                                                      |      |
| <b>ko05010</b>                    | <b>Alzheimer's disease</b>              |                                                                      |      |

|                                |                                            |                                                                                                 |      |
|--------------------------------|--------------------------------------------|-------------------------------------------------------------------------------------------------|------|
|                                | ko:K04550                                  | LRP1, CD91; low-density lipoprotein receptor-related protein 1 (alpha-2-macroglobulin receptor) | T up |
| <b>ko05012</b>                 | <b>Parkinson's disease</b>                 |                                                                                                 |      |
|                                | ko:K04266                                  | ADORA2A, ADOR; adenosine receptor A2a                                                           | T up |
|                                | ko:K04633                                  | GNAL; guanine nucleotide-binding protein G(olf) subunit alpha                                   | T up |
|                                | ko:K08045                                  | ADCY5; adenylate cyclase 5 [EC:4.6.1.1]                                                         | T up |
| <b>ko05014</b>                 | <b>Amyotrophic lateral sclerosis (ALS)</b> |                                                                                                 |      |
|                                | ko:K05141                                  | TNFRSF1B, TNFR2; tumor necrosis factor receptor superfamily member 1B                           | T up |
| <b>ko05016</b>                 | <b>Huntington's disease</b>                |                                                                                                 |      |
|                                | ko:K04647                                  | HAP1; huntingtin-associated protein 1                                                           | T up |
|                                | ko:K09048                                  | CREB3; cyclic AMP-responsive element-binding protein 3                                          | T up |
|                                | ko:K09048                                  | CREB3; cyclic AMP-responsive element-binding protein 3                                          | T up |
|                                | ko:K10408                                  | DNAH; dynein heavy chain, axonemal                                                              | C up |
| <b>ko05020</b>                 | <b>Prion diseases</b>                      |                                                                                                 |      |
|                                | ko:K09490                                  | HSPA5, BIP; heat shock 70kDa protein 5                                                          | C up |
| <b>Substance dependence</b>    |                                            |                                                                                                 |      |
| <b>ko05030</b>                 | <b>Cocaine addiction</b>                   |                                                                                                 |      |
|                                | ko:K13765                                  | RGS9; regulator of G-protein signaling 9                                                        | T up |
|                                | ko:K08045                                  | ADCY5; adenylate cyclase 5 [EC:4.6.1.1]                                                         | T up |
|                                | ko:K09048                                  | CREB3; cyclic AMP-responsive element-binding protein 3                                          | T up |
|                                | ko:K09048                                  | CREB3; cyclic AMP-responsive element-binding protein 3                                          | T up |
| <b>ko05031</b>                 | <b>Amphetamine addiction</b>               |                                                                                                 |      |
|                                | ko:K09048                                  | CREB3; cyclic AMP-responsive element-binding protein 3                                          | T up |
|                                | ko:K09048                                  | CREB3; cyclic AMP-responsive element-binding protein 3                                          | T up |
|                                | ko:K08045                                  | ADCY5; adenylate cyclase 5 [EC:4.6.1.1]                                                         | T up |
| <b>ko05032</b>                 | <b>Morphine addiction</b>                  |                                                                                                 |      |
|                                | ko:K08045                                  | ADCY5; adenylate cyclase 5 [EC:4.6.1.1]                                                         | T up |
|                                | ko:K04543                                  | GNG7; guanine nucleotide-binding protein G(I)/G(S)/G(O) subunit gamma-7                         | T up |
|                                | ko:K04265                                  | ADORA1; adenosine A1 receptor                                                                   | T up |
|                                | ko:K05184                                  | GABRD; gamma-aminobutyric acid receptor subunit delta                                           | T up |
| <b>ko05033</b>                 | <b>Nicotine addiction</b>                  |                                                                                                 |      |
|                                | ko:K05184                                  | GABRD; gamma-aminobutyric acid receptor subunit delta                                           | T up |
| <b>ko05034</b>                 | <b>Alcoholism</b>                          |                                                                                                 |      |
|                                | ko:K04266                                  | ADORA2A, ADOR; adenosine receptor A2a                                                           | T up |
|                                | ko:K09048                                  | CREB3; cyclic AMP-responsive element-binding protein 3                                          | T up |
|                                | ko:K09048                                  | CREB3; cyclic AMP-responsive element-binding protein 3                                          | T up |
|                                | ko:K04543                                  | GNG7; guanine nucleotide-binding protein G(I)/G(S)/G(O) subunit gamma-7                         | T up |
|                                | ko:K08045                                  | ADCY5; adenylate cyclase 5 [EC:4.6.1.1]                                                         | T up |
| <b>Cardiovascular diseases</b> |                                            |                                                                                                 |      |
| <b>ko05410</b>                 | <b>Hypertrophic cardiomyopathy (HCM)</b>   |                                                                                                 |      |

|                                         |                                                                   |                                                                      |      |
|-----------------------------------------|-------------------------------------------------------------------|----------------------------------------------------------------------|------|
|                                         | ko:K06591                                                         | ITGB8; integrin beta 8                                               | C up |
|                                         | ko:K10351                                                         | MYL2; myosin regulatory light chain 2                                | C up |
|                                         | ko:K06484                                                         | ITGA5; integrin alpha 5                                              | T up |
|                                         | ko:K07610                                                         | DES; desmin                                                          | T up |
|                                         | ko:K04859                                                         | CACNA2D2; voltage-dependent calcium channel alpha-2/delta-2          | T up |
| <b>ko05412</b>                          | <b>Arrhythmogenic right ventricular cardiomyopathy (ARVC)</b>     |                                                                      |      |
|                                         | ko:K06591                                                         | ITGB8; integrin beta 8                                               | C up |
|                                         | ko:K06484                                                         | ITGA5; integrin alpha 5                                              | T up |
|                                         | ko:K07610                                                         | DES; desmin                                                          | T up |
|                                         | ko:K04859                                                         | CACNA2D2; voltage-dependent calcium channel alpha-2/delta-2          | T up |
| <b>ko05414</b>                          | <b>Dilated cardiomyopathy (DCM)</b>                               |                                                                      |      |
|                                         | ko:K06484                                                         | ITGA5; integrin alpha 5                                              | T up |
|                                         | ko:K07610                                                         | DES; desmin                                                          | T up |
|                                         | ko:K04859                                                         | CACNA2D2; voltage-dependent calcium channel alpha-2/delta-2          | T up |
|                                         | ko:K08045                                                         | ADCY5; adenylate cyclase 5 [EC:4.6.1.1]                              | T up |
|                                         | ko:K10351                                                         | MYL2; myosin regulatory light chain 2                                | C up |
|                                         | ko:K06591                                                         | ITGB8; integrin beta 8                                               | C up |
| <b>ko05416</b>                          | <b>Viral myocarditis</b>                                          |                                                                      |      |
|                                         | ko:K06278                                                         | CAV1; caveolin 1                                                     | C up |
| <b>Endocrine and metabolic diseases</b> |                                                                   |                                                                      |      |
| <b>ko04930</b>                          | <b>Type II diabetes mellitus</b>                                  |                                                                      |      |
|                                         | ko:K02649                                                         | PIK3R; phosphoinositide-3-kinase, regulatory subunit                 | T up |
|                                         | ko:K02649                                                         | PIK3R; phosphoinositide-3-kinase, regulatory subunit                 | T up |
|                                         | ko:K04854                                                         | CACNA1G; voltage-dependent calcium channel T type alpha-1G           | T up |
| <b>ko04950</b>                          | <b>Maturity onset diabetes of the young</b>                       |                                                                      |      |
|                                         | ko:K08027                                                         | NR5A2, FTF; nuclear receptor subfamily 5 group A member 2            | T up |
| <b>ko04932</b>                          | <b>Non-alcoholic fatty liver disease (NAFLD)</b>                  |                                                                      |      |
|                                         | ko:K02649                                                         | PIK3R; phosphoinositide-3-kinase, regulatory subunit                 | T up |
|                                         | ko:K02649                                                         | PIK3R; phosphoinositide-3-kinase, regulatory subunit                 | T up |
|                                         | ko:K10030                                                         | IL8, CXCL8; interleukin 8                                            | T up |
|                                         | ko:K04452                                                         | DDIT3, GADD153; DNA damage-inducible transcript 3                    | C up |
| <b>Infectious diseases</b>              |                                                                   |                                                                      |      |
| <b>ko05110</b>                          | <b>Vibrio cholerae infection</b>                                  |                                                                      |      |
|                                         | ko:K02148                                                         | ATPeV1C, ATP6C; V-type H <sup>+</sup> -transporting ATPase subunit C | T up |
| <b>ko05120</b>                          | <b>Epithelial cell signaling in Helicobacter pylori infection</b> |                                                                      |      |
|                                         | ko:K02148                                                         | ATPeV1C, ATP6C; V-type H <sup>+</sup> -transporting ATPase subunit C | T up |
|                                         | ko:K04175                                                         | IL8RA, CXCR1; interleukin 8 receptor alpha                           | T up |
|                                         | ko:K10030                                                         | IL8, CXCL8; interleukin 8                                            | T up |
| <b>ko05130</b>                          | <b>Pathogenic Escherichia coli infection</b>                      |                                                                      |      |
|                                         | ko:K07375                                                         | TUBB; tubulin beta                                                   | T up |
|                                         | ko:K07375                                                         | TUBB; tubulin beta                                                   | T up |
| <b>ko05132</b>                          | <b>Salmonella infection</b>                                       |                                                                      |      |
|                                         | ko:K07898                                                         | RAB7B; Ras-related protein Rab-7B                                    | T up |

|                |                                               |                                                              |      |
|----------------|-----------------------------------------------|--------------------------------------------------------------|------|
|                | ko:K10030                                     | IL8, CXCL8; interleukin 8                                    | T up |
| <b>ko05131</b> | <b>Shigellosis</b>                            |                                                              |      |
|                | ko:K10030                                     | IL8, CXCL8; interleukin 8                                    | T up |
|                | ko:K06484                                     | ITGA5; integrin alpha 5                                      | T up |
| <b>ko05133</b> | <b>Pertussis</b>                              |                                                              |      |
|                | ko:K06484                                     | ITGA5; integrin alpha 5                                      | T up |
|                | ko:K03990                                     | C3; complement component 3                                   | T up |
|                | ko:K10030                                     | IL8, CXCL8; interleukin 8                                    | T up |
| <b>ko05134</b> | <b>Legionellosis</b>                          |                                                              |      |
|                | ko:K10030                                     | IL8, CXCL8; interleukin 8                                    | T up |
|                | ko:K03283                                     | HSPA1_8; heat shock 70kDa protein 1/8                        | T up |
|                | ko:K03990                                     | C3; complement component 3                                   | T up |
| <b>ko05150</b> | <b>Staphylococcus aureus infection</b>        |                                                              |      |
|                | ko:K03990                                     | C3; complement component 3                                   | T up |
| <b>ko05152</b> | <b>Tuberculosis</b>                           |                                                              |      |
|                | ko:K04718                                     | SPHK; sphingosine kinase [EC:2.7.1.91]                       | T up |
|                | ko:K03990                                     | C3; complement component 3                                   | T up |
|                | ko:K06560                                     | MRC; mannose receptor, C type                                | T up |
|                | ko:K05134                                     | IL10RA; interleukin 10 receptor alpha                        | T up |
|                | ko:K10049                                     | CEBPG; CCAAT/enhancer binding protein (C/EBP), gamma         | C up |
| <b>ko05100</b> | <b>Bacterial invasion of epithelial cells</b> |                                                              |      |
|                | ko:K06484                                     | ITGA5; integrin alpha 5                                      | T up |
|                | ko:K16938                                     | SEPT3_9_12; septin 3/9/12                                    | T up |
|                | ko:K05717                                     | FN1; fibronectin 1                                           | T up |
|                | ko:K06278                                     | CAV1; caveolin 1                                             | C up |
|                | ko:K12958                                     | CAV2; caveolin 2                                             | C up |
|                | ko:K02649                                     | PIK3R; phosphoinositide-3-kinase, regulatory subunit         | T up |
|                | ko:K02649                                     | PIK3R; phosphoinositide-3-kinase, regulatory subunit         | T up |
| <b>ko05166</b> | <b>HTLV-I infection</b>                       |                                                              |      |
|                | ko:K09341                                     | MSX; homeobox protein MSX                                    | T up |
|                | ko:K09341                                     | MSX; homeobox protein MSX                                    | T up |
|                | ko:K05433                                     | IL15; interleukin 15                                         | T up |
|                | ko:K08045                                     | ADCY5; adenylate cyclase 5 [EC:4.6.1.1]                      | T up |
|                | ko:K00572                                     | WNT7; wingless-type MMTV integration site family, member 7   | T up |
|                | ko:K00445                                     | WNT6; wingless-type MMTV integration site family, member 6   | T up |
|                | ko:K01384                                     | WNT11; wingless-type MMTV integration site family, member 11 | T up |
|                | ko:K02649                                     | PIK3R; phosphoinositide-3-kinase, regulatory subunit         | T up |
|                | ko:K02649                                     | PIK3R; phosphoinositide-3-kinase, regulatory subunit         | T up |
|                | ko:K02354                                     | FZD4, fz4; frizzled 4                                        | T up |
|                | ko:K06622                                     | CDKN2C, P18, INK4C; cyclin-dependent kinase inhibitor 2C     | T up |
| <b>ko05162</b> | <b>Measles</b>                                |                                                              |      |
|                | ko:K18052                                     | PRKCQ; novel protein kinase C theta type [EC:2.7.11.13]      | T up |
|                | ko:K02649                                     | PIK3R; phosphoinositide-3-kinase, regulatory subunit         | T up |

|                |                                     |                                                                    |      |
|----------------|-------------------------------------|--------------------------------------------------------------------|------|
|                | ko:K02649                           | PIK3R; phosphoinositide-3-kinase, regulatory subunit               | T up |
|                | ko:K03283                           | HSPA1_8; heat shock 70kDa protein 1/8                              | T up |
| <b>ko05164</b> | <b>Influenza A</b>                  |                                                                    |      |
|                | ko:K02649                           | PIK3R; phosphoinositide-3-kinase, regulatory subunit               | T up |
|                | ko:K02649                           | PIK3R; phosphoinositide-3-kinase, regulatory subunit               | T up |
|                | ko:K03283                           | HSPA1_8; heat shock 70kDa protein 1/8                              | T up |
|                | ko:K10030                           | IL8, CXCL8; interleukin 8                                          | T up |
|                | ko:K01349                           | FURIN, PCSK3; furin [EC:3.4.21.75]                                 | T up |
|                | ko:K15046                           | NS1BP; influenza virus NS1A-binding protein                        | C up |
| <b>ko05161</b> | <b>Hepatitis B</b>                  |                                                                    |      |
|                | ko:K09048                           | CREB3; cyclic AMP-responsive element-binding protein 3             | T up |
|                | ko:K09048                           | CREB3; cyclic AMP-responsive element-binding protein 3             | T up |
|                | ko:K02649                           | PIK3R; phosphoinositide-3-kinase, regulatory subunit               | T up |
|                | ko:K02649                           | PIK3R; phosphoinositide-3-kinase, regulatory subunit               | T up |
|                | ko:K11222                           | STAT4; signal transducer and activator of transcription 4          | T up |
|                | ko:K10030                           | IL8, CXCL8; interleukin 8                                          | T up |
| <b>ko05160</b> | <b>Hepatitis C</b>                  |                                                                    |      |
|                | ko:K10030                           | IL8, CXCL8; interleukin 8                                          | T up |
|                | ko:K03250                           | EIF3E, INT6; translation initiation factor 3 subunit E             | C up |
|                | ko:K02649                           | PIK3R; phosphoinositide-3-kinase, regulatory subunit               | T up |
|                | ko:K02649                           | PIK3R; phosphoinositide-3-kinase, regulatory subunit               | T up |
|                | ko:K14217                           | IFIT1; interferon-induced protein with tetratricopeptide repeats 1 | T up |
| <b>ko05168</b> | <b>Herpes simplex infection</b>     |                                                                    |      |
|                | ko:K05433                           | IL15; interleukin 15                                               | T up |
|                | ko:K14217                           | IFIT1; interferon-induced protein with tetratricopeptide repeats 1 | T up |
|                | ko:K03990                           | C3; complement component 3                                         | T up |
| <b>ko05169</b> | <b>Epstein-Barr virus infection</b> |                                                                    |      |
|                | ko:K05134                           | IL10RA; interleukin 10 receptor alpha                              | T up |
|                | ko:K04012                           | CR2, CD21; complement receptor type 2                              | T up |
|                | ko:K03283                           | HSPA1_8; heat shock 70kDa protein 1/8                              | T up |
|                | ko:K02649                           | PIK3R; phosphoinositide-3-kinase, regulatory subunit               | T up |
|                | ko:K02649                           | PIK3R; phosphoinositide-3-kinase, regulatory subunit               | T up |
| <b>ko05146</b> | <b>Amoebiasis</b>                   |                                                                    |      |
|                | ko:K04633                           | GNAL; guanine nucleotide-binding protein G(olf) subunit alpha      | T up |
|                | ko:K02649                           | PIK3R; phosphoinositide-3-kinase, regulatory subunit               | T up |
|                | ko:K02649                           | PIK3R; phosphoinositide-3-kinase, regulatory subunit               | T up |
|                | ko:K05717                           | FN1; fibronectin 1                                                 | T up |
|                | ko:K06240                           | LAMA3_5; laminin, alpha 3/5                                        | T up |
|                | ko:K10030                           | IL8, CXCL8; interleukin 8                                          | T up |
|                | ko:K06236                           | COL1A5; collagen, type I/II/III/V/XI/XXIV/XXVII, alpha             | T up |
|                | ko:K07898                           | RAB7B; Ras-related protein Rab-7B                                  | T up |
|                | ko:K06237                           | COL4A; collagen, type IV, alpha                                    | T up |
| <b>ko05144</b> | <b>Malaria</b>                      |                                                                    |      |

|                |                                                  |                                                                                                 |      |
|----------------|--------------------------------------------------|-------------------------------------------------------------------------------------------------|------|
|                | ko:K10030                                        | IL8, CXCL8; interleukin 8                                                                       | T up |
|                | ko:K04550                                        | LRP1, CD91; low-density lipoprotein receptor-related protein 1 (alpha-2-macroglobulin receptor) | T up |
| <b>ko05145</b> | <b>Toxoplasmosis</b>                             |                                                                                                 |      |
|                | ko:K06240                                        | LAMA3_5; laminin, alpha 3/5                                                                     | T up |
|                | ko:K05134                                        | IL10RA; interleukin 10 receptor alpha                                                           | T up |
|                | ko:K02649                                        | PIK3R; phosphoinositide-3-kinase, regulatory subunit                                            | T up |
|                | ko:K02649                                        | PIK3R; phosphoinositide-3-kinase, regulatory subunit                                            | T up |
|                | ko:K03283                                        | HSPA1_8; heat shock 70kDa protein 1/8                                                           | T up |
| <b>ko05140</b> | <b>Leishmaniasis</b>                             |                                                                                                 |      |
|                | ko:K03990                                        | C3; complement component 3                                                                      | T up |
| <b>ko05142</b> | <b>Chagas disease (American trypanosomiasis)</b> |                                                                                                 |      |
|                | ko:K03990                                        | C3; complement component 3                                                                      | T up |
|                | ko:K04633                                        | GNAL; guanine nucleotide-binding protein G(olf) subunit alpha                                   | T up |
|                | ko:K02649                                        | PIK3R; phosphoinositide-3-kinase, regulatory subunit                                            | T up |
|                | ko:K02649                                        | PIK3R; phosphoinositide-3-kinase, regulatory subunit                                            | T up |
|                | ko:K10030                                        | IL8, CXCL8; interleukin 8                                                                       | T up |

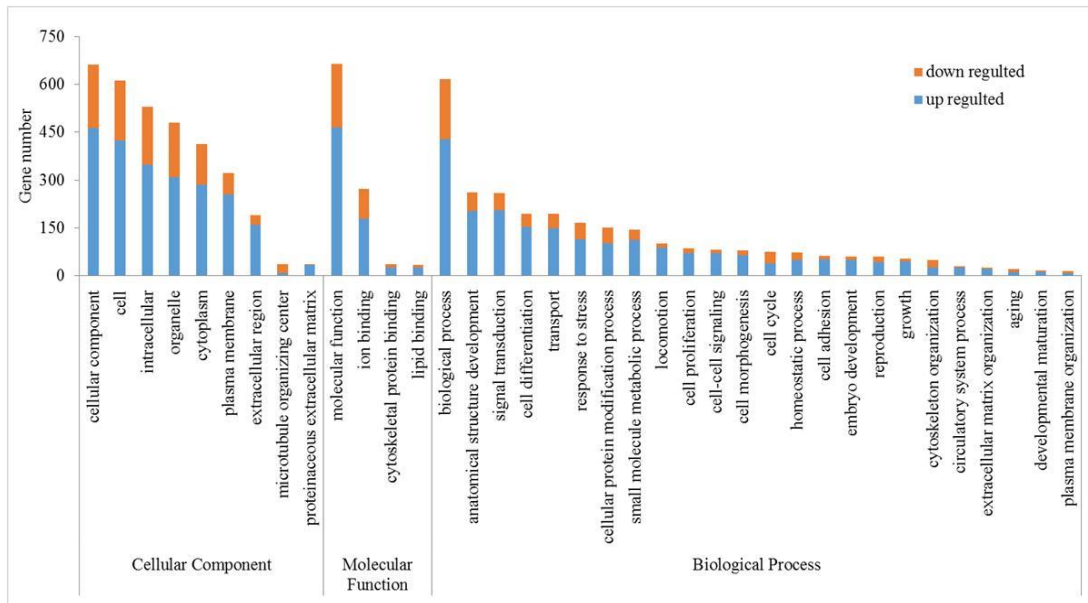

Fig. S1. GO annotation of the differentially expressed genes. The genes are enriched in different terms in three functional categories.

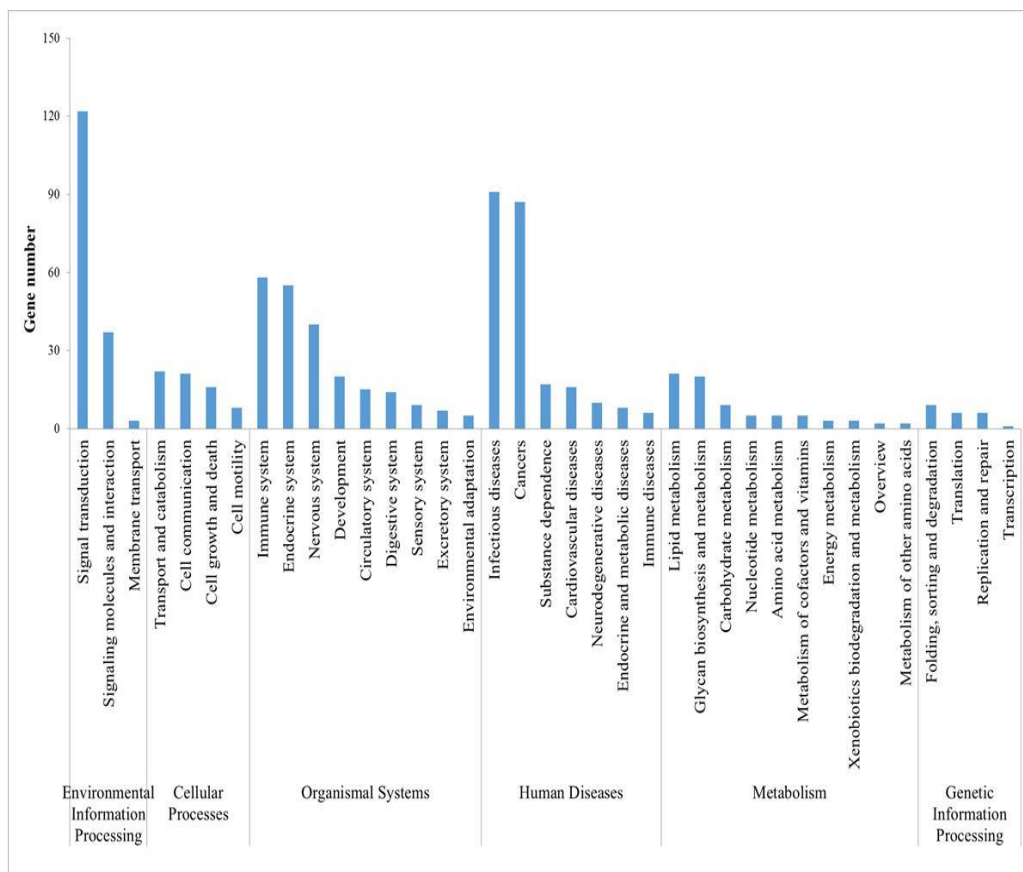

Fig. S2. KEGG annotation of the differentially expressed genes. The genes are enriched in different pathways in different functional groups.



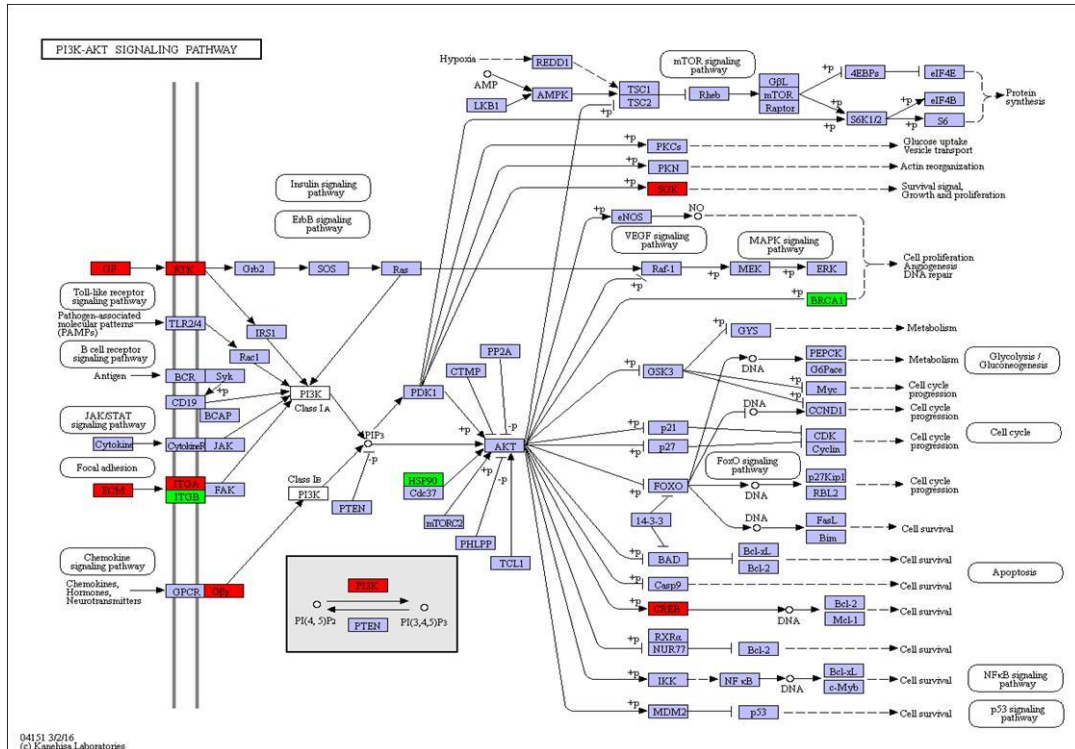

Fig. S3. KEGG analysis reveals that AKT pathway is activated by high glucose, insulin and palmitic acid.

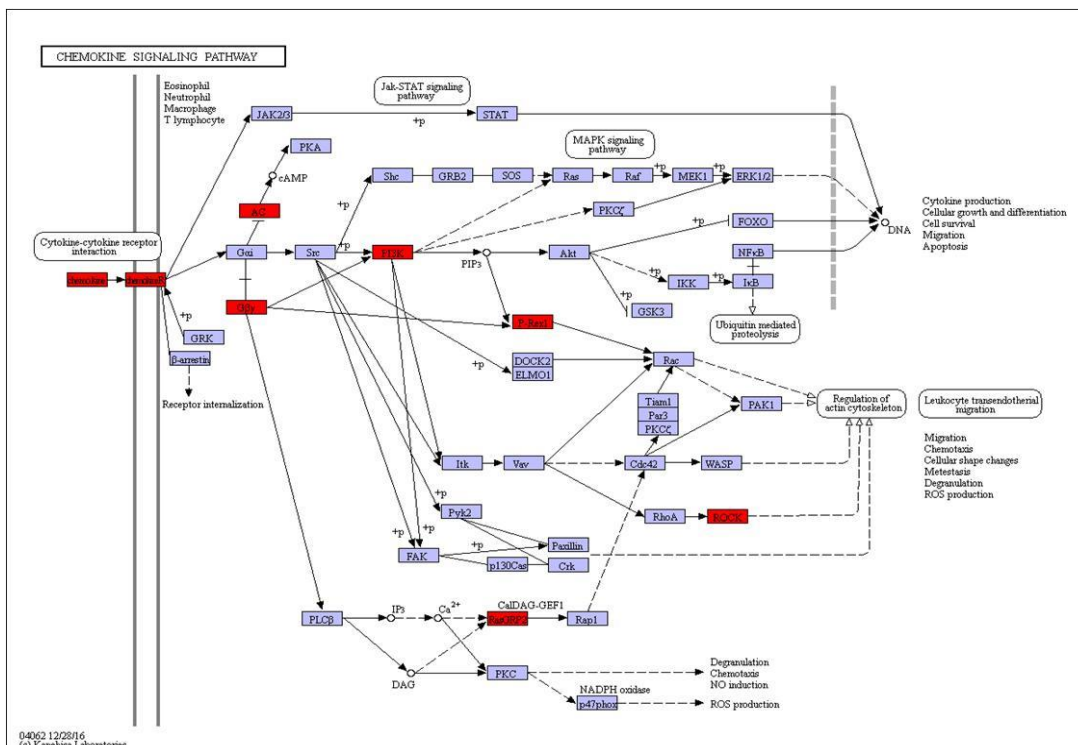

Fig. S4. KEGG analysis reveals that ROCK pathway is activated by high glucose, insulin and palmitic acid.

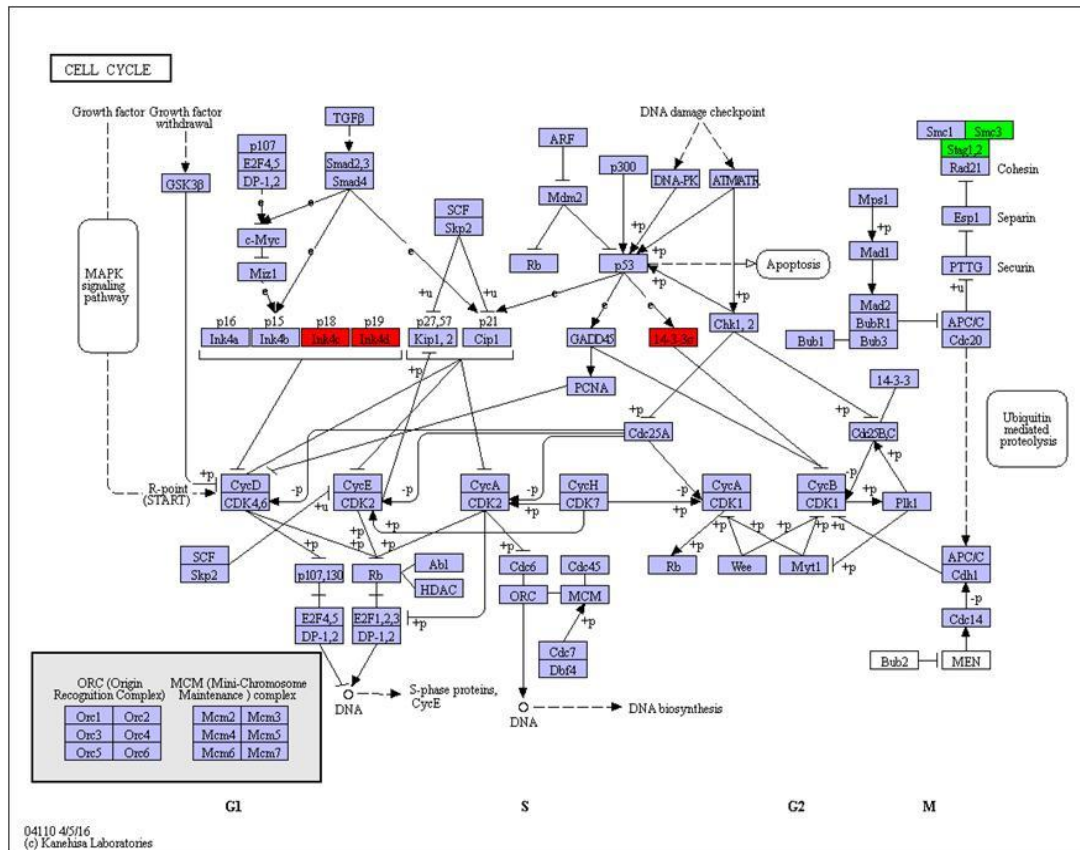

Fig. S5. KEGG analysis reveals that 14-3-3 $\sigma$  pathway is activated by high glucose, insulin and palmitic acid.
